# Supplementary material
Source: PubMed Central journal article supplement (PMC10575662)

## Appendix 1: Search strategy and PRISMA flow diagrams

### Search Strategy (Final)

Key words for both MEDLINE and Cochrane Databases. Search ran on March 23, 2022.

#### A. Statins

2017-Present 1. meta-analysis.pt. 2. (meta-anal\$ or metaanal\$).mp. 3. ((quantitativ\$ adj3 review\$1) or (quantitativ\$ adj3 overview\$)).mp. 4. ((systematic\$ adj3 review\$) or (systematic adj3 overview\$)).mp. 5. ((methodologic adj3 review\$1) or (methodologic adj3 overview\$)).mp. 6. (integrat\$ adj5 research).mp. 7. (quantitativ\$ adj3 synthes\$).mp. 8. or/1-7 9. review.pt. or (review\$ or overview\$).mp. 10. (medline or medlars or pubmed or index medicus or embase or cochrane).mp. 11. (scisearch or web of science or psycinfo or psychinfo or cinahl or cinhal).mp. 12. (excerpta medica or psychlit or psyclit or current contents or science citation index or sciences citation index or scopus).mp. 13. (hand search\$ or manual search\$).mp. 14. ((electronic adj3 database\$) or (bibliographic adj3 database\$) or periodical index\$).mp. 15. (pooling or pooled or mantel haenszel).mp. 16. (peto or der simonian or dersimonian or fixed effect\$).mp. 17. ((combine\$ or combining) adj5 (data or trial or trials or studies or study or result or results)).mp. 18. or/10-17 19. 9 and 18 20. 8 or 19 21. (hta\$ or health technology assessment\$ or biomedical technology assessment\$).mp. 22. technology assessment, biomedical/ or biomedical technology assessment/ 23. 21 or 22 24. 20 or 23 25. exp Hydroxymethylglutaryl-CoA Reductase Inhibitors/ 26. (statin or statins).mp. 27. atorvastatin.mp. or exp Atorvastatin/ 28. cerivastatin.mp. 29. fluvastatin.mp. or exp Fluvastatin/ 30. lovastatin.mp. or exp Lovastatin/ 31. exp Pravastatin/ or pravastatin.mp. 32. exp Simvastatin/ or simvastatin.mp. 33. lipitor.mp. 34. baycol.mp. 35. lescol.mp. 36. mevacor.mp. 37. altacor.mp. 38. pravachol.mp. 39. zocor.mp. 40. mevinolin.mp. 41. compactin.mp. 42. fluidostatin.mp. 43. rosuvastatin.mp. or exp Rosuvastatin Calcium/ 44. altoprev.mp. 45. pitavastatin.mp. 46. livalo.mp. 47. zypitamag.mp. 48. crestor.mp. 49. ezallor.mp. 50. 25 or 26 or 27 or 28 or 29 or 30 or 31 or 32 or 33 or 34 or 35 or 36 or 37 or 38 or 39 or 40 or 41 or 42 or 43 or 44 or 45 or 46 or 47 or 48 or 49 51. 24 and 50 52. limit 51 to yr="2017 -Current"

#### B. Niacin

2017-Present 1. meta-analysis.pt. 2. (meta-anal\$ or metaanal\$).mp. 3. ((quantitativ\$ adj3 review\$1) or (quantitativ\$ adj3 overview\$)).mp. 4. ((systematic\$ adj3 review\$) or (systematic adj3 overview\$)).mp. 5. ((methodologic adj3 review\$1) or (methodologic adj3 overview\$)).mp. 6. (integrat\$ adj5 research).mp. 7. (quantitativ\$ adj3 synthes\$).mp. 8. or/1-7 9. review.pt. or (review\$ or overview\$).mp. 10. (medline or medlars or pubmed or index medicus or embase or cochrane).mp. 11. (scisearch or web of science or psycinfo or psychinfo or cinahl or cinhal).mp. 12. (excerpta medica or psychlit or psyclit or current contents or science citation index or sciences citation index or scopus).mp. 13. (hand search\$ or manual search\$).mp. 14. ((electronic adj3 database\$) or (bibliographic adj3 database\$) or periodical index\$).mp. 15. (pooling or pooled or mantel haenszel).mp. 16. (peto or der simonian or dersimonian or fixed effect\$).mp. 17. ((combine\$ or combining) adj5 (data or trial or trials or studies or study or result or results)).mp. 18. or/10-17 19. 9 and 18 20. 8 or 19 21. (hta\$ or health technology assessment\$ or biomedical technology assessment\$).mp. 22. technology assessment, biomedical/ or biomedical technology

assessment/ 23. 21 or 22 24. 20 or 23 25. niacin.mp. or exp Niacin/ 26. niacinamide.mp. or exp Niacinamide/ 27. nicotinic acid.mp. 28. nicamin.mp. 29. nicotinate.mp. 30. induracin.mp. 31. pyridinecarboxamide.mp. 32. niacor.mp. 33. nicolar.mp. 34. nicobid.mp. 35. pyridinecarboxylic acid.mp. 36. enduracin.mp. 37. nicotinsaureamid.mp. 38. nicotinex.mp. 39. vitamin B3.mp. 40. nicotinamide.mp. 41. enduramide.mp. 42. niaspan.mp. 43. tredaptive.mp. 44. vitb3.mp. 45. 25 or 26 or 27 or 28 or 29 or 30 or 31 or 32 or 33 or 34 or 35 or 36 or 37 or 38 or 39 or 40 or 41 or 42 or 43 or 44 46. 24 and 45 47. limit 46 to yr="2017 - Current"

#### C. PCSK-9 Inhibitors

2017-Present 1. meta-analysis.pt. 2. (meta-anal\$ or metaanal\$).mp. 3. ((quantitativ\$ adj3 review\$1) or (quantitativ\$ adj3 overview\$)).mp. 4. ((systematic\$ adj3 review\$) or (systematic adj3 overview\$)).mp. 5. ((methodologic adj3 review\$1) or (methodologic adj3 overview\$)).mp. 6. (integrat\$ adj5 research).mp. 7. (quantitativ\$ adj3 synthes\$).mp. 8. or/1-7 9. review.pt. or (review\$ or overview\$).mp. 10. (medline or medlars or pubmed or index medicus or embase or cochrane).mp. 11. (scisearch or web of science or psycinfo or psychinfo or cinahl or cinhal).mp. 12. (excerpta medica or psychlit or psyclit or current contents or science citation index or sciences citation index or scopus).mp. 13. (hand search\$ or manual search\$).mp. 14. ((electronic adj3 database\$) or (bibliographic adj3 database\$) or periodical index\$).mp. 15. (pooling or pooled or mantel haenszel).mp. 16. (peto or der simonian or dersimonian or fixed effect\$).mp. 17. ((combine\$ or combining) adj5 (data or trial or trials or studies or study or result or results)).mp. 18. or/10-17 19. 9 and 18 20. 8 or 19 21. (hta\$ or health technology assessment\$ or biomedical technology assessment\$).mp. 22. technology assessment, biomedical/ or biomedical technology assessment/ 23. 21 or 22 24. 20 or 23 25. PCSK9 Inhibitor.mp. or exp PCSK9 Inhibitors/ 26. evolocumab.mp. 27. alirocumab.mp. 28. exp Proprotein Convertases/ 29. proprotein convertase\*.mp. 30. pro-protein convertase\*.mp. 31. pcsk9.mp. 32. serine proteinase\*.mp. 33. repatha.mp. 34. praluent.mp. 35. 25 or 26 or 27 or 28 or 29 or 30 or 31 or 32 or 33 or 34 36. 24 and 35 37. limit 36 to yr="2017 -Current"

#### D. Ezetimibe

No date limit. 1. meta-analysis.pt. 2. (meta-anal\$ or metaanal\$).mp. 3. ((quantitativ\$ adj3 review\$1) or (quantitativ\$ adj3 overview\$)).mp. 4. ((systematic\$ adj3 review\$) or (systematic adj3 overview\$)).mp. 5. ((methodologic adj3 review\$1) or (methodologic adj3 overview\$)).mp. 6. (integrat\$ adj5 research).mp. 7. (quantitativ\$ adj3 synthes\$).mp. 8. or/1-7 9. review.pt. or (review\$ or overview\$).mp. 10. (medline or medlars or pubmed or index medicus or embase or cochrane).mp. 11. (scisearch or web of science or psycinfo or psychinfo or cinahl or cinhal).mp. 12. (excerpta medica or psychlit or psyclit or current contents or science citation index or sciences citation index or scopus).mp. 13. (hand search\$ or manual search\$).mp. 14. ((electronic adj3 database\$) or (bibliographic adj3 database\$) or periodical index\$).mp. 15. (pooling or pooled or mantel haenszel).mp. 16. (peto or der simonian or dersimonian or fixed effect\$).mp. 17. ((combine\$ or combining) adj5 (data or trial or trials or studies or study or result or results)).mp. 18. or/10-17 19. 9 and 18 20. 8 or 19 21. (hta\$ or health technology assessment\$ or biomedical technology assessment\$).mp. 22. technology assessment, biomedical/ or biomedical technology assessment/ 23. 21 or 22 24. 20 or 23 25. exp Ezetimibe/ or ezetimibe.mp. 26. ezetimib.mp. 27. ezetrol.mp. 28. zetia.mp. 29. vytorin.mp. 30. inegy.mp. 31. SCH-58235.mp. 32. SCH58235.mp. 33. 25 or 26 or 27 or 28 or 29 or 30 or 31 or 32 34. 24 and 33

## E. Fibrates

No date limit. 1. meta-analysis.pt. 2. (meta-anal\$ or metaanal\$).mp. 3. ((quantitativ\$ adj3 review\$1) or (quantitativ\$ adj3 overview\$)).mp. 4. ((systematic\$ adj3 review\$) or (systematic adj3 overview\$)).mp. 5. ((methodologic adj3 review\$1) or (methodologic adj3 overview\$)).mp. 6. (integrat\$ adj5 research).mp. 7. (quantitativ\$ adj3 synthes\$).mp. 8. or/1-7 9. review.pt. or (review\$ or overview\$).mp. 10. (medline or medlars or pubmed or index medicus or embase or cochrane).mp. 11. (scisearch or web of science or psycinfo or psychinfo or cinahl or cinhal).mp. 12. (excerpta medica or psychlit or psyclit or current contents or science citation index or sciences citation index or scopus).mp. 13. (hand search\$ or manual search\$).mp. 14. ((electronic adj3 database\$) or (bibliographic adj3 database\$) or periodical index\$).mp. 15. (pooling or pooled or mantel haenszel).mp. 16. (peto or der simonian or dersimonian or fixed effect\$).mp. 17. ((combine\$ or combining) adj5 (data or trial or trials or studies or study or result or results)).mp. 18. or/10-17 19. 9 and 18 20. 8 or 19 21. (hta\$ or health technology assessment\$ or biomedical technology assessment\$).mp. 22. technology assessment, biomedical/ or biomedical technology assessment/ 23. 21 or 22 24. 20 or 23 25. amphipathic carboxylic acids.mp. 26. fibric acids.mp. or exp Fibric Acids/ 27. (fibrate\* or fibric acid\*).mp. 28. clofibrac acid.mp. or exp Clofibrac Acid/ 29. gemfibrozil.mp. or exp Gemfibrozil/ 30. bezafibrate.mp. or exp Bezafibrate/ 31. clofibrate.mp. or exp Clofibrate/ 32. procetofen.mp. or exp Fenofibrate/ 33. abitrate.mp. 34. amotril.mp. 35. etofibrate.mp. 36. ciprofibrate.mp. 37. fenofibrac acid.mp. 38. antara.mp. 39. fenoglide.mp. 40. fibricor.mp. 41. lipofen.mp. 42. tricor.mp. 43. triglide.mp. 44. trilipix.mp. 45. lipidil supra.mp. 46. 25 or 26 or 27 or 28 or 29 or 30 or 31 or 32 or 33 or 34 or 35 or 36 or 37 or 38 or 39 or 40 or 41 or 42 or 43 or 44 or 45 47. 24 and 46

## F. Omega-3s

2017-Current. 1. meta-analysis.pt. 2. (meta-anal\$ or metaanal\$).mp. 3. ((quantitativ\$ adj3 review\$1) or (quantitativ\$ adj3 overview\$)).mp. 4. ((systematic\$ adj3 review\$) or (systematic adj3 overview\$)).mp. 5. ((methodologic adj3 review\$1) or (methodologic adj3 overview\$)).mp. 6. (integrat\$ adj5 research).mp. 7. (quantitativ\$ adj3 synthes\$).mp. 8. or/1-7 9. review.pt. or (review\$ or overview\$).mp. 10. (medline or medlars or pubmed or index medicus or embase or cochrane).mp. 11. (scisearch or web of science or psycinfo or psychinfo or cinahl or cinhal).mp. 12. (excerpta medica or psychlit or psyclit or current contents or science citation index or sciences citation index or scopus).mp. 13. (hand search\$ or manual search\$).mp. 14. ((electronic adj3 database\$) or (bibliographic adj3 database\$) or periodical index\$).mp. 15. (pooling or pooled or mantel haenszel).mp. 16. (peto or der simonian or dersimonian or fixed effect\$).mp. 17. ((combine\$ or combining) adj5 (data or trial or trials or studies or study or result or results)).mp. 18. or/10-17 19. 9 and 18 20. 8 or 19 21. (hta\$ or health technology assessment\$ or biomedical technology assessment\$).mp. 22. technology assessment, biomedical/ or biomedical technology assessment/ 23. 21 or 22 24. 20 or 23 25. fish oil.mp. or exp Fish Oils/ 26. fish oil\*.mp. 27. exp Linseed Oil/ 28. exp alpha-Linolenic Acid/ 29. exp Fatty Acids, Omega-3/ 30. exp Flax/ 31. (omega-3 or omega3 or omega\*).mp. 32. exp Eicosapentaenoic Acid/ or eicosapentaenoic\*.mp. 33. exp Docosahexaenoic Acids/ or docosahexaenoic\*.mp. 34. (linolen\* or alpha-linolen\* or alphaslinolen\*).mp. 35. (marin\* adj3 lipid\*).mp. 36. (DHA or EPA).mp. 37. (fish adj3 (diet\* or capsul\* or nutrit\* or supplement\*)).mp. 38. (ALA or DPA).mp. 39. 25 or 26 or 27 or 28 or 29 or 30 or 31 or 32 or 33 or 34 or 35 or 36 or 37 or 38 40. 24 and 39 41. limit 40 to yr="2017 -Current"

## G. Icosapent

No date limit. 1. meta-analysis.pt. 2. (meta-anal\$ or metaanal\$).mp. 3. ((quantitativ\$ adj3 review\$1) or (quantitativ\$ adj3 overview\$)).mp. 4. ((systematic\$ adj3 review\$) or (systematic adj3 overview\$)).mp. 5. ((methodologic adj3 review\$1) or (methodologic adj3 overview\$)).mp. 6. (integrat\$ adj5 research).mp. 7. (quantitativ\$ adj3 synthes\$).mp. 8. or/1-7 9. review.pt. or (review\$ or overview\$).mp. 10. (medline or medlars or pubmed or index medicus or embase or cochrane).mp. 11. (scisearch or web of science or psycinfo or psychinfo or cinahl or cinhal).mp. 12. (excerpta medica or psychlit or psyclit or current contents or science citation index or sciences citation index or scopus).mp. 13. (hand search\$ or manual search\$).mp. 14. ((electronic adj3 database\$) or (bibliographic adj3 database\$) or periodical index\$).mp. 15. (pooling or pooled or mantel haenszel).mp. 16. (peto or der simonian or dersimonian or fixed effect\$).mp. 17. ((combine\$ or combining) adj5 (data or trial or trials or studies or study or result or results)).mp. 18. or/10-17 19. 9 and 18 20. 8 or 19 21. (hta\$ or health technology assessment\$ or biomedical technology assessment\$).mp. 22. technology assessment, biomedical/ or biomedical technology assessment/ 23. 21 or 22 24. 20 or 23 25. Eicosapentaenoic Acid/ 26. ethyl eicosapentaenoic acid.mp. 27. icosapent\*.mp. 28. vascepa.mp. 29. 25 or 26 or 27 or 28 30. 24 and 29

## Bile acid sequestrants

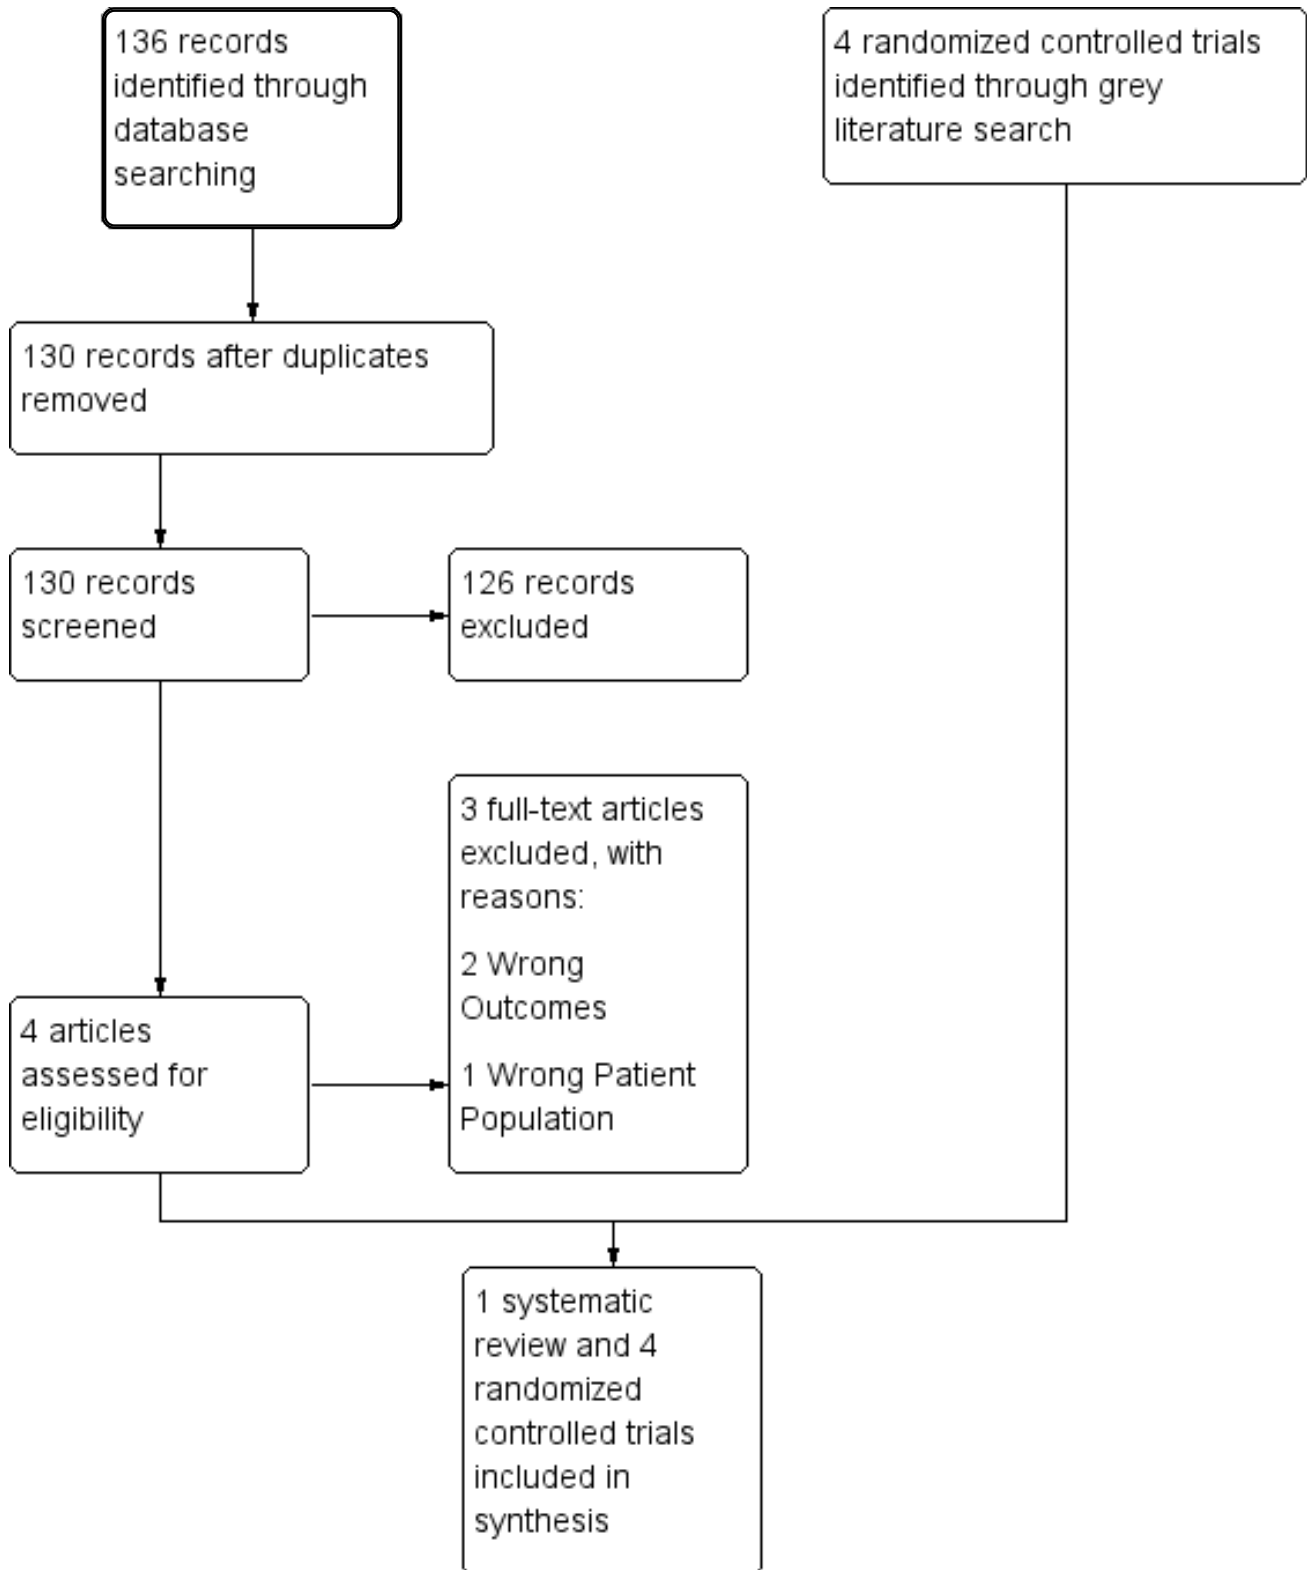

## Ezetimibe

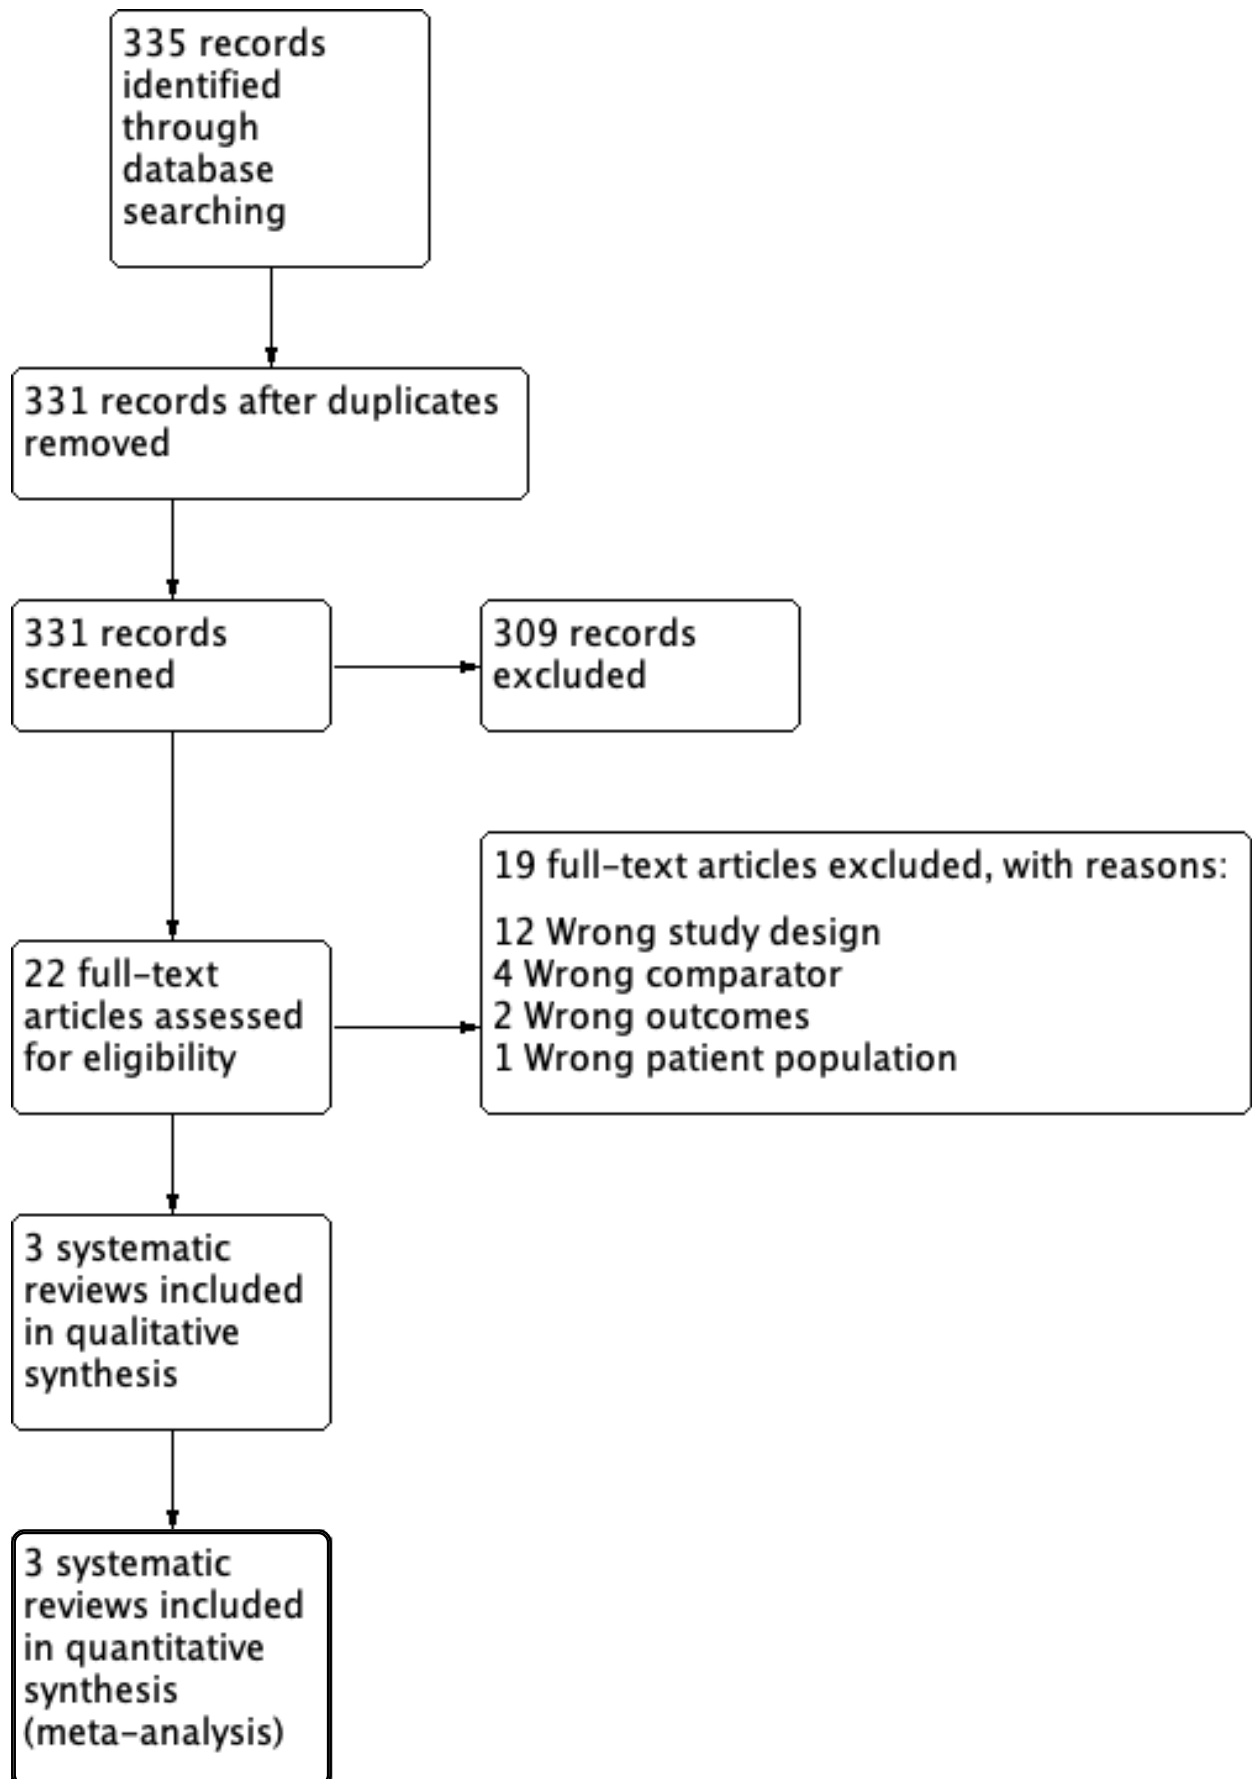

## Fibrates

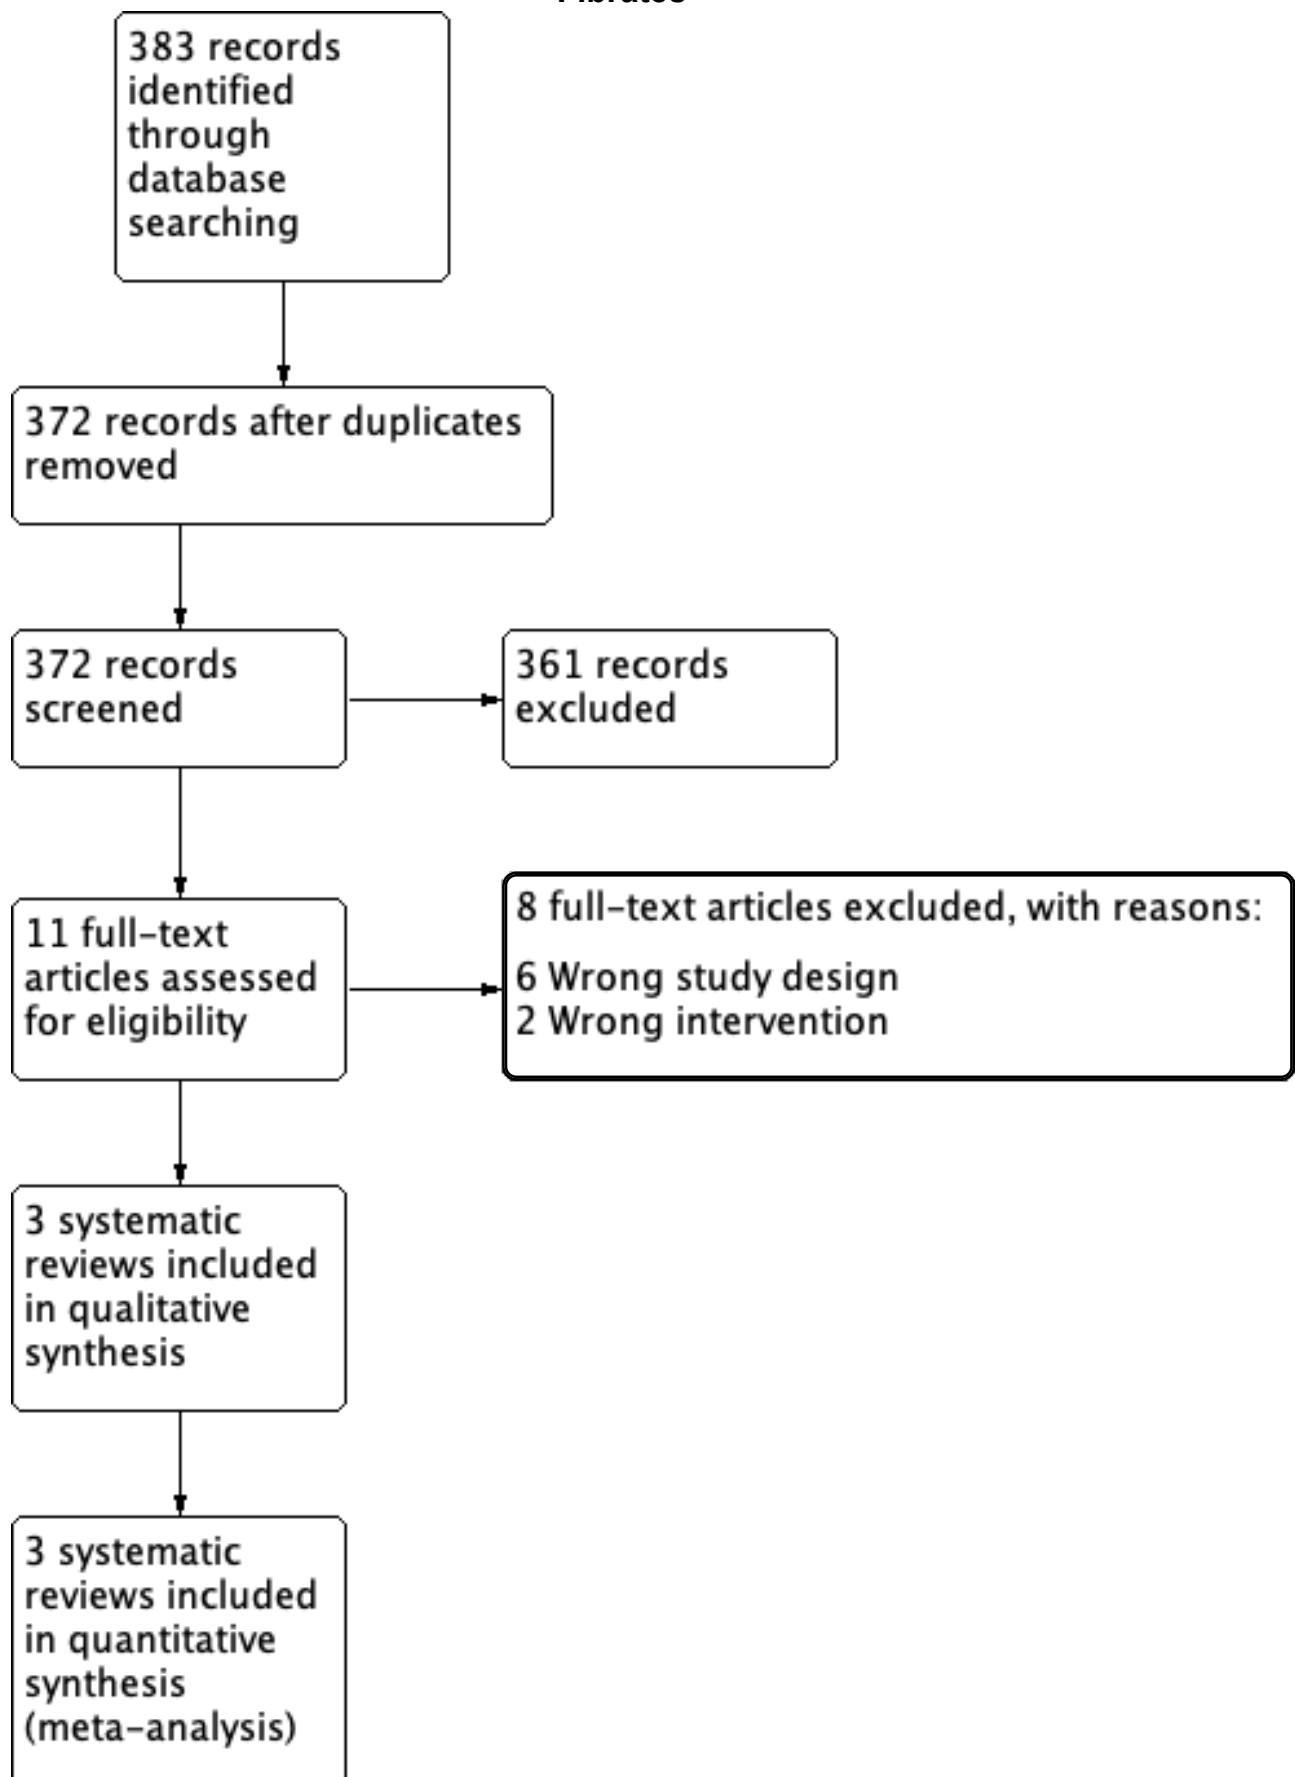

## Niacin

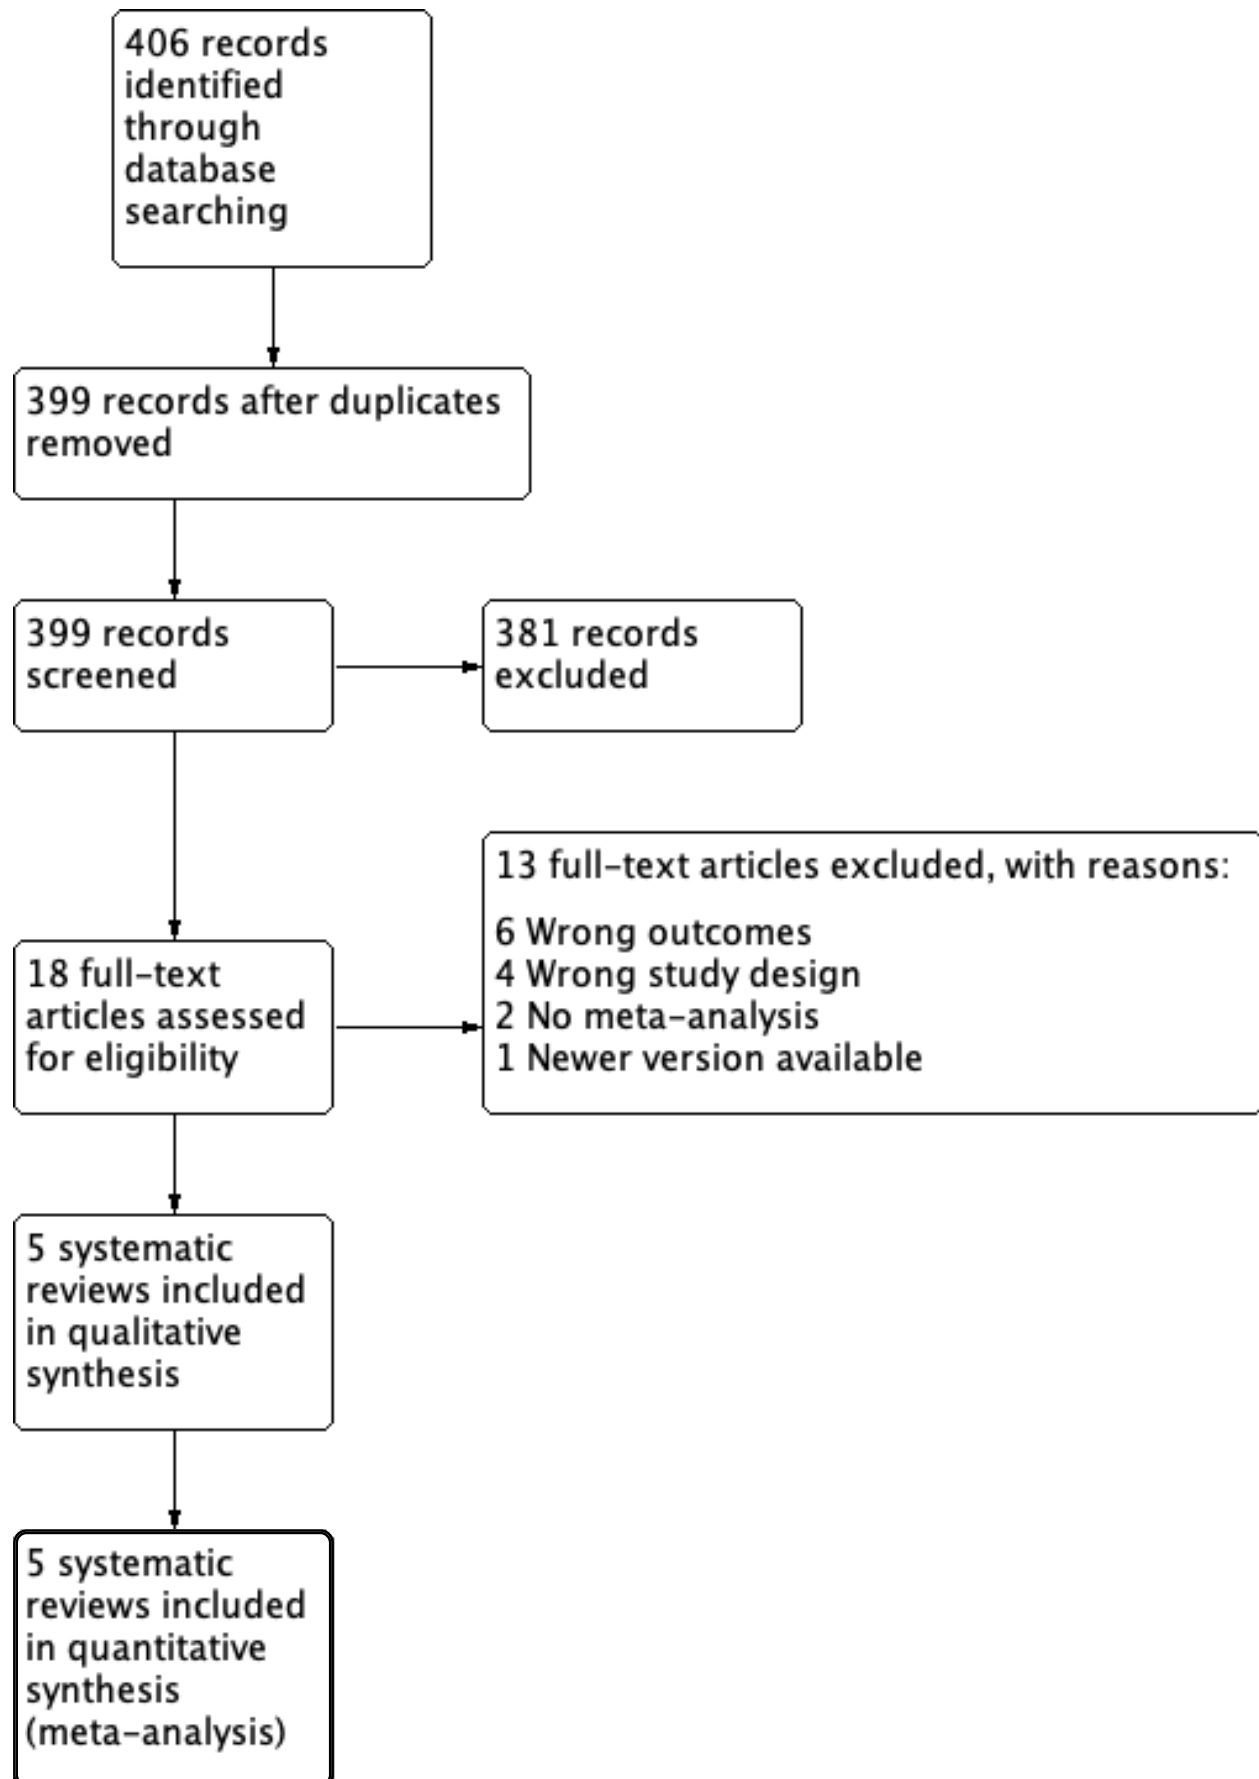



## Omega-3 supplements

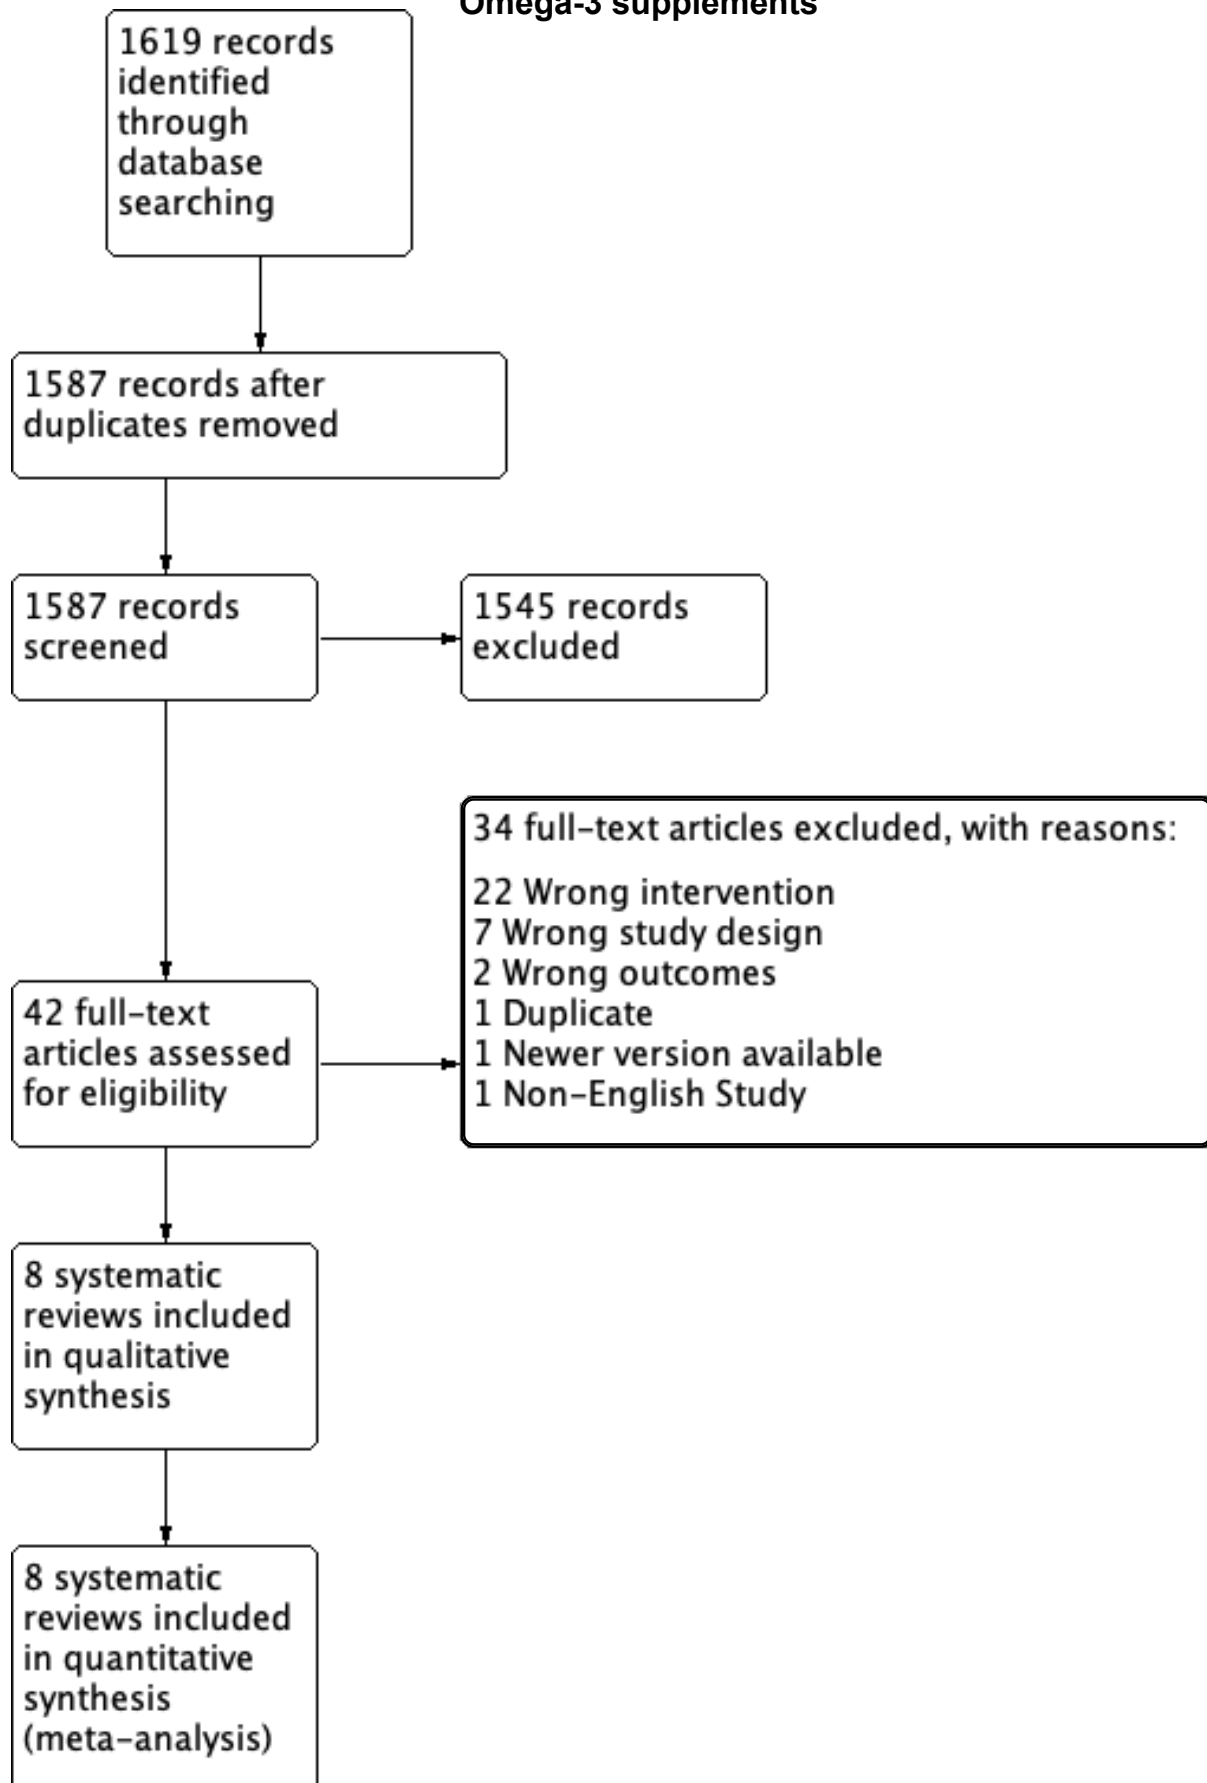

## PCSK9-inhibitors

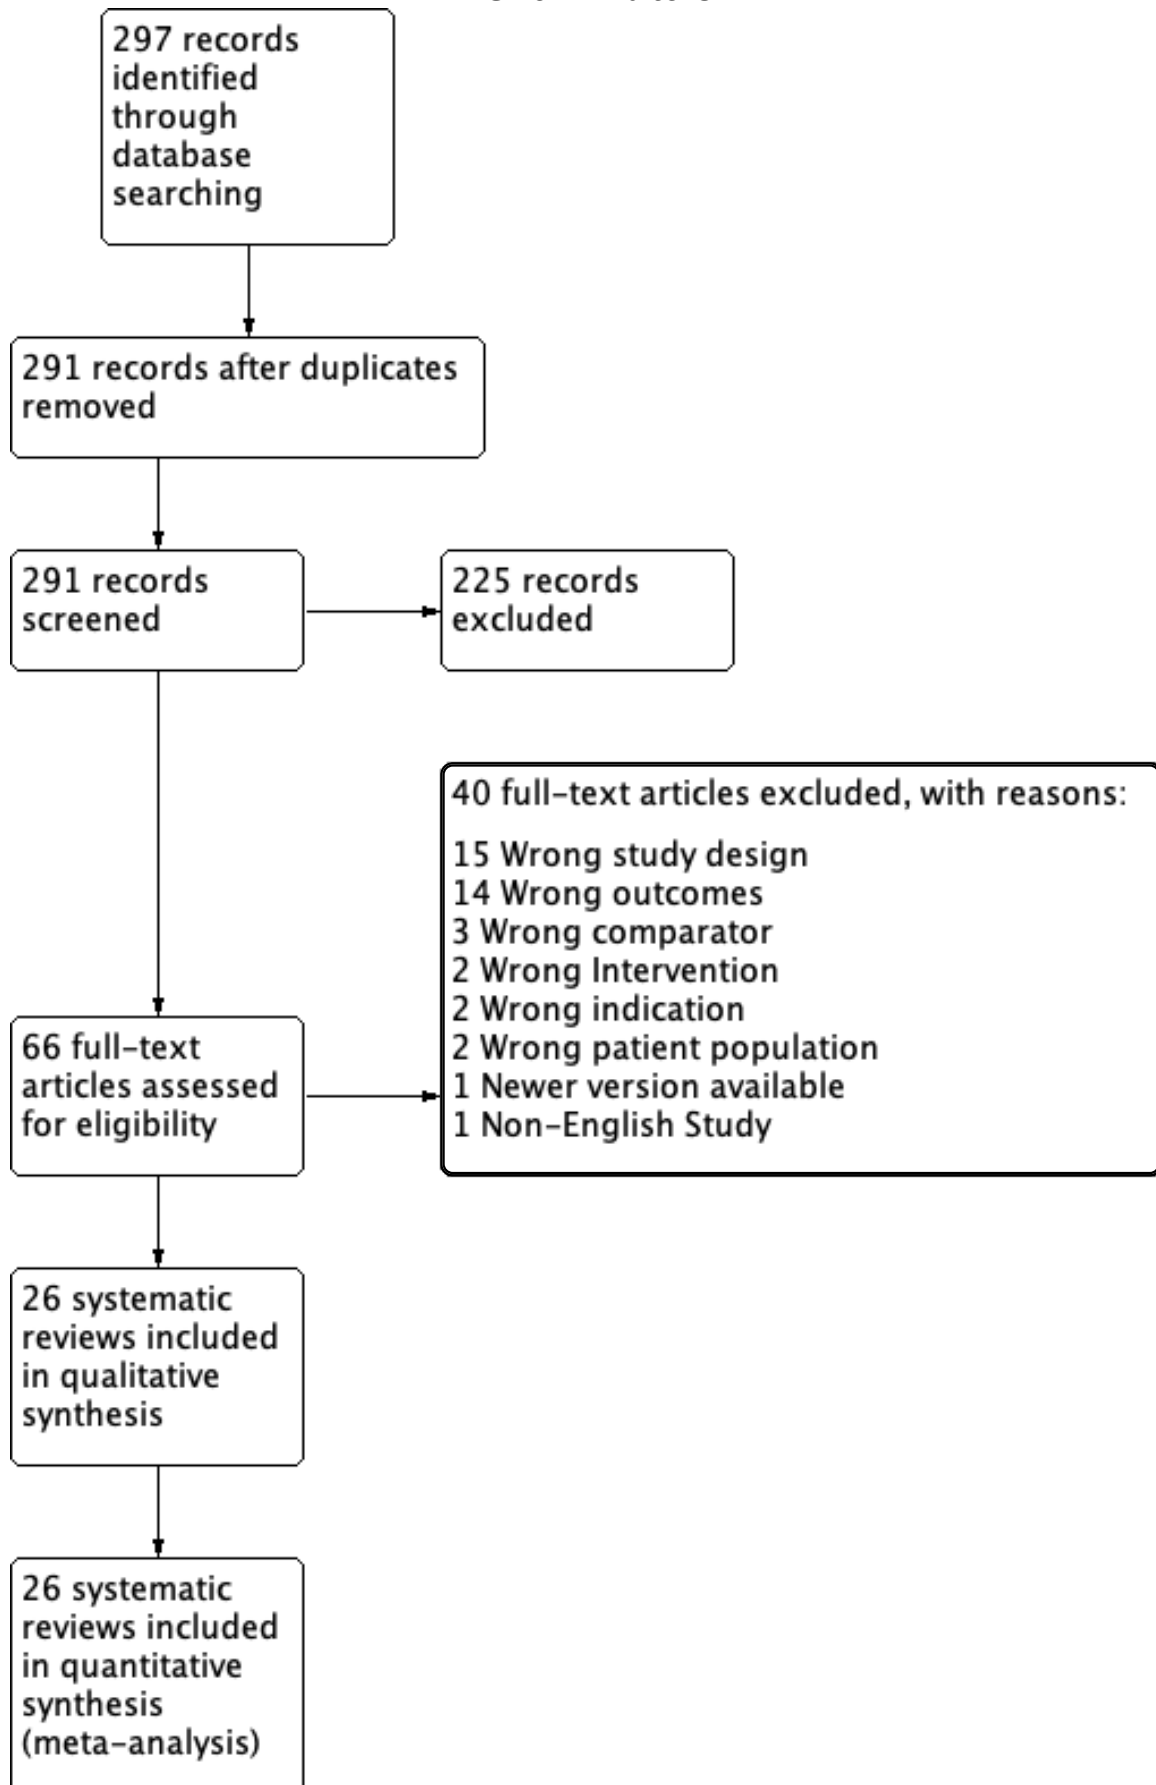

## Statins

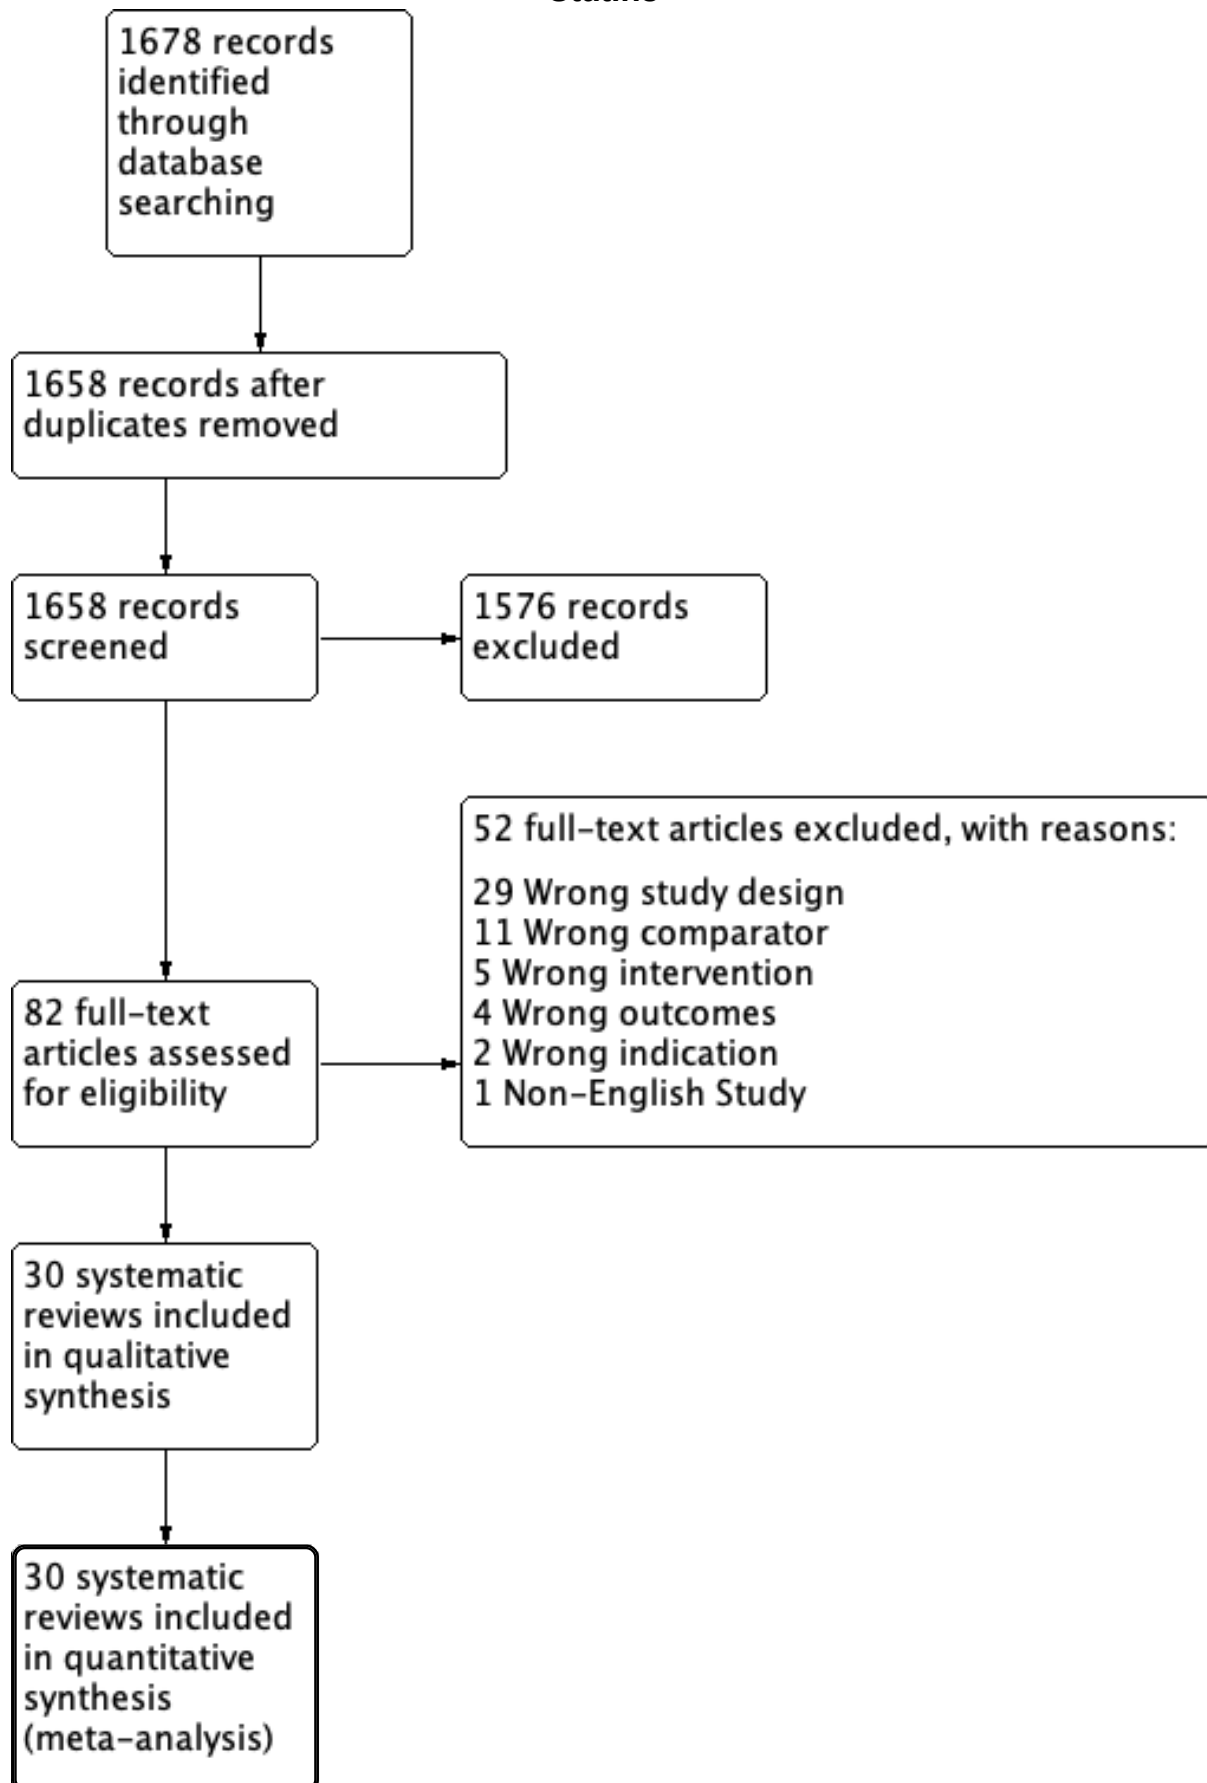

Supplement: Appendix_1_Search_Strategy_and_PRISMA_Flow_Diagrams.pdf [file Appendix_1_Search_Strategy_and_PRISMA_Flow_Diagrams.pdf]
