# Supplementary material
Source: PubMed Central journal article supplement (PMC10575662)
Supplement: Appendix_2_Risk_of_Bias_Assessment.pdf [file Appendix_2_Risk_of_Bias_Assessment.pdf]

Appendix 2. Risk of bias assessment

Table 1. AMSTAR score for included systematic reviews

| Study (Author, Year)                   | Was there duplicate study selection and data extraction? | Was a comprehensive literature search performed? | Were the characteristics of the included studies provided? | Was the scientific quality of the included studies assessed and documented? | Were the methods used to combine the findings of studies appropriate? | Was the conflict of interest stated? | Was publication bias formally assessed? |
|----------------------------------------|----------------------------------------------------------|--------------------------------------------------|------------------------------------------------------------|-----------------------------------------------------------------------------|-----------------------------------------------------------------------|--------------------------------------|-----------------------------------------|
| <b>Section: Bile Acid Sequestrants</b> |                                                          |                                                  |                                                            |                                                                             |                                                                       |                                      |                                         |
| Hansen, 2017 (safety only)             | Yes                                                      | Yes                                              | Yes                                                        | Yes                                                                         | Yes                                                                   | Yes                                  | Yes                                     |
| <b>Section: Ezetimibe</b>              |                                                          |                                                  |                                                            |                                                                             |                                                                       |                                      |                                         |
| Hong, 2018                             | Yes                                                      | Yes                                              | Yes                                                        | Yes                                                                         | Yes                                                                   | Yes                                  | Yes                                     |
| Toyota, 2019                           | Yes                                                      | Yes                                              | Yes                                                        | Yes                                                                         | Yes                                                                   | Yes                                  | Yes                                     |
| Zhan, 2018                             | Yes                                                      | Yes                                              | Yes                                                        | Yes                                                                         | Yes                                                                   | Yes                                  | Yes                                     |
| <b>Section: Fibrates</b>               |                                                          |                                                  |                                                            |                                                                             |                                                                       |                                      |                                         |
| Jakob, 2016                            | Yes                                                      | Yes                                              | Yes                                                        | Yes                                                                         | Yes                                                                   | Yes                                  | Yes                                     |
| Keene, 2014                            | Yes                                                      | Yes                                              | Yes                                                        | Yes                                                                         | Yes                                                                   | Yes                                  | Yes                                     |
| Wang, 2015                             | Yes                                                      | Yes                                              | Yes                                                        | Yes                                                                         | Yes                                                                   | Yes                                  | Yes                                     |
| <b>Section: Niacin</b>                 |                                                          |                                                  |                                                            |                                                                             |                                                                       |                                      |                                         |
| D'Andrea, 2019                         | No                                                       | Yes                                              | Yes                                                        | Yes                                                                         | Yes                                                                   | Yes                                  | No                                      |
| Garg, 2017                             | No                                                       | Yes                                              | Yes                                                        | No                                                                          | Yes                                                                   | Yes                                  | No                                      |
| Jenkins, 2021                          | Yes                                                      | Yes                                              | Yes                                                        | Yes                                                                         | YES                                                                   | Yes                                  | YES                                     |
| Riaz, 2019                             | Yes                                                      | Yes                                              | Yes                                                        | Yes                                                                         | No                                                                    | Yes                                  | Yes                                     |
| Schandelmaier, 2017                    | Yes                                                      | Yes                                              | Yes                                                        | Yes                                                                         | Yes                                                                   | Yes                                  | Yes                                     |
| <b>Section: Omega 3s</b>               |                                                          |                                                  |                                                            |                                                                             |                                                                       |                                      |                                         |
| Aung, 2018                             | No                                                       | Yes                                              | Yes                                                        | Yes                                                                         | Yes                                                                   | Yes                                  | Yes                                     |
| Cabiddu, 2020                          | Yes                                                      | Yes                                              | No                                                         | No                                                                          | No                                                                    | Yes                                  | No                                      |
| Casula, 2020                           | No                                                       | Yes                                              | Yes                                                        | Yes                                                                         | Yes                                                                   | Yes                                  | Yes                                     |
| Gencer, 2021                           | Yes                                                      | Yes                                              | Yes                                                        | Yes                                                                         | Yes                                                                   | Yes                                  | Yes                                     |
| Hu, 2019                               | No                                                       | No                                               | Yes                                                        | No                                                                          | Yes                                                                   | Yes                                  | No                                      |



|                         |     |     |     |     |     |     |     |
|-------------------------|-----|-----|-----|-----|-----|-----|-----|
| <b>Wang, 2021</b>       | No  | Yes | Yes | Yes | Yes | Yes | Yes |
| <b>Zhao, 2020</b>       | Yes |
| <b>Zhao, 2019</b>       | Yes |
| <b>Zhu, 2019</b>        | Yes | Yes | Yes | Yes | No  | Yes | Yes |
| <b>Section: Statins</b> |     |     |     |     |     |     |     |
| <b>Byrne, 2022</b>      | Yes | Yes | Yes | Yes | Yes | Yes | No  |
| <b>Cai, 2021</b>        | Yes |
| <b>Davis, 2021</b>      | Yes |
| <b>Domecq, 2019</b>     | Yes | Yes | Yes | Yes | Yes | Yes | No  |
| <b>Engeda, 2019</b>     | Yes | Yes | Yes | Yes | No  | Yes | Yes |
| <b>Fang, 2017</b>       | Yes |
| <b>Irwin, 2018</b>      | Yes |
| <b>Khan, 2019</b>       | Yes |
| <b>Kim, 2020</b>        | Yes | No  | Yes | No  | Yes | Yes | Yes |
| <b>Koskinas, 2018</b>   | Yes |
| <b>Liang, 2018</b>      | Yes |
| <b>Li, 2019</b>         | Yes | Yes | Yes | Yes | No  | Yes | Yes |
| <b>Manktelow, 2009</b>  | Yes | Yes | Yes | Yes | Yes | Yes | No  |
| <b>Milionis, 2020</b>   | No  | No  | Yes | No  | Yes | Yes | No  |
| <b>Palmer, 2014</b>     | Yes |
| <b>Ponce, 2014</b>      | Yes | Yes | Yes | Yes | Yes | Yes | No  |
| <b>Riaz, 2017</b>       | No  | Yes | Yes | No  | Yes | Yes | Yes |
| <b>Sandwith, 2021</b>   | No  | Yes | Yes | No  | Yes | Yes | No  |
| <b>Singh, 2020</b>      | Yes |
| <b>Squizzato 2011</b>   | Yes |
| <b>Taylor, 2013</b>     | Yes |
| <b>Tramacere, 2019</b>  | Yes | Yes | Yes | Yes | Yes | Yes | No  |
| <b>Vale, 2014</b>       | Yes |
| <b>Villani, 2019</b>    | No  | Yes | Yes | Yes | Yes | Yes | Yes |
| <b>Wang, 2017</b>       | No  | Yes | Yes | Yes | Yes | Yes | Yes |

|                    |     |     |     |     |     |     |     |
|--------------------|-----|-----|-----|-----|-----|-----|-----|
| <b>Yebyo, 2019</b> | Yes | No  | Yes | Yes | Yes | No  | Yes |
| <b>Yin, 2022</b>   | No  | Yes | Yes | Yes | Yes | Yes | Yes |
| <b>Zhao, 2019</b>  | Yes |
| <b>Zhong, 2017</b> | Yes | Yes | Yes | No  | Yes | Yes | No  |
| <b>Zhou, 2020</b>  | Yes |

Table 2. Risk of Bias of randomized controlled trials

| <b>Study (Author, Year)</b>                 | <b>Random Sequence Generation</b> | <b>Allocation Concealment</b> | <b>Blinding of Participants</b> | <b>Blinding of Personnel</b> | <b>Blinding of Outcome Assessors</b> | <b>Incomplete Outcome Data</b> | <b>Selective Outcome Reporting</b> |
|---------------------------------------------|-----------------------------------|-------------------------------|---------------------------------|------------------------------|--------------------------------------|--------------------------------|------------------------------------|
| <b>Section: Bile Acid Sequestrants</b>      |                                   |                               |                                 |                              |                                      |                                |                                    |
| <b>Lipid Research Clinics Program, 1984</b> | Low Risk                          | Low Risk                      | Low Risk                        | Low Risk                     | Low Risk                             | Low Risk                       | High Risk                          |
| <b>Brensike, 1984</b>                       | Low Risk                          | Low Risk                      | Low Risk                        | Low Risk                     | Low Risk                             | Low Risk                       | Low Risk                           |
| <b>Dorr, 1978</b>                           | Low Risk                          | Low Risk                      | Low Risk                        | Low Risk                     | Low Risk                             | Unclear Risk                   | Unclear Risk                       |
| <b>Watts, 1992</b>                          | Unclear Risk                      | Unclear Risk                  | Unclear Risk                    | Unclear Risk                 | Unclear Risk                         | High Risk                      | Unclear Risk                       |
