# Supplementary material
Source: PubMed Central journal article supplement (PMC10575662)
Supplement: Appendix_3_Systematic_Reviews_Baseline_Characteristics.pdf [file Appendix_3_Systematic_Reviews_Baseline_Characteristics.pdf]

### Appendix 3: Systematic Review Baseline Characteristics

Baseline characteristics reported for intervention of interest versus appropriate control (placebo, usual care, active interventions in both arms).

Did not report baseline characteristics in network meta-analyses or systematic reviews addressing multiple interventions unless they reported the baseline characteristics pertinent to the intervention of interest.

| Intervention                  | Systematic Review (Author, Year)          | Total RCTs Included | Sample Size (n) | Gender (% Male) | Mean Age     | Proportion of Participants with CVD (%) | Baseline Cholesterol (LDL) | Proportion of Participants on Baseline Statin (%) | Included RCT Durations (weeks) | Systematic Review Funding Source | Comments |
|-------------------------------|-------------------------------------------|---------------------|-----------------|-----------------|--------------|-----------------------------------------|----------------------------|---------------------------------------------------|--------------------------------|----------------------------------|----------|
| <b>Bile acid sequestrants</b> |                                           |                     |                 |                 |              |                                         |                            |                                                   |                                |                                  |          |
| Bile Acid Sequestrants        | Hansen, 2017                              | 17                  | 2950            | NR              | Range: 51-67 | NR                                      | NR                         | NR                                                | 8-26                           | None                             |          |
| Bile Acid Sequestrants        | RCT: Lipid Research Clinics Program, 1984 | 1                   | 3806            | 100%            | 48           | NR                                      | NR                         | NR                                                | 386 (365-522)                  | Non-Industry                     |          |
| Bile Acid Sequestrants        | RCT: Brensike, 1984                       | 1                   | 143             | 81%             | 46           | NR                                      | NR                         | NR                                                | 261                            | Non-Industry                     |          |
| Bile Acid Sequestrants        | RCT: Dorr, 1978                           | 1                   | 2278            | 48%             | 54           | 26%                                     | NR                         | NR                                                | 52-157                         | NR                               |          |
| Bile Acid Sequestrants        | RCT: Watts, 1992                          | 1                   | 90              | 100%            | 49           | NR                                      | NR                         | NR                                                | 170                            | Industry                         |          |
| <b>Ezetimibe</b>              |                                           |                     |                 |                 |              |                                         |                            |                                                   |                                |                                  |          |
| Ezetimibe                     | Hong, 2018                                | 7                   | 28191           | 56-89%          | Range: 62-71 | NR                                      | NR                         | NR                                                | 48-288                         | Non-Industry                     |          |
| Ezetimibe                     | Toyota, 2019                              | 4                   | 20688           | 51-80%          | Range: 46-66 | NR                                      | 2.4-8.2 mmol/L             | 100%                                              | 42-348                         | NR                               |          |
| Ezetimibe                     | Zhan, 2018                                | 26                  | 23499           | 74%             | 63.4         | 56%                                     | 2.8 mmol/L                 | NR                                                | 265                            | Non-Industry                     |          |
| <b>Fibrates</b>               |                                           |                     |                 |                 |              |                                         |                            |                                                   |                                |                                  |          |
| Fibrates                      | Jakob, 2016                               | 6                   | 16135           | 29-100%         | 58           | 0%                                      | NR                         | NR                                                | 250                            | None                             |          |
| Fibrates                      | Keene, 2014                               | 20                  | 46099           | 86%             | 58           | NR                                      | NR                         | 18% (two studies)                                 | 266                            | None                             |          |
| Fibrates                      | Wang, 2015                                | 13                  | 16112           | NR              | NR           | 100%                                    | NR                         | NR                                                | 52-417                         | None                             |          |
| <b>Niacin</b>                 |                                           |                     |                 |                 |              |                                         |                            |                                                   |                                |                                  |          |

|                         |                     |    |                                      |          |              |        |                |            |                                   |              |  |
|-------------------------|---------------------|----|--------------------------------------|----------|--------------|--------|----------------|------------|-----------------------------------|--------------|--|
| Niacin                  | D'Andrea, 2019      | 17 | 35760                                | 43-100%  | Range: 41-73 | NR     | NR             | NR         | 24-240                            | Non-Industry |  |
| Niacin                  | Garg, 2017          | 13 | 35206                                | 81%      | 58           | NR     | 80.5-283 mg/dL | NR         | 131                               | Non-Industry |  |
| Niacin                  | Jenkins, 2021       | NR | 33103                                | NR       | NR           | NR     | NR             | NR         | NR                                | Non-Industry |  |
| Niacin                  | Riaz, 2019          | 6  | 34294                                | 48-100%  | Range 54-68  | 5-100% | NR             | 0% or 100% | 24-232                            | None         |  |
| Niacin                  | Schandelmaier, 2017 | 23 | 39195                                | NR       | Range: 33-71 | 9-89%  | NR             | 67-100%    | 24-312                            | Non-Industry |  |
| <b>Omega 3s</b>         |                     |    |                                      |          |              |        |                |            |                                   |              |  |
| Omega 3s                | Aung 2018           | 10 | 77917                                | 61%      | 64           | 66%    | NR             | NR         | 52-322                            | Non-Industry |  |
| Omega 3s                | Cabiddu, 2020       | 11 | 100609                               | NR       | NR           | NR     | NR             | NR         | NR                                | None         |  |
| Omega 3s                | Casula, 2020        | 16 | 81073                                | 43-100%  | Range 49-74  | NR     | NR             | 7-94%      | 52-364                            | None         |  |
| Omega 3s                | Gencer, 2021        | 7  | 81210 (73031 with REDUCE-IT removed) | 49-79%   | Range 62-75  | NR     | NR             | NR         | 104-385                           | Industry     |  |
| Omega 3s                | Hu, 2019            | 13 | 127477                               | 60%      | 64           | NR     | NR             | NR         | 52-385                            | Non-Industry |  |
| Omega 3s                | Khan, 2021          | 38 | 149051                               | 23%-100% | Range 39-78  | 0-100% | 1.9-4.6 mmol/L | 0-100%     | 104                               | None         |  |
| Omega 3s                | Kim, 2020           | 19 | 65819                                | NR       | NR           | NR     | NR             | NR         | NR                                | Non-Industry |  |
| Omega 3s                | Xie, 2021           | 14 | 87718                                | 59%      | 63           | NR     | NR             | NR         | 26-324                            | Non-Industry |  |
| <b>EPA only</b>         |                     |    |                                      |          |              |        |                |            |                                   |              |  |
| EPA only                | Khan, 2021          | 38 | 149051                               | 23%-100% | Range 39-78  | 0-100% | 1.9-4.6 mmol/L | 0-100%     | 104                               | None         |  |
| EPA only                | Kim, 2020           | 19 | 65819                                | NR       | NR           | NR     | NR             | NR         | NR                                | Non-Industry |  |
| <b>PCSK9 Inhibitors</b> |                     |    |                                      |          |              |        |                |            |                                   |              |  |
| PCSK9 Inhibitors        | AlTurki, 2019       | 23 | 88041                                | 62%      | Range: 50-64 | 0-97%  | 2.4-5.6 mmol/L | 0-100%     | Weighted mean: 72 (range: 24-144) | Industry     |  |
| PCSK9 Inhibitors        | Bai, 2018           | 11 | 38235                                | NR       | NR           | NR     | 2.4-5.1 mmol/L | NR         | 48-104                            | Non-Industry |  |

|                  |                   |    |       |     |              |     |           |     |                           |              |  |
|------------------|-------------------|----|-------|-----|--------------|-----|-----------|-----|---------------------------|--------------|--|
| PCSK9 Inhibitors | Bajaj, 2018       | 16 | 39104 | NR  | Range: 31-63 | NR  | NR        | NR  | NR                        | Non-Industry |  |
| PCSK9 Inhibitors | Casula, 2019      | 28 | 62281 | NR  | Range: 50-91 | NR  | NR        | NR  | 8-208                     | Non-Industry |  |
| PCSK9 Inhibitors | Chaiyasothi, 2019 | 23 | 90215 | 71% | NR           | NR  | NR        | NR  | 12-134                    | NR           |  |
| PCSK9 Inhibitors | Cordero, 2020     | 6  | 81700 | NR  | 61           | NR  | NR        | NR  | NR                        | Non-Industry |  |
| PCSK9 Inhibitors | Dicembrini, 2019  | 38 | 89603 | 56% | 59           | 45% | 112 mg/dl | NR  | Median 24 (range: 12-114) | Industry     |  |
| PCSK9 Inhibitors | Du, 2019          | 54 | 97910 | NR  | NR           | NR  | NR        | NR  | 12-146                    | Non-Industry |  |
| PCSK9 Inhibitors | Ghadban, 2017     | 6  | 60029 | 73% | 61           | NR  | NR        | NR  | 40-184                    | None         |  |
| PCSK9 Inhibitors | Guedeney, 2019    | 39 | 66478 | 54% | 61           | 21% | 128 mg/dl | NR  | 8-208                     | NR           |  |
| PCSK9 Inhibitors | Karatasakis, 2017 | 35 | 45539 | 68% | 61           | NR  | 106 mg/dl | 92% | 8-113                     | NR           |  |
| PCSK9 Inhibitors | Khan, 2022        | 5  | 80732 | NR  | NR           | NR  | NR        | NR  | NR                        | None         |  |
| PCSK9 Inhibitors | Khan, 2019        | 9  | 83321 | 66% | 60           | 70% | 107 mg/dl | 93% | 83 (range: <30-146)       | None         |  |
| PCSK9 Inhibitors | Lee, 2022         | 2  | 6281  | 73% | 65           | NR  | 93 mg/dl  | NR  | 110-146                   | Non-Industry |  |
| PCSK9 Inhibitors | Ma, 2021          | 28 | 89115 | NR  | 51-64        | NR  | NR        | NR  | 8-144                     | Non-Industry |  |
| PCSK9 Inhibitors | Monami, 2019      | 38 | 89603 | NR  | NR           | NR  | NR        | NR  | 36 (range: 12-157)        | None         |  |
| PCSK9 Inhibitors | Mu, 2020          | 32 | 57090 | NR  | 50-63        | NR  | NR        | NR  | 12-277                    | Non-Industry |  |
| PCSK9 Inhibitors | Qin, 2021         | 7  | 57440 | 72% | 63           | NR  | NR        | 72% | 52-146                    | None         |  |
| PCSK9 Inhibitors | Sagris, 2021      | 2  | 46488 | NR  | NR           | NR  | NR        | NR  | 125                       | NR           |  |
| PCSK9 Inhibitors | Talasaz, 2021     | 8  | 53255 | NR  | NR           | NR  | NR        | NR  | 52-146                    | NR           |  |

|                  |                 |     |        |         |       |      |             |    |                                   |              |                   |
|------------------|-----------------|-----|--------|---------|-------|------|-------------|----|-----------------------------------|--------------|-------------------|
| PCSK9 Inhibitors | Toyota, 2019    | 7   | 54677  | NR      | NR    | NR   | NR          | NR | 42-305                            | NR           |                   |
| PCSK9 Inhibitors | Turgeon, 2018   | 23  | 60723  | NR      | NR    | NR   | NR          | NR | 146 (range: 26-146)               | NR           |                   |
| PCSK9 Inhibitors | Wang, 2021      | 13  | 24815  | 72%     | 52-65 | NR   | NR          | NR | 24-146                            | None         |                   |
| PCSK9 Inhibitors | Zhao, 2020      | 10  | 50568  | NR      | NR    | NR   | NR          | NR | Weighted mean: 57 (range: 12-114) | Non-Industry |                   |
| PCSK9 Inhibitors | Zhao, 2019      | 29  | 67102  | NR      | 60    | 50%  | 144 mg/dl   | NR | 26                                | NR           |                   |
| PCSK9 Inhibitors | Zhu, 2019       | 20  | 67934  | NR      | NR    | NR   | NR          | NR | 12-104                            | NR           |                   |
| <b>Statins</b>   |                 |     |        |         |       |      |             |    |                                   |              |                   |
| Statins          | Byrne, 2022     | 21  | 143532 | NR      | NR    | NR   | NR          | NA | 99-317                            | NR           |                   |
| Statins          | Cai, 2021       | 62  | 120456 | 60%     | 61    | 6%   | NR          | NA | 203                               | Non-Industry |                   |
| Statins          | Davis, 2021     | 20  | 122449 | NR      | NR    | NR   | NR          | NA | NR                                | NR           |                   |
| Statins          | Domecq, 2019    | 13  | NR     | NR      | NR    | NR   | NR          | NA | 104-406                           | Non-Industry |                   |
| Statins          | Engeda, 2019    | 8   | 78039  | 64.1%   | 63.6  | NR   | 145 mg/dL   | NA | 224                               | Non-Industry |                   |
| Statins          | Fang, 2017      | 7   | 1089   | NR      | NR    | 100% | NR          | NA | NR                                | NR           | Stroke Prevention |
| Statins          | Irwin, 2018     | 135 | 192977 | NR      | NR    | NR   | NR          | NA | 2-291                             | Non-Industry |                   |
| Statins          | Khan, 2019      | 21  | 124755 | NR      | NR    | NR   | NR          | NA | NR                                | NR           |                   |
| Statins          | Kim, 2020       | NR  | NR     | NR      | NR    | NR   | NR          | NA | 52-317                            | Non-Industry |                   |
| Statins          | Koskinas, 2018  | 9   | 52847  | 78.2%   | 61    | NR   | 3.72 mmol/L | NA | Weighted mean/median=250          | NR           |                   |
| Statins          | Liang, 2018     | 16  | 74078  | 48-100% | 53-75 | NR   | NR          | NA | 12-317                            | NR           |                   |
| Statins          | Li, 2019        | 16  | 69159  | NR      | NR    | NR   | NR          | NA | Median: 177                       | Non-Industry |                   |
| Statins          | Manktelow, 2009 | 5   | NR     | NR      | NR    | NR   | NR          | NA | 12-312                            | NR           | Stroke Prevention |
| <b>Statins</b>   | Milionis, 2020  | 4   | 35622  | NR      | NR    | NR   | NR          | NA | NR                                | NR           | Stroke Prevention |

|                |                 |    |        |         |       |       |                  |    |                                                       |              |                         |
|----------------|-----------------|----|--------|---------|-------|-------|------------------|----|-------------------------------------------------------|--------------|-------------------------|
| <b>Statins</b> | Palmer, 2014    | 47 | 39738  | NR      | NR    | NR    | 225mg/dL         | NA | 8-287                                                 | NR           | Chronic Kidney Disease  |
| <b>Statins</b> | Ponce, 2019     | 17 | 50322  | NR      | NR    | NR    | NR               | NA | Statins: Primary prevention: 52-416; secondary 12-588 | Non-Industry |                         |
| <b>Statins</b> | Riaz, 2017      | 22 | 129680 | NR      | NR    | NR    | NR               | NA | 213                                                   | NR           |                         |
| <b>Statins</b> | Sandwith, 2021  | 13 | 88876  | NR      | NR    | NR    | NR               | NA | NR                                                    | NR           |                         |
| <b>Statins</b> | Singh, 2020     | 11 | 58504  | NR      | NR    | NR    | NR               | NA | 99-291                                                | NR           |                         |
| <b>Statins</b> | Squizzato 2011  | 8  | 625    | NR      | NR    | NR    | NR               | NA | NR                                                    | Non-Industry | Stroke Prevention       |
| <b>Statins</b> | Taylor, 2013    | 18 | 56934  | 60.3%   | 57    | <10%  | Median 4.1mmol/L | NA | 52-276                                                | Non-Industry |                         |
| <b>Statins</b> | Tramacere, 2019 | 10 | 10741  | 44-96%  | 63-74 | NR    | NR               | NA | 130                                                   | Non-Industry | Stroke Prevention       |
| <b>Statins</b> | Vale, 2014      | 18 | 14303  | 59-88%  | 53-69 | NR    | 3.1mmol/L        | NA | NR                                                    | Non-industry | Acute Coronary Syndrome |
| <b>Statins</b> | Villani, 2019   | 73 | 123051 | NR      | NR    | NR    | NR               | NA | 4-281                                                 | None         |                         |
| <b>Statins</b> | Wang, 2017      | 14 | 95102  | 32-100% | 55-76 | NR    | NR               | NA | 99-313                                                | Non-industry |                         |
| <b>Statins</b> | Yebyo, 2019     | 40 | 94283  | 61%     | 58.3  | NR    | 155mg/dL         | NA | 4-1040                                                | Non-industry |                         |
| <b>Statins</b> | Yin, 2022       | 11 | 11749  | NR      | NR    | NR    | NR               | NA | 5 days-260 weeks                                      | Non-industry | Stroke Prevention       |
| <b>Statins</b> | Zhao, 2019      | NR | NR     | NR      | 61.3  | 62.5% | 141.7mg/d L      | NA | 182                                                   | NR           |                         |
| <b>Statins</b> | Zhong, 2017     | 32 | NR     | NR      | NR    | NR    | NR               | NA | 24-317                                                | NR           | Stroke Prevention       |
| <b>Statins</b> | Zhou, 2020      | 11 | 18192  | 57%     | 73.7  | NR    | NR               | NA | 52-271                                                | None         |                         |

RCT=Randomized Controlled Trial; n= total sample size; CVD= cardiovascular disease; LDL= Low Density Lipoprotein; NR= Not Reported
