# Supplementary material
Source: PubMed Central journal article supplement (PMC10575662)
Supplement: Appendix_4_Primary_and_Secondary_Outcomes_In_Overall_Population.pdf [file Appendix_4_Primary_and_Secondary_Outcomes_In_Overall_Population.pdf]

## Appendix 4. Overall Results

**Table 1. Primary Outcome: Major Adverse Cardiac Events (MACE)**

| Treatment                           | Primary Prevention or Mixed (Primary + Secondary) | MACE Definition                                                                                | Systematic Review (Author, Year)          | RCTs included | Sample Size (n) | Outcome Measured at (weeks) | Point Estimate (OR, RR, HR) | 95% CI    | Random or fixed effects analysis? | I <sup>2</sup> |
|-------------------------------------|---------------------------------------------------|------------------------------------------------------------------------------------------------|-------------------------------------------|---------------|-----------------|-----------------------------|-----------------------------|-----------|-----------------------------------|----------------|
| <b>Bile acid sequestrants (BAS)</b> |                                                   |                                                                                                |                                           |               |                 |                             |                             |           |                                   |                |
| <b>BAS</b>                          | Primary                                           | “definite coronary heart disease death and/or nonfatal myocardial infarction”                  | RCT: Lipid Research Clinics Program, 1984 | 1             | 3806            | 386                         | RR 0.83*                    | 0.67-1.01 | N/A                               | N/A            |
| <b>BAS</b>                          | Secondary                                         | “death, myocardial infarction, coronary artery disease progression or both MI and progression” | RCT: Brensike, 1984                       | 1             | 143             | 261                         | OR 0.60                     | 0.30-1.21 | N/A                               | N/A            |
| <b>BAS</b>                          | Mixed                                             | “total cardiac events- deaths, non, fatal MI, coronary surgery, angioplasty, and stroke”       | RCT: Watts, 1992                          | 1             | 53              | 170                         | RR 0.35*                    | 0.04-3.12 | N/A                               | N/A            |
| <b>Ezetimibe</b>                    |                                                   |                                                                                                |                                           |               |                 |                             |                             |           |                                   |                |

|                  |           |                                                                                                            |              |    |       |         |         |           |        |      |
|------------------|-----------|------------------------------------------------------------------------------------------------------------|--------------|----|-------|---------|---------|-----------|--------|------|
| <b>Ezetimibe</b> | Mixed     | “Varied between studies, with coronary revascularization included in most studies”                         | Hong, 2018   | 6  | 18921 | 48-288  | RR 0.93 | 0.89-0.99 | Random | 0.9% |
| <b>Ezetimibe</b> | Mixed     | composite of coronary heart death, nonfatal MI, stroke or coronary revascularization                       | Toyota, 2019 | 4  | 20688 | NR      | OR 0.90 | 0.85-0.96 | Random | 35%  |
| <b>Ezetimibe</b> | Mixed     | CV death non-fatal MI, non-fatal stroke, hospitalization for unstable angina or coronary revascularisation | Zhan, 2018   | 10 | 21727 | 52-312  | RR 0.94 | 0.90-0.98 | Fixed  | 0%   |
| <b>Fibrates</b>  |           |                                                                                                            |              |    |       |         |         |           |        |      |
| <b>Fibrates</b>  | Primary   | “Combined CVD death, non-fatal MI, non-fatal stroke”                                                       | Jakob, 2016  | 6  | 16135 | 104-261 | RR 0.84 | 0.74-0.96 | Fixed  | 0%   |
| <b>Fibrates</b>  | Secondary | “Composite outcome of non-fatal stroke, non-fatal MI and vascular death”                                   | Wang, 2015   | 12 | 16064 | 271     | RR 0.88 | 0.81-0.97 | Random | 45%  |
| <b>Niacin</b>    |           |                                                                                                            |              |    |       |         |         |           |        |      |

|                           |       |                                                                                                                                                |                |    |        |    |         |            |        |     |
|---------------------------|-------|------------------------------------------------------------------------------------------------------------------------------------------------|----------------|----|--------|----|---------|------------|--------|-----|
| <b>Niacin</b>             | Mixed | “Overall deaths from coronary heart disease, nonfatal myocardial infarction, hospitalization for angina, stroke, revascularization procedures” | D’Andrea, 2019 | 17 | 10295  | NR | RR 0.88 | 0.76- 1.01 | Random | 45% |
| <b>Niacin</b>             | Mixed | “Total CVD”                                                                                                                                    | Jenkins 2021   | 4  | 29254  | NR | RR 0.97 | 0.91-1.03  | Random | 55% |
| <b>Omega 3s (EPA+DHA)</b> |       |                                                                                                                                                |                |    |        |    |         |            |        |     |
| <b>Omega 3s</b>           | Mixed | “Major vascular events (first occurrence nonfatal MI, death caused by CHD, nonfatal or fatal stroke, any revascularization procedure”          | Aung, 2018     | 9  | 59195  | NR | RR 0.98 | 0.94-1.02  | NR     | NR  |
| <b>Omega 3s</b>           | Mixed | NR                                                                                                                                             | Casula, 2020   | 13 | 54011  | NR | OR 0.96 | 0.88-1.04  | NR     | NR  |
| <b>Omega 3s</b>           | Mixed | NR                                                                                                                                             | Khan, 2021     | 13 | 107714 | NR | RR 0.99 | 0.95-1.02  | Random | NR  |
| <b>EPA only</b>           |       |                                                                                                                                                |                |    |        |    |         |            |        |     |
| <b>EPA</b>                | Mixed | NR                                                                                                                                             | Khan, 2021     | 4  | 27305  | NR | RR 0.78 | 0.72-0.85  | Random | NR  |
| <b>PCSK9 inhibitors</b>   |       |                                                                                                                                                |                |    |        |    |         |            |        |     |
| <b>PCSK9 Inhibitors</b>   | Mixed | “CV death, nonfatal MI, and nonfatal stroke”                                                                                                   | AlTurki, 2019  | 22 | NR     | NR | OR 0.82 | 0.77-0.87  | Random | 0%  |
| <b>PCSK9 Inhibitors</b>   | Mixed | “CV Events”                                                                                                                                    | Bai, 2018      | 11 | 38226  | NR | RR 0.86 | 0.81-0.92  | Fixed  | 0%  |

|                         |       |                                                                             |                  |    |       |        |         |           |        |     |
|-------------------------|-------|-----------------------------------------------------------------------------|------------------|----|-------|--------|---------|-----------|--------|-----|
| <b>PCSK9 Inhibitors</b> | Mixed | “Cardiovascular event incidence”                                            | Casula, 2019     | 20 | 60878 | NR     | OR 0.83 | 0.78-0.87 | Random | NR  |
| <b>PCSK9 Inhibitors</b> | Mixed | “CV mortality, nonfatal MI, nonfatal stroke”                                | Dicembrini, 2019 | 27 | 84233 | NR     | OR 0.83 | 0.78-0.88 | Random | 0%  |
| <b>PCSK9 Inhibitors</b> | Mixed | “CV death, non-fatal MI, and non-fatal stroke”                              | Du, 2019         | 31 | 92736 | 12-146 | RR 0.84 | 0.79-0.89 | Fixed  | 0%  |
| <b>PCSK9 Inhibitors</b> | Mixed | NR                                                                          | Ghadban, 2017    | 6  | 62776 | NR     | RR 0.81 | 0.70-0.93 | Random | 56% |
| <b>PCSK9 Inhibitors</b> | Mixed | NR                                                                          | Khan, 2022       | 5  | 80732 | 26-146 | RR 0.84 | 0.76-0.92 | Random | NR  |
| <b>PCSK9 Inhibitors</b> | Mixed | “CV death, stroke and MI”                                                   | Ma, 2021         | 20 | 86845 | NR     | RR 0.83 | 0.79-0.88 | Fixed  | 9%  |
| <b>PCSK9 Inhibitors</b> | Mixed | “CV death, nonfatal MI, nonfatal stroke”                                    | Monami, 2019     | 3  | 47208 | NR     | OR 0.78 | 0.71-0.85 | Random | 37% |
| <b>PCSK9 Inhibitors</b> | Mixed | “Major CV Events”                                                           | Mu, 2020         | 15 | NR    | NR     | RR 0.87 | 0.83-0.91 | Random | NR  |
| <b>PCSK9 Inhibitors</b> | Mixed | “Coronary heart death, non-fatal MI, stroke, or coronary revascularization” | Toyota, 2019     | 7  | 54677 | NR     | OR 0.81 | 0.73-0.90 | Random | 37% |
| <b>PCSK9 Inhibitors</b> | Mixed | Based on the individual trial definitions                                   | Turgeon, 2018    | 21 | 59852 | NR     | RR 0.83 | 0.78-0.88 | Fixed  | 2%  |
| <b>PCSK9 Inhibitors</b> | Mixed | “CV Events”                                                                 | Wang, 2021       | 13 | 24803 | NR     | RR 0.89 | 0.83-0.95 | Fixed  | 0%  |
| <b>PCSK9 Inhibitors</b> | Mixed | “Adjudicated CV events”                                                     | Zhao, 2020       | 8  | 49227 | NR     | RR 0.87 | 0.83-0.91 | Fixed  | 0%  |
| <b>PCSK9 Inhibitors</b> | Mixed | “CV Events”                                                                 | Zhao, 2019       | NR | 62714 | NR     | OR 0.79 | 0.68-0.92 | Random | NR  |

|                         |         |                                                                                                                                                       |                |    |       |        |         |           |        |       |
|-------------------------|---------|-------------------------------------------------------------------------------------------------------------------------------------------------------|----------------|----|-------|--------|---------|-----------|--------|-------|
| <b>PCSK9 Inhibitors</b> | Mixed   | “Positively adjudicated CV events (composite of all-cause mortality, CV death, MI, stroke, revascularization, or hospitalization for unstable angina” | Zhu, 2019      | 15 | 35011 | NR     | RR 0.87 | 0.81-0.93 | Random | 0%    |
| <b>Statins</b>          |         |                                                                                                                                                       |                |    |       |        |         |           |        |       |
| <b>Statins</b>          | Primary | “Any coronary heart events” (angina, MI, coronary revascularization, CHD death)                                                                       | Li, 2019       | 8  | 37395 | 52-276 | RR 0.73 | 0.68-0.78 | Fixed  | 0%    |
| <b>Statins</b>          | Mixed   | “Coronary Artery Disease”                                                                                                                             | Ponce, 2019    | 10 | 24728 | NR     | RR 0.71 | 0.63-0.80 | Random | 52%   |
| <b>Statins</b>          | Primary | “All CHD events” – 13 outcomes, see PDF (pg 3), excludes stroke                                                                                       | Sandwith, 2021 | 13 | 88876 | NR     | RR 0.78 | 0.71-0.85 | Random | 71%   |
| <b>Statins</b>          | Primary | Primary endpoint for each RCT (Appendix pg 21)                                                                                                        | Singh, 2020    | 11 | 58504 | NR     | RR 0.71 | 0.62-0.82 | Random | 55%   |
| <b>Statins</b>          | Primary | “Fatal and non-fatal CVD”                                                                                                                             | Taylor, 2013   | 9  | 23805 | NR     | RR 0.75 | 0.70-0.81 | Fixed  | 31%   |
| <b>Statins</b>          | Primary | “Non-fatal stroke, unstable angina,                                                                                                                   | Yebyo, 2013    | 23 | NR    | NR     | RR 0.74 | 0.67-0.81 | Random | 49.5% |

|                |       |                                    |            |    |        |    |         |           |        |    |
|----------------|-------|------------------------------------|------------|----|--------|----|---------|-----------|--------|----|
|                |       | non-fatal MI and CV death”         |            |    |        |    |         |           |        |    |
| <b>Statins</b> | Mixed | “CV events” (not defined in paper) | Zhao, 2019 | NR | 139233 | NR | OR 0.80 | 0.76-0.85 | Random | NR |

BAS: Bile Acid Sequestrants; \*Calculated by PEER team at [https://www.medcalc.org/calc/relative\\_risk.php](https://www.medcalc.org/calc/relative_risk.php); RCT: Randomized Controlled Trial; n: Total sample size in meta-analysis; OR: Odds Ratio; RR: Risk Ratio; HR= Hazard Ratio; CI: Confidence Interval; I<sup>2</sup>: indicates the level of heterogeneity; CVD: Cardiovascular Disease; NR: Not Reported; ACS: Acute coronary syndrome; US

**Table 2. Secondary Outcome: Cardiovascular Mortality**

| Treatment                           | Primary Prevention or Mixed (Primary + Secondary) | Systematic Review (Author, Year)           | RCTs included | Sample Size (n) | Outcome Measured at (weeks) | Point Estimate (OR, RR, HR) | 95% CI    | Random or fixed effects analysis? | I <sup>2</sup> |
|-------------------------------------|---------------------------------------------------|--------------------------------------------|---------------|-----------------|-----------------------------|-----------------------------|-----------|-----------------------------------|----------------|
| <b>Bile acid sequestrants (BAS)</b> |                                                   |                                            |               |                 |                             |                             |           |                                   |                |
| <b>BAS</b>                          | Primary                                           | RCT: Lipids Research Clinics Program, 1984 | 1             | 3806            | 386                         | RR 0.79*                    | 0.49-1.26 | N/A                               | N/A            |
| <b>BAS</b>                          | Mixed-MEN                                         | RCT: Dorr, 1978                            | 1             | 1094            | 52-157                      | RR 0.46*                    | 0.23-0.92 | N/A                               | N/A            |
| <b>BAS</b>                          | Mixed-WOMEN                                       | RCT: Dorr, 1978                            | 1             | 1184            | 52-157                      | RR 1.08*                    | 0.44-2.63 | N/A                               | N/A            |
| <b>Ezetimibe</b>                    |                                                   |                                            |               |                 |                             |                             |           |                                   |                |
| <b>Ezetimibe</b>                    | Mixed                                             | Toyota, 2019                               | 3             | 18967           | NR                          | OR 1.00                     | 0.89-1.13 | Random                            | 0%             |
| <b>Ezetimibe</b>                    | Mixed                                             | Zhan, 2018                                 | 6             | 19457           | 52-312                      | RR 1.00                     | 0.89-1.12 | Fixed                             | 0%             |
| <b>Fibrates</b>                     |                                                   |                                            |               |                 |                             |                             |           |                                   |                |
| <b>Fibrates</b>                     | Secondary                                         | Wang, 2015                                 | 10            | 13653           | 282                         | RR 0.95                     | 0.86-1.05 | Fixed                             | 11%            |
| <b>Niacin</b>                       |                                                   |                                            |               |                 |                             |                             |           |                                   |                |
| <b>Niacin</b>                       | Mixed                                             | D'Andrea, 2019                             | 16            | 35652           | NR                          | RR 0.98                     | 0.90-1.07 | Random                            | 0%             |
| <b>Niacin</b>                       | Mixed                                             | Garg, 2017                                 | 9             | 9236            | NR                          | RR 0.91                     | 0.81-1.02 | Random                            | 0.1%           |
| <b>Niacin</b>                       | Mixed                                             | Jenkins, 2021                              | 2             | 3581            | NR                          | RR 1.14                     | 0.75-1.73 | Random                            | 0%             |
| <b>Niacin</b>                       | Mixed                                             | Riaz, 2019                                 | 4             | 32733           | NR                          | RR 0.99                     | 0.89-1.09 | Random                            | NR             |
| <b>Niacin</b>                       | Mixed                                             | Schandelmaier, 2017                        | 5             | 32966           | 52-260                      | RR 1.02                     | 0.93-1.12 | Random                            | 0%             |
| <b>Omega 3s</b>                     |                                                   |                                            |               |                 |                             |                             |           |                                   |                |
| <b>Omega 3s</b>                     | Mixed                                             | Cabiddu, 2020                              | 11            | 100609          | NR                          | RR 0.94                     | 0.89-0.99 | NR                                | 0%             |
| <b>Omega 3s</b>                     | Mixed                                             | Hu, 2019                                   | 11            | 100599          | NR                          | RR 0.93                     | 0.88-0.99 | Fixed                             | 0.2%           |
| <b>Omega 3s</b>                     | Mixed                                             | Khan, 2021                                 | 22            | 116452          | NR                          | RR 0.94                     | 0.89-0.99 | Random                            | NR             |

|                         |         |                   |    |       |        |         |           |        |       |
|-------------------------|---------|-------------------|----|-------|--------|---------|-----------|--------|-------|
| <b>Omega 3s</b>         | Mixed   | Kim, 2020         | 13 | NR    | 52-385 | RR 0.93 | 0.88-0.99 | Random | 10%   |
| <b>Omega 3s</b>         | Mixed   | Xie, 2021         | 8  | 49872 | NR     | RR 0.93 | 0.88-0.99 | Fixed  | 0%    |
| <b>EPA only</b>         |         |                   |    |       |        |         |           |        |       |
| <b>EPA</b>              | Mixed   | Khan, 2021        | 3  | 27062 | NR     | RR 0.82 | 0.68-0.99 | Random | NR    |
| <b>EPA</b>              | Mixed   | Kim, 2020         | 1  | 8159  | NR     | RR 0.82 | 0.67-0.99 | NR     | NR    |
| <b>PCSK9 Inhibitors</b> |         |                   |    |       |        |         |           |        |       |
| <b>PCSK9 Inhibitors</b> | Mixed   | AlTurki, 2019     | 13 | NR    | NR     | OR 0.95 | 0.84-1.07 | Random | 0%    |
| <b>PCSK9 Inhibitors</b> | Mixed   | Bai, 2018         | 7  | 36476 | NR     | RR 1.00 | 0.84-1.18 | Fixed  | 5.2%  |
| <b>PCSK9 Inhibitors</b> | Mixed   | Casula, 2019      | 10 | 57306 | NR     | OR 0.94 | 0.83-1.07 | Random | NR    |
| <b>PCSK9 Inhibitors</b> | Mixed   | Chaiyasothi, 2019 | 11 | 85021 | NR     | RR 0.97 | 0.86-1.08 | Random | 0%    |
| <b>PCSK9 Inhibitors</b> | Mixed   | Dicembrini, 2019  | 36 | 85521 | NR     | OR 0.97 | 0.86-1.09 | Random | 0%    |
| <b>PCSK9 Inhibitors</b> | Mixed   | Du, 2019          | 57 | 96709 | 12-146 | RR 0.95 | 0.85-1.07 | Random | 0%    |
| <b>PCSK9 Inhibitors</b> | Mixed   | Ghadban, 2017     | 6  | 62776 | NR     | RR 0.98 | 0.78-1.22 | Random | 15%   |
| <b>PCSK9 Inhibitors</b> | Mixed   | Guedeney, 2019    | NR | 64707 | 8-208  | RR 0.94 | 0.84-1.06 | Random | 0%    |
| <b>PCSK9 Inhibitors</b> | Mixed   | Karatasakis, 2017 | 34 | 44701 | NR     | OR 1.01 | 0.85-1.19 | Random | 0%    |
| <b>PCSK9 Inhibitors</b> | Mixed   | Khan, 2022        | 5  | 80732 | 26-146 | RR 0.95 | 0.80-1.12 | Random | NR    |
| <b>PCSK9 Inhibitors</b> | Mixed   | Khan, 2019        | 9  | 83318 | NR     | RR 0.95 | 0.85-1.07 | Random | NR    |
| <b>PCSK9 Inhibitors</b> | Mixed   | Ma, 2021          | 13 | 84639 | NR     | RR 0.96 | 0.86-1.07 | Fixed  | 0%    |
| <b>PCSK9 Inhibitors</b> | Mixed   | Mu, 2020          | 6  | NR    | NR     | RR 0.93 | 0.79-1.11 | Random | NR    |
| <b>PCSK9 Inhibitors</b> | Mixed   | Qin, 2021         | 7  | 57436 | NR     | RR 0.95 | 0.84-1.07 | Fixed  | 2.5%  |
| <b>PCSK9 Inhibitors</b> | Mixed   | Toyota, 2019      | 6  | 53709 | NR     | OR 0.92 | 0.73-1.15 | Random | 47%   |
| <b>PCSK9 Inhibitors</b> | Mixed   | Turgeon, 2018     | 19 | 58021 | NR     | RR 0.95 | 0.84-1.07 | Fixed  | 0%    |
| <b>PCSK9 Inhibitors</b> | Mixed   | Wang, 2021        | 4  | 20570 | NR     | RR 0.87 | 0.74-1.04 | Fixed  | 0%    |
| <b>PCSK9 Inhibitors</b> | Mixed   | Zhao, 2020        | 6  | 48060 | NR     | RR 0.96 | 0.85-1.08 | Fixed  | 0%    |
| <b>PCSK9 Inhibitors</b> | Mixed   | Zhao, 2019        | NR | 63501 | NR     | OR 0.99 | 0.87-1.13 | Random | NR    |
| <b>PCSK9 Inhibitors</b> | Mixed   | Zhu, 2019         | 12 | 64323 | NR     | RR 1.01 | 0.87-1.18 | Random | 0%    |
| <b>Statins</b>          |         |                   |    |       |        |         |           |        |       |
| <b>Statins</b>          | Mixed   | Kim, 2020         | 27 | 97648 | 52-317 | RR 0.86 | 0.80-0.92 | Random | 37.2% |
| <b>Statins</b>          | Primary | Cai, 2021         | 22 | 95959 | 230    | OR 0.83 | 0.76-0.91 | Fixed  | 27%   |
| <b>Statins</b>          | Primary | Li, 2019          | 6  | 38935 | NR     | RR 0.85 | 0.74-0.99 | Fixed  | 22%   |



|                |         |              |    |        |        |         |           |        |       |
|----------------|---------|--------------|----|--------|--------|---------|-----------|--------|-------|
| <b>Statins</b> | Mixed   | Ponce, 2019  | 12 | 35955  | 52-346 | RR 0.85 | 0.76-0.96 | Fixed  | 49.3% |
| <b>Statins</b> | Primary | Singh, 2020  | 8  | 54515  | 99-291 | RR 0.90 | 0.78-1.04 | Random | 0%    |
| <b>Statins</b> | Primary | Taylor, 2013 | 5  | 34012  | NR     | RR 0.83 | 0.72-0.96 | Fixed  | 0%    |
| <b>Statins</b> | Primary | Yebyo, 2019  | 15 | NR     | NR     | RR 0.80 | 0.71-0.91 | Random | 35.3% |
| <b>Statins</b> | Mixed   | Zhao, 2019   | NR | 134059 | NR     | OR 0.83 | 0.75-0.92 | Random | NR    |

BAS: Bile Acid Sequestrants; \*Calculated by PEER team at [https://www.medcalc.org/calc/relative\\_risk.php](https://www.medcalc.org/calc/relative_risk.php); RCT: Randomized Controlled Trial; n: Total sample size in meta-analysis; OR: Odds Ratio; RR: Risk Ratio; CI: Confidence Interval; I<sup>2</sup>: indicates the level of heterogeneity; NR= Not Reported

**Table 3. Secondary Outcome: All-Cause Mortality**

| Treatment                           | Primary Prevention or Mixed (Primary + Secondary) | Systematic Review (Author, Year)           | RCTs included | Sample Size (n) | Outcome Measured at (weeks) | Point Estimate (OR, RR, HR) | 95% CI    | Random or fixed effects analysis? | I <sup>2</sup> |
|-------------------------------------|---------------------------------------------------|--------------------------------------------|---------------|-----------------|-----------------------------|-----------------------------|-----------|-----------------------------------|----------------|
| <b>Bile acid sequestrants (BAS)</b> |                                                   |                                            |               |                 |                             |                             |           |                                   |                |
| <b>BAS</b>                          | Primary                                           | RCT: Lipids Research Clinics Program, 1984 | 1             | 3806            | 386                         | RR 0.95*                    | 0.69-1.32 | N/A                               | N/A            |
| <b>BAS</b>                          | Mixed-MEN                                         | RCT: Dorr, 1978                            | 1             | 1094            | 52-157                      | RR 0.63*                    | 0.35-1.14 | N/A                               | N/A            |
| <b>BAS</b>                          | Mixed-WOMEN                                       | RCT: Dorr, 1978                            | 1             | 1184            | 52-157                      | RR 0.92*                    | 0.50-1.69 | N/A                               | N/A            |
| <b>BAS</b>                          | Mixed                                             | RCT: Watts, 1992                           | 1             | 53              | 170                         | RR 0.35*                    | 0.01-8.12 | N/A                               | N/A            |
| <b>Ezetimibe</b>                    |                                                   |                                            |               |                 |                             |                             |           |                                   |                |
| <b>Ezetimibe</b>                    | Mixed                                             | Toyota, 2019                               | 3             | 19968           | NR                          | OR 0.88                     | 0.62-1.27 | Random                            | 54%            |
| <b>Ezetimibe</b>                    | Mixed                                             | Zhan, 2018                                 | 8             | 21222           | 52-312                      | RR 0.98                     | 0.91-1.05 | Fixed                             | 0%             |
| <b>Fibrates</b>                     |                                                   |                                            |               |                 |                             |                             |           |                                   |                |
| <b>Fibrates</b>                     | Primary                                           | Jakob, 2016                                | 5             | 8471            | 52-261                      | RR 1.01                     | 0.81-1.26 | Fixed                             | 0%             |
| <b>Fibrates</b>                     | Mixed                                             | Keene, 2014                                | 19            | 45935           | 261                         | OR 0.98                     | 0.89-1.08 | Random                            | 33%            |
| <b>Fibrates</b>                     | Secondary                                         | Wang, 2015                                 | 10            | 13653           | 282                         | RR 0.98                     | 0.91-1.06 | Fixed                             | 23%            |
| <b>Niacin</b>                       |                                                   |                                            |               |                 |                             |                             |           |                                   |                |
| <b>Niacin</b>                       | Mixed                                             | Garg, 2017                                 | 11            | 34810           | NR                          | RR 0.99                     | 0.88-1.12 | Random                            | 31%            |
| <b>Niacin</b>                       | Mixed                                             | Jenkins, 2021                              | 4             | 29195           | NR                          | RR 1.04                     | 0.95-1.14 | Random                            | 16%            |
| <b>Niacin</b>                       | Mixed                                             | Riaz, 2019                                 | 5             | 33305           | NR                          | RR 1.04                     | 0.97-1.12 | Random                            | NR             |
| <b>Niacin</b>                       | Mixed                                             | Schandelmaier, 2017                        | 12            | 35543           | 26-260                      | RR 1.05                     | 0.97-1.12 | Random                            | 0%             |
| <b>Omega 3s</b>                     |                                                   |                                            |               |                 |                             |                             |           |                                   |                |
| <b>Omega 3s</b>                     | Mixed                                             | Khan, 2021                                 | 21            | 113921          | NR                          | RR 0.98                     | 0.93-1.03 | Random                            | NR             |

|                         |         |                   |    |        |        |         |           |        |       |
|-------------------------|---------|-------------------|----|--------|--------|---------|-----------|--------|-------|
| <b>Omega 3s</b>         | Mixed   | Kim, 2020         | 17 | NR     | 52-385 | RR 0.97 | 0.94-1.00 | Random | 2.2%  |
| <b>EPA Only</b>         |         |                   |    |        |        |         |           |        |       |
| <b>EPA</b>              | Mixed   | Khan, 2021        | 3  | 27062  | NR     | RR 0.96 | 0.85-1.10 | NR     | NR    |
| <b>EPA</b>              | Mixed   | Kim, 2020         | 2  | 26804  | NR     | RR 0.98 | 0.81-1.18 | NR     | 6%    |
| <b>PCSK9 Inhibitors</b> |         |                   |    |        |        |         |           |        |       |
| <b>PCSK9 Inhibitors</b> | Mixed   | AlTurki, 2019     | 17 | NR     | NR     | OR 0.91 | 0.78-1.06 | Random | 21%   |
| <b>PCSK9 Inhibitors</b> | Mixed   | Bai, 2018         | NR | NR     | NR     | RR 1.00 | 0.89-1.14 | NR     | NR    |
| <b>PCSK9 Inhibitors</b> | Mixed   | Casula, 2019      | 13 | 59504  | NR     | OR 0.93 | 0.85-1.03 | Random | NR    |
| <b>PCSK9 Inhibitors</b> | Mixed   | Chaiyasothi, 2019 | 12 | 84092  | NR     | RR 0.94 | 0.82-1.06 | Random | 13.8% |
| <b>PCSK9 Inhibitors</b> | Mixed   | Cordero, 2020     | 6  | 81696  | NR     | OR 0.95 | 0.86-1.04 | NR     | 55.1% |
| <b>PCSK9 Inhibitors</b> | Mixed   | Dicembrini, 2019  | 38 | 85230  | NR     | OR 0.94 | 0.84-1.04 | Random | 3%    |
| <b>PCSK9 Inhibitors</b> | Mixed   | Du, 2019          | 57 | 96427  | 12-146 | RR 0.93 | 0.84-1.03 | Random | 3%    |
| <b>PCSK9 Inhibitors</b> | Mixed   | Ghadban, 2017     | 6  | 62776  | NR     | RR 1.01 | 0.86-1.20 | Random | 21%   |
| <b>PCSK9 Inhibitors</b> | Mixed   | Guedeney, 2019    | NR | 66478  | 8-208  | RR 0.89 | 0.75-1.04 | Random | 13%   |
| <b>PCSK9 Inhibitors</b> | Mixed   | Karatasakis, 2017 | 35 | 45503  | NR     | OR 0.71 | 0.47-1.09 | Random | 18%   |
| <b>PCSK9 Inhibitors</b> | Mixed   | Khan, 2022        | 5  | 80732  | 26-146 | RR 0.91 | 0.75-1.10 | Random | NR    |
| <b>PCSK9 Inhibitors</b> | Mixed   | Khan, 2019        | 9  | 83318  | NR     | RR 0.94 | 0.81-1.09 | Random | NR    |
| <b>PCSK9 Inhibitors</b> | Mixed   | Monami, 2019      | 3  | 1234   | NR     | OR 0.43 | 0.14-1.29 | Random | 0%    |
| <b>PCSK9 Inhibitors</b> | Mixed   | Mu, 2020          | 13 | NR     | NR     | RR 0.88 | 0.72-1.07 | Random | NR    |
| <b>PCSK9 Inhibitors</b> | Mixed   | Toyota, 2019      | 7  | 54677  | NR     | OR 0.87 | 0.69-1.10 | Random | 53%   |
| <b>PCSK9 Inhibitors</b> | Mixed   | Turgeon, 2018     | 23 | 60724  | NR     | RR 0.93 | 0.85-1.02 | Fixed  | 19%   |
| <b>PCSK9 Inhibitors</b> | Mixed   | Wang, 2021        | 13 | 24773  | NR     | RR 0.80 | 0.66-0.96 | Fixed  | 11%   |
| <b>PCSK9 Inhibitors</b> | Mixed   | Zhao, 2020        | 8  | 49227  | NR     | RR 0.95 | 0.86-1.05 | Fixed  | 22%   |
| <b>PCSK9 Inhibitors</b> | Mixed   | Zhao, 2019        | NR | 60169  | NR     | OR 0.87 | 0.71-1.07 | Random | NR    |
| <b>Statins</b>          |         |                   |    |        |        |         |           |        |       |
| <b>Statins</b>          | Mixed   | Byrne, 2022       | 19 | 132763 | NR     | RR 0.91 | 0.86-0.95 | Random | 52%   |
| <b>Statins</b>          | Mixed   | Kim, 2020         | 30 | 138877 | 52-317 | RR 0.90 | 0.86-0.94 | Random | 43.8% |
| <b>Statins</b>          | Primary | Li, 2019          | 9  | 53656  | 52-276 | RR 0.88 | 0.76-1.01 | Random | 58%   |
| <b>Statins</b>          | Mixed   | Ponce, 2019       | 17 | 47083  | 52-346 | RR 0.92 | 0.87-0.97 | Random | 20%   |
| <b>Statins</b>          | Primary | Sandwith, 2021    | 13 | 88876  | NR     | RR 0.93 | 0.89-0.97 | Fixed  | 6%    |

|                |         |              |    |        |        |         |           |        |     |
|----------------|---------|--------------|----|--------|--------|---------|-----------|--------|-----|
| <b>Statins</b> | Primary | Singh, 2020  | 11 | 58504  | 99-291 | RR 0.92 | 0.83-1.02 | Random | 25% |
| <b>Statins</b> | Primary | Taylor, 2013 | 13 | 48060  | 260    | OR 0.86 | 0.79-0.94 | Fixed  | 0%  |
| <b>Statins</b> | Primary | Yebyo, 2019  | 24 | NR     | NR     | RR 0.89 | 0.85-0.93 | Random | 0%  |
| <b>Statins</b> | Mixed   | Zhao, 2019   | NR | 143995 | NR     | OR 0.91 | 0.86-0.96 | Random | 0%  |

BAS: Bile Acid Sequestrants; \*Calculated by PEER team at [https://www.medcalc.org/calc/relative\\_risk.php](https://www.medcalc.org/calc/relative_risk.php); RCT: Randomized Controlled Trial; n: Total sample size in meta-analysis; OR: Odds Ratio; RR: Risk Ratio; CI: Confidence Interval; I<sup>2</sup>: indicates the level of heterogeneity; NR= Not Reported

**Table 4. Secondary Outcome: Myocardial Infarction**

| Treatment                              | Primary Prevention or Mixed (Primary + Secondary) | Systematic Review (Author, Year)          | RCTs included | Sample Size (n) | Outcome Measured at (weeks) | Point Estimate (OR, RR, HR) | 95% CI     | Random or fixed effects analysis? | I <sup>2</sup> |
|----------------------------------------|---------------------------------------------------|-------------------------------------------|---------------|-----------------|-----------------------------|-----------------------------|------------|-----------------------------------|----------------|
| <b>NON-FATAL MYOCARDIAL INFARCTION</b> |                                                   |                                           |               |                 |                             |                             |            |                                   |                |
| <b>Bile acid sequestrants (BAS)</b>    |                                                   |                                           |               |                 |                             |                             |            |                                   |                |
| BAS                                    | Primary                                           | RCT: Lipid Research Clinics Program, 1984 | 1             | 3806            | 386                         | RR 0.82*                    | 0.66-1.03  | N/A                               | N/A            |
| BAS                                    | Mixed                                             | RCT: Watts, 1992                          | 1             | 53              | 170                         | RR 1.04*                    | 0.07-15.75 | N/A                               | N/A            |
| <b>Ezetimibe</b>                       |                                                   |                                           |               |                 |                             |                             |            |                                   |                |
| Ezetimibe                              | Mixed                                             | Zhan, 2018                                | 6             | 21145           | 52-312                      | RR 0.88                     | 0.81-0.95  | Fixed                             | 0%             |
| <b>Fibrates</b>                        |                                                   |                                           |               |                 |                             |                             |            |                                   |                |
| Fibrates                               | Mixed                                             | Keene, 2014                               | 18            | 45445           | 261                         | OR 0.80                     | 0.74-0.87  | Random                            | 1%             |
| <b>Niacin</b>                          |                                                   |                                           |               |                 |                             |                             |            |                                   |                |
| Niacin                                 | Mixed                                             | Garg, 2017                                | 9             | 34251           | NR                          | RR 0.85                     | 0.73-1.0   | Random                            | 29%            |
| Niacin                                 | Mixed                                             | Schandelmaier, 2017                       | 4             | 33164           | NR                          | RR 0.91                     | 0.77-1.07  | Random                            | 53%            |
| <b>Omega 3s</b>                        |                                                   |                                           |               |                 |                             |                             |            |                                   |                |
| Omega 3s                               | Mixed                                             | Aung, 2018                                | 9             | 59195           | NR                          | RR 0.98                     | 0.90-1.07  | NR                                | NR             |
| Omega 3s                               | Mixed                                             | Khan, 2021                                | 17            | 98549           | NR                          | RR 0.92                     | 0.85-1.00  | Random                            | NR             |
| <b>EPA Only</b>                        |                                                   |                                           |               |                 |                             |                             |            |                                   |                |
| EPA                                    | Mixed                                             | Khan, 2021                                | 3             | 27062           | NR                          | RR 0.72                     | 0.62-0.84  | Random                            | NR             |
| <b>PCSK9 Inhibitors</b>                |                                                   |                                           |               |                 |                             |                             |            |                                   |                |
| PCSK9 Inhibitors                       | Mixed                                             | Chaiyasothi, 2019                         | 12            | 83463           | NR                          | RR 0.81                     | 0.72-0.92  | Random                            | 28.4%          |
| PCSK9 Inhibitors                       | Mixed                                             | Dicembrini, 2019                          | 34            | 80449           | NR                          | OR 0.80                     | 0.73-0.89  | Random                            | 9%             |

|                                     |            |                     |    |       |         |          |           |        |       |
|-------------------------------------|------------|---------------------|----|-------|---------|----------|-----------|--------|-------|
| <b>PCSK9 Inhibitors</b>             | Mixed      | Du, 2019            | 41 | 90605 | 12-146  | RR 0.83  | 0.74-0.93 | Random | 12%   |
| <b>PCSK9 Inhibitors</b>             | Mixed      | Zhao, 2020          | 4  | 20405 | NR      | RR 0.86  | 0.78-0.96 | Fixed  | 0%    |
| <b>Statins</b>                      |            |                     |    |       |         |          |           |        |       |
| <b>Statins</b>                      | Primary    | Li, 2019            | 8  | 41191 | NR      | RR 0.60  | 0.51-0.69 | Fixed  | 14%   |
| <b>Statins</b>                      | Primary    | Yebyo, 2019         | 16 | NR    | NR      | RR 0.62  | 0.53-0.72 | Random | 31%   |
| <b>FATAL MYOCARDIAL INFARCTION</b>  |            |                     |    |       |         |          |           |        |       |
| <b>Bile acid sequestrants (BAS)</b> |            |                     |    |       |         |          |           |        |       |
| <b>BAS</b>                          | Mixed- MEN | RCT: Dorr, 1978     | 1  | 1094  | 52-157  | RR 0.06* | 0.00-1.01 | N/A    | N/A   |
| <b>Ezetimibe</b>                    |            |                     |    |       |         |          |           |        |       |
| <b>Ezetimibe</b>                    | NR         | NR                  | NR | NR    | NR      | NR       | NR        | NR     | NR    |
| <b>Fibrates</b>                     |            |                     |    |       |         |          |           |        |       |
| <b>Fibrates</b>                     | Mixed      | Keene, 2014         | 17 | 45422 | 261     | OR 0.92  | 0.81-1.04 | Random | 16%   |
| <b>Niacin</b>                       |            |                     |    |       |         |          |           |        |       |
| <b>Niacin</b>                       | Mixed      | Garg, 2017          | 4  | 33543 | NR      | RR 0.93  | 0.78-1.10 | Random | 55%   |
| <b>Niacin</b>                       | Mixed      | Jenkins, 2021       | 2  | 29087 | NR      | RR 1.04  | 0.90-1.21 | Random | 0%    |
| <b>Niacin</b>                       | Mixed      | Schandelmaier, 2017 | 6  | 33336 | NR      | RR 1.01  | 0.91-1.11 | Random | 0%    |
| <b>Omega-3s</b>                     |            |                     |    |       |         |          |           |        |       |
| <b>Omega-3s</b>                     | NR         | NR                  | NR | NR    | NR      | NR       | NR        | NR     | NR    |
| <b>EPA only</b>                     |            |                     |    |       |         |          |           |        |       |
| <b>EPA</b>                          | NR         | NR                  | NR | NR    | NR      | NR       | NR        | NR     | NR    |
| <b>Statins</b>                      |            |                     |    |       |         |          |           |        |       |
| <b>Statins</b>                      | Mixed      | Kim, 2020           | 8  | NR    | NR      | RR 0.73  | 0.57-0.93 | Random | 17.6% |
| <b>Statins</b>                      | Primary    | Li, 2019            | 3  | 10975 | NR      | RR 0.49  | 0.24-0.98 | Fixed  | 0%    |
| <b>Statins</b>                      | Primary    | Yebyo, 2019         | 6  | NR    | NR      | RR 0.72  | 0.50-1.03 | Random | 0%    |
| <b>MYOCARDIAL INFARCTION (ALL)</b>  |            |                     |    |       |         |          |           |        |       |
| <b>Ezetimibe</b>                    |            |                     |    |       |         |          |           |        |       |
| <b>Ezetimibe</b>                    | Mixed      | Toyota, 2019        | 3  | 20585 | NR      | OR 0.86  | 0.79-0.95 | Random | 0%    |
| <b>Fibrates</b>                     |            |                     |    |       |         |          |           |        |       |
| <b>Fibrates</b>                     | Primary    | Jakob, 2016         | 6  | 16135 | 104-261 | RR 0.79  | 0.68-0.92 | Fixed  | 24%   |

|                         |           |                     |    |        |        |         |           |        |       |
|-------------------------|-----------|---------------------|----|--------|--------|---------|-----------|--------|-------|
| <b>Fibrates</b>         | Secondary | Wang, 2015          | 10 | 13942  | 277    | RR 0.86 | 0.8-0.93  | Fixed  | 24%   |
| <b>Niacin</b>           |           |                     |    |        |        |         |           |        |       |
| <b>Niacin</b>           | Mixed     | D'Andrea, 2019      | 16 | 35642  | NR     | RR 0.87 | 0.74-1.02 | Random | 22%   |
| <b>Niacin</b>           | Mixed     | Jenkins, 2021       | 4  | 30196  | NR     | RR 0.96 | 0.85-1.08 | Random | 0%    |
| <b>Niacin</b>           | Mixed     | Riaz, 2019          | 6  | 37175  | NR     | RR 0.89 | 0.74-1.07 | Random | NR    |
| <b>Niacin</b>           | Mixed     | Schandelmaier, 2017 | 9  | 34829  | NR     | RR 0.93 | 0.87-1.00 | Random | 0%    |
| <b>Omega 3s</b>         |           |                     |    |        |        |         |           |        |       |
| <b>Omega 3s</b>         | Mixed     | Casula, 2020        | 12 | 53711  | NR     | OR 0.88 | 0.74-1.04 | NR     | NR    |
| <b>EPA only</b>         |           |                     |    |        |        |         |           |        |       |
| <b>EPA</b>              | NR        | NR                  | NR | NR     | NR     | NR      | NR        | NR     | NR    |
| <b>PCSK9 Inhibitors</b> |           |                     |    |        |        |         |           |        |       |
| <b>PCSK9 Inhibitors</b> | Mixed     | AlTurki, 2019       | 21 | NR     | NR     | OR 0.80 | 0.65-0.91 | Random | 20%   |
| <b>PCSK9 Inhibitors</b> | Mixed     | Bai, 2018           | 8  | 36691  | NR     | RR 0.73 | 0.65-0.82 | Fixed  | 3.9%  |
| <b>PCSK9 Inhibitors</b> | Mixed     | Casula, 2019        | 13 | 52899  | NR     | OR 0.78 | 0.72-0.84 | Random | NR    |
| <b>PCSK9 Inhibitors</b> | Mixed     | Cordero, 2020       | 6  | 81696  | NR     | RR 0.81 | 0.76-0.87 | NR     | 51.3% |
| <b>PCSK9 Inhibitors</b> | Mixed     | Dicembrini, 2019    | 34 | 36734  | NR     | OR 0.55 | 0.49-0.61 | Random | 0%    |
| <b>PCSK9 Inhibitors</b> | Mixed     | Ghadban, 2017       | 6  | 62776  | NR     | RR 0.78 | 0.63-0.97 | Random | 54%   |
| <b>PCSK9 Inhibitors</b> | Mixed     | Guedeney, 2019      | NR | 61784  | 8-208  | RR 0.80 | 0.74-0.86 | Random | 0%    |
| <b>PCSK9 Inhibitors</b> | Mixed     | Karatasakis, 2017   | 23 | 41932  | NR     | OR 0.72 | 0.64-0.81 | Random | 0%    |
| <b>PCSK9 Inhibitors</b> | Mixed     | Khan, 2022          | 5  | 80732  | 26-146 | RR 0.80 | 0.69-0.93 | Random | 0%    |
| <b>PCSK9 Inhibitors</b> | Mixed     | Khan, 2019          | 9  | 83318  | NR     | RR 0.83 | 0.71-0.98 | Random | NR    |
| <b>PCSK9 Inhibitors</b> | Mixed     | Ma, 2021            | 18 | 86020  | NR     | RR 0.81 | 0.76-0.87 | Fixed  | 23%   |
| <b>PCSK9 Inhibitors</b> | Mixed     | Mu, 2020            | 10 | NR     | NR     | RR 0.78 | 0.67-0.92 | Random | NR    |
| <b>PCSK9 Inhibitors</b> | Mixed     | Toyota, 2019        | 7  | 54677  | NR     | OR 0.77 | 0.66-0.88 | Random | 29%   |
| <b>PCSK9 Inhibitors</b> | Mixed     | Turgeon, 2018       | 19 | 59059  | NR     | RR 0.80 | 0.74-0.86 | Fixed  | 11%   |
| <b>PCSK9 Inhibitors</b> | Mixed     | Zhu, 2019           | 12 | 64368  | NR     | RR 0.78 | 0.71-0.86 | Random | 37.5% |
| <b>Statins</b>          |           |                     |    |        |        |         |           |        |       |
| <b>Statins</b>          | Mixed     | Byrne, 2022         | 18 | 121190 | NR     | RR 0.71 | 0.66-0.78 | Random | 36%   |

|                |         |             |    |       |         |         |           |        |     |
|----------------|---------|-------------|----|-------|---------|---------|-----------|--------|-----|
| <b>Statins</b> | Primary | Cai, 2021   | 22 | 95148 | 229     | OR 0.72 | 0.66-0.78 | Fixed  | 33% |
| <b>Statins</b> | Mixed   | Ponce, 2019 | 10 | 17856 | 226-346 | RR 0.66 | 0.56-0.78 | Random | 37% |
| <b>Statins</b> | Primary | Singh, 2020 | 6  | 50784 | NR      | RR 0.56 | 0.47-0.67 | Random | 0%  |

BAS: Bile Acid Sequestrants; \*Calculated by PEER team at [https://www.medcalc.org/calc/relative\\_risk.php](https://www.medcalc.org/calc/relative_risk.php); RCT: Randomized Controlled Trial; n: Total sample size in meta-analysis; OR: Odds Ratio; RR: Risk Ratio; CI: Confidence Interval; I<sup>2</sup>: indicates the level of heterogeneity; NR= Not Reported



**Table 5. Secondary Outcome: Stroke**

| Treatment               | Primary Prevention or Mixed (Primary + Secondary) | Systematic Review (Author, Year) | RCTs included | Sample Size (n) | Outcome Measure d at (weeks) | Point Estimate (OR, RR, HR) | 95% CI    | Random or fixed effects analysis? | I <sup>2</sup> |
|-------------------------|---------------------------------------------------|----------------------------------|---------------|-----------------|------------------------------|-----------------------------|-----------|-----------------------------------|----------------|
| <b>NON-FATAL STROKE</b> |                                                   |                                  |               |                 |                              |                             |           |                                   |                |
| <b>BAS</b>              |                                                   |                                  |               |                 |                              |                             |           |                                   |                |
| <b>BAS</b>              | NR                                                | NR                               | NR            | NR              | NR                           | NR                          | NR        | NR                                | NR             |
| <b>Ezetimibe</b>        |                                                   |                                  |               |                 |                              |                             |           |                                   |                |
| <b>Ezetimibe</b>        | Mixed                                             | Zhan, 2018                       | 6             | 21205           | 52-312                       | RR 0.83                     | 0.71-0.97 | Fixed                             | 0%             |
| <b>Fibrates</b>         |                                                   |                                  |               |                 |                              |                             |           |                                   |                |
| <b>Fibrates</b>         | NR                                                | NR                               | NR            | NR              | NR                           | NR                          | NR        | NR                                | NR             |
| <b>Niacin</b>           |                                                   |                                  |               |                 |                              |                             |           |                                   |                |
| <b>Niacin</b>           | NR                                                | NR                               | NR            | NR              | NR                           | NR                          | NR        | NR                                | NR             |
| <b>Omega 3s</b>         |                                                   |                                  |               |                 |                              |                             |           |                                   |                |
| <b>Omega 3s</b>         | Mixed                                             | Khan, 2021                       | 6             | 56987           | NR                           | RR 1.16                     | 1.00-1.34 | Random                            | NR             |
| <b>EPA only</b>         |                                                   |                                  |               |                 |                              |                             |           |                                   |                |
| <b>EPA</b>              | Mixed                                             | Khan, 2021                       | 2             | 8417            | NR                           | RR 0.71                     | 0.54-0.94 | Random                            | N/A            |
| <b>PCSK9 Inhibitors</b> |                                                   |                                  |               |                 |                              |                             |           |                                   |                |
| <b>PCSK9 Inhibitors</b> | Mixed                                             | Dicembrini, 2019                 | 33            | 80487           | NR                           | OR 0.73                     | 0.63-0.84 | Random                            | 0%             |
| <b>Statins</b>          |                                                   |                                  |               |                 |                              |                             |           |                                   |                |
| <b>Statins</b>          | Primary                                           | Taylor, 2013                     | 5             | 28097           | NR                           | RR 0.69                     | 0.58-0.83 | Fixed                             | 0%             |
| <b>Statins</b>          | Primary                                           | Yebyo, 2019                      | 16            | NR              | NR                           | RR 0.84                     | 0.76-0.92 | Random                            | 0%             |
| <b>FATAL STROKE</b>     |                                                   |                                  |               |                 |                              |                             |           |                                   |                |
| <b>BAS</b>              |                                                   |                                  |               |                 |                              |                             |           |                                   |                |
| <b>BAS</b>              | NR                                                | NR                               | NR            | NR              | NR                           | NR                          | NR        | NR                                | NR             |
| <b>Ezetimibe</b>        |                                                   |                                  |               |                 |                              |                             |           |                                   |                |

|                                     |           |                                           |    |       |     |         |            |        |       |
|-------------------------------------|-----------|-------------------------------------------|----|-------|-----|---------|------------|--------|-------|
| <b>Ezetimibe</b>                    | NR        | NR                                        | NR | NR    | NR  | NR      | NR         | NR     | NR    |
| <b>Fibrates</b>                     |           |                                           |    |       |     |         |            |        |       |
| <b>Fibrates</b>                     | NR        | NR                                        | NR | NR    | NR  | NR      | NR         | NR     | NR    |
| <b>Niacin</b>                       |           |                                           |    |       |     |         |            |        |       |
| <b>Niacin</b>                       | NR        | NR                                        | NR | NR    | NR  | NR      | NR         | NR     | NR    |
| <b>Omega 3s</b>                     |           |                                           |    |       |     |         |            |        |       |
| <b>Omega 3s</b>                     | NR        | NR                                        | NR | NR    | NR  | NR      | NR         | NR     | NR    |
| <b>EPA only</b>                     |           |                                           |    |       |     |         |            |        |       |
| <b>EPA</b>                          | NR        | NR                                        | NR | NR    | NR  | NR      | NR         | NR     | NR    |
| <b>PCSK9 Inhibitors</b>             |           |                                           |    |       |     |         |            |        |       |
| <b>PCSK9 Inhibitors</b>             | NR        | NR                                        | NR | NR    | NR  | NR      | NR         | NR     | NR    |
| <b>Statins</b>                      |           |                                           |    |       |     |         |            |        |       |
| <b>Statins</b>                      | Mixed     | Kim, 2020                                 | 12 | NR    | NR  | RR 1.11 | 0.87-1.41  | Random | 40.1% |
| <b>Statins</b>                      | Primary   | Taylor, 2013                              | 3  | 27238 | NR  | RR 0.63 | 0.18-2.23  | Random | 68%   |
| <b>Statins</b>                      | Primary   | Yebyo, 2019                               | 6  | NR    | NR  | RR 0.79 | 0.53-1.18  | Random | 0%    |
| <b>STROKE (ALL)</b>                 |           |                                           |    |       |     |         |            |        |       |
| <b>Bile acid sequestrants (BAS)</b> |           |                                           |    |       |     |         |            |        |       |
| <b>BAS</b>                          | Primary   | RCT: Lipid Research Clinics Program, 1984 | 1  | 3086  | 386 | RR 1.21 | 0.60-2.45  | NA     | NA    |
| <b>BAS</b>                          | Mixed     | RCT: Watts, 1992                          | 1  | 53    | 170 | RR 1.04 | 0.02-50.43 | NA     | NA    |
| <b>Ezetimibe</b>                    |           |                                           |    |       |     |         |            |        |       |
| <b>Ezetimibe</b>                    | Mixed     | Toyota, 2019                              | 3  | 20585 | NR  | OR 0.86 | 0.74-1.00  | Random | 0%    |
| <b>Fibrates</b>                     |           |                                           |    |       |     |         |            |        |       |
| <b>Fibrates</b>                     | Mixed     | Keene, 2014                               | 13 | 43188 | 261 | OR 1.01 | 0.90-1.13  | Random | 1%    |
| <b>Fibrates</b>                     | Secondary | Wang, 2015                                | 6  | 11719 | 282 | RR 1.03 | 0.91-1.16  | Fixed  | 11%   |
| <b>Niacin</b>                       |           |                                           |    |       |     |         |            |        |       |
| <b>Niacin</b>                       | Mixed     | D'Andrea, 2019                            | 11 | 34875 | NR  | OR 0.95 | 0.85-1.06  | Fixed  | 35%   |

|                         |       |                     |    |       |        |         |           |        |     |
|-------------------------|-------|---------------------|----|-------|--------|---------|-----------|--------|-----|
| <b>Niacin</b>           | Mixed | Garg, 2017          | 5  | 30428 | NR     | RR 0.89 | 0.72-1.10 | Random | 34% |
| <b>Niacin</b>           | Mixed | Jenkins, 2021       | 4  | 30196 | NR     | RR 1.01 | 0.90-1.14 | Random | 37% |
| <b>Niacin</b>           | Mixed | Riaz, 2019          | 5  | 34104 | NR     | RR 0.92 | 0.70-1.21 | Random | NR  |
| <b>Niacin</b>           | Mixed | Schandelmaier, 2017 | 7  | 33661 | NR     | RR 0.95 | 0.74-1.22 | Random | 42% |
| <b>Omega-3s</b>         |       |                     |    |       |        |         |           |        |     |
| <b>Omega-3s</b>         | NR    | NR                  | NR | NR    | NR     | NR      | NR        | NR     | NR  |
| <b>EPA only</b>         |       |                     |    |       |        |         |           |        |     |
| <b>EPA</b>              | NR    | NR                  | NR | NR    | NR     | NR      | NR        | NR     | NR  |
| <b>PCSK9 Inhibitors</b> |       |                     |    |       |        |         |           |        |     |
| <b>PCSK9 Inhibitors</b> | Mixed | AlTurki, 2019       | 12 | NR    | NR     | OR 0.75 | 0.65-0.85 | Random | 0%  |
| <b>PCSK9 Inhibitors</b> | Mixed | Bai, 2018           | 7  | 36476 | NR     | RR 0.81 | 0.68-0.96 | Fixed  | 0%  |
| <b>PCSK9 Inhibitors</b> | Mixed | Bajaj, 2018         | 11 | 37613 | NR     | RR 0.77 | 0.64-0.93 | Random | NR  |
| <b>PCSK9 Inhibitors</b> | Mixed | Casula, 2019        | 7  | 50792 | NR     | OR 0.77 | 0.67-0.89 | Random | NR  |
| <b>PCSK9 Inhibitors</b> | Mixed | Chaiyasothi, 2019   | 11 | 87605 | NR     | RR 0.74 | 0.65-0.85 | Random | 0%  |
| <b>PCSK9 Inhibitors</b> | Mixed | Cordero, 2020       | 6  | 80764 | NR     | RR 0.77 | 0.67-0.88 | NR     | 10% |
| <b>PCSK9 Inhibitors</b> | Mixed | Dicembrini, 2019    | 34 | 34793 | NR     | OR 0.80 | 0.67-0.96 | Random | 0%  |
| <b>PCSK9 Inhibitors</b> | Mixed | Du, 2019            | 35 | 94408 | 12-146 | RR 0.75 | 0.65-0.85 | Random | 0%  |
| <b>PCSK9 Inhibitors</b> | Mixed | Ghadban, 2017       | 6  | 62776 | NR     | RR 0.74 | 0.64-0.87 | Random | 0%  |
| <b>PCSK9 Inhibitors</b> | Mixed | Guedeney, 2019      | NR | 60328 | 8-208  | RR 0.78 | 0.67-0.89 | Random | 0%  |

|                         |         |                   |    |        |         |         |           |        |       |
|-------------------------|---------|-------------------|----|--------|---------|---------|-----------|--------|-------|
| <b>PCSK9 Inhibitors</b> | Mixed   | Karatasakis, 2017 | 23 | 42748  | NR      | OR 0.80 | 0.67-0.96 | Random | 0%    |
| <b>PCSK9 Inhibitors</b> | Mixed   | Khan, 2022        | 3  | 48829  | NR      | RR 0.75 | 0.64-0.88 | Random | NR    |
| <b>PCSK9 Inhibitors</b> | Mixed   | Khan, 2019        | 9  | 82417  | NR      | RR 0.75 | 0.66-0.86 | Random | NR    |
| <b>PCSK9 Inhibitors</b> | Mixed   | Ma, 2021          | 12 | 83406  | NR      | RR 0.75 | 0.66-0.86 | Fixed  | 0%    |
| <b>PCSK9 Inhibitors</b> | Mixed   | Mu, 2020          | 7  | NR     | NR      | RR 0.77 | 0.67-0.89 | Random | NR    |
| <b>PCSK9 Inhibitors</b> | Mixed   | Qin, 2021         | 6  | 55095  | NR      | RR 0.77 | 0.67-0.88 | Fixed  | 0%    |
| <b>PCSK9 Inhibitors</b> | Mixed   | Toyota, 2019      | 6  | 54461  | NR      | OR 0.77 | 0.67-0.89 | Random | 0%    |
| <b>PCSK9 Inhibitors</b> | Mixed   | Turgeon, 2018     | 17 | 57355  | NR      | RR 0.78 | 0.67-0.90 | Fixed  | 0%    |
| <b>PCSK9 Inhibitors</b> | Mixed   | Zhao, 2020        | 4  | 47001  | NR      | RR 0.75 | 0.64-0.87 | Fixed  | 0%    |
| <b>PCSK9 Inhibitors</b> | Mixed   | Zhu, 2019         | 9  | 63745  | NR      | RR 0.76 | 0.65-0.89 | Random | 0%    |
| <b>Statins</b>          |         |                   |    |        |         |         |           |        |       |
| <b>Statins</b>          | Mixed   | Byrne, 2022       | 18 | 131086 | NR      | RR 0.86 | 0.78-0.95 | Random | 49%   |
| <b>Statins</b>          | Primary | Cai, 2021         | 17 | 78473  | 244     | OR 0.80 | 0.72-0.89 | Fixed  | 20%   |
| <b>Statins</b>          | Mixed   | Milionis, 2020    | 4  | 35622  | 104-276 | RR 0.70 | 0.60-0.82 | Fixed  | 20%   |
| <b>Statins</b>          | Mixed   | Ponce, 2019       | 12 | 39918  | 168-288 | RR 0.80 | 0.70-0.91 | Random | 41.4% |
| <b>Statins</b>          | Primary | Singh, 2020       | 9  | 57754  | NR      | RR 0.78 | 0.63-0.96 | Random | 47%   |
| <b>Statins</b>          | Primary | Taylor, 2013      | 10 | 40295  | NR      | RR 0.78 | 0.68-0.89 | Fixed  | 26%   |

BAS: Bile Acid Sequestrants; \*Calculated by PEER team at [https://www.medcalc.org/calc/relative\\_risk.php](https://www.medcalc.org/calc/relative_risk.php); RCT: Randomized Controlled Trial; n: Total sample size in meta-analysis; OR: Odds Ratio; RR: Risk Ratio; CI: Confidence Interval; I<sup>2</sup>: indicates the level of heterogeneity; NR= Not Reported
