# Supplementary material
Source: PubMed Central journal article supplement (PMC10575662)
Supplement: Appendix_5_Subgroups_Analysis.pdf [file Appendix_5_Subgroups_Analysis.pdf]

Appendix 5: Subgroup Analyses

**Section 1. Results for Primary Cardiovascular Prevention**

**Table 1.1. Primary cardiovascular prevention: MACE**

| Treatment        | Systematic Review (Author, Year)           | MACE Definition                                                                                                                                                                    | RCTs included | Sample Size (n) | Outcome Measured at (weeks) | Point Estimate (OR, RR, HR) | 95% CI    | Random or fixed effects analysis? | I <sup>2</sup> |
|------------------|--------------------------------------------|------------------------------------------------------------------------------------------------------------------------------------------------------------------------------------|---------------|-----------------|-----------------------------|-----------------------------|-----------|-----------------------------------|----------------|
| <b>BAS</b>       | Lipid Research Clinics Program, 1984 (RCT) | “definite coronary heart disease death and/or nonfatal myocardial infarction”                                                                                                      | 1             | 3806            | 386                         | RR 0.83*                    | 0.67-1.01 | N/A                               | N/A            |
| <b>Ezetimibe</b> | Zhan, 2018                                 | “composite outcome of cardiovascular death, non-fatal myocardial infarction (MI), non-fatal stroke, hospitalisation for unstable angina, or coronary revascularisation procedures” | 1             | 720             | 104                         | RR 1.45                     | 0.56-3.77 | Fixed                             | N/A            |
| <b>Fibrates</b>  | Jakob, 2016                                | “Combined CVD death, non-fatal MI, non-fatal stroke”                                                                                                                               | 6             | 16135           | 104-261                     | RR 0.84                     | 0.74-0.96 | Fixed                             | 0%             |

|                         |                |                                                                                 |    |       |         |               |           |        |       |
|-------------------------|----------------|---------------------------------------------------------------------------------|----|-------|---------|---------------|-----------|--------|-------|
| <b>Niacin</b>           | NR             | NR                                                                              | NR | NR    | NR      | NR            | NR        | NR     | NR    |
| <b>Omega-3s</b>         | NR             | NR                                                                              | NR | NR    | NR      | NR            | NR        | NR     |       |
| <b>EPA only</b>         | NR             | NR                                                                              | NR | NR    | NR      | NR            | NR        | NR     | NR    |
| <b>PCSK9 Inhibitors</b> | Du, 2019       | “CV death, non-fatal MI, and non-fatal stroke”                                  | 8  | 7660  | 12-146  | RR 0.65       | 0.35-1.21 | Random | 0%    |
| <b>PCSK9 Inhibitors</b> | Turgeon, 2018  | Definitions from individual trials                                              | 1  | 103   | NR      | Not estimable |           |        |       |
| <b>Statins</b>          | Ponce, 2019    | “Coronary artery disease”                                                       | 5  | 12820 | 168-288 | RR 0.79       | 0.68-0.91 | Random | 0%    |
| <b>Statins</b>          | Li, 2019       | “Any coronary heart events” (angina, MI, coronary revascularization, CHD death) | 8  | 37395 | 52-276  | RR 0.73       | 0.68-0.78 | Fixed  | 0%    |
| <b>Statins</b>          | Sandwith, 2021 | “All CHD events” – 13 outcomes, see PDF (pg 3), excludes stroke                 | 13 | 88876 | NR      | RR 0.78       | 0.71-0.85 | Random | 71%   |
| <b>Statins</b>          | Singh, 2020    | Primary endpoint for each RCT (Appendix pg 21)                                  | 11 | 58504 | NR      | RR 0.71       | 0.62-0.82 | Random | 55%   |
| <b>Statins</b>          | Taylor, 2013   | “Fatal and non-fatal CVD”                                                       | 9  | 23805 | NR      | RR 0.75       | 0.70-0.81 | Fixed  | 31%   |
| <b>Statins</b>          | Yebyo, 2013    | “Non-fatal stroke, unstable angina, non-fatal MI and CV death”                  | 23 | NR    | NR      | RR 0.74       | 0.67-0.81 | Random | 49.5% |

BAS: Bile Acid Sequestrants; \*Calculated by PEER team at [https://www.medcalc.org/calc/relative\\_risk.php](https://www.medcalc.org/calc/relative_risk.php)

**Table 1.2. Primary cardiovascular prevention: Cardiovascular Mortality**

| Treatment               | Systematic Review (Author, Year)           | RCTs included | Sample Size (n) | Outcome Measured at (weeks) | Point Estimate (OR, RR, HR) | 95% CI    | Random or fixed effects analysis? | I <sup>2</sup> |
|-------------------------|--------------------------------------------|---------------|-----------------|-----------------------------|-----------------------------|-----------|-----------------------------------|----------------|
| <b>BAS</b>              | RCT: Lipids Research Clinics Program, 1984 | 1             | 3806            | 386                         | RR 0.79*                    | 0.49-1.26 | N/A                               | N/A            |
| <b>Ezetimibe</b>        | NR                                         | NR            | NR              | NR                          | NR                          | NR        | NR                                | NR             |
| <b>Fibrates</b>         | NR                                         | NR            | NR              | NR                          | NR                          | NR        | NR                                | NR             |
| <b>Niacin</b>           | NR                                         | NR            | NR              | NR                          | NR                          | NR        | NR                                | NR             |
| <b>Omega-3s</b>         | NR                                         | NR            | NR              | NR                          | NR                          | NR        | NR                                | NR             |
| <b>EPA</b>              | NR                                         | NR            | NR              | NR                          | NR                          | NR        | NR                                | NR             |
| <b>PCSK9 Inhibitors</b> | Du, 2019                                   | 23            | 10225           | 12-146                      | RR 0.63                     | 0.21-1.87 | Random                            | 0%             |
| <b>Statins</b>          | Kim, 2020                                  | 5             | 15076           | 120-260                     | RR 0.81                     | 0.66-1.01 | Random                            | 0%             |
| <b>Statins</b>          | Ponce, 2019                                | 6             | 16781           | 52-346                      | RR 1.01                     | 0.83-1.24 | Random                            | 0%             |
| <b>Statins</b>          | Cai, 2021                                  | 22            | 95959           | 230                         | OR 0.83                     | 0.76-0.91 | Fixed                             | 27%            |
| <b>Statins</b>          | Li, 2019                                   | 6             | 38935           | NR                          | RR 0.85                     | 0.74-0.99 | Fixed                             | 22%            |
| <b>Statins</b>          | Singh, 2020                                | 8             | 54515           | 99-291                      | RR 0.90                     | 0.78-1.04 | Random                            | 0%             |
| <b>Statins</b>          | Taylor, 2013                               | 5             | 34012           | NR                          | RR 0.83                     | 0.72-0.96 | Fixed                             | 0%             |
| <b>Statins</b>          | Yebyo, 2019                                | 15            | NR              | NR                          | RR 0.80                     | 0.71-0.91 | Random                            | 35.3%          |

BAS: Bile Acid Sequestrants; \*Calculated by PEER team at [https://www.medcalc.org/calc/relative\\_risk.php](https://www.medcalc.org/calc/relative_risk.php)

**Table 1.3. Primary cardiovascular prevention: All Cause Mortality**

| Treatment               | Systematic Review (Author, Year)           | RCTs included | Sample Size (n) | Outcome Measured at (weeks) | Point Estimate (OR, RR, HR) | 95% CI    | Random or fixed effects analysis? | I <sup>2</sup> |
|-------------------------|--------------------------------------------|---------------|-----------------|-----------------------------|-----------------------------|-----------|-----------------------------------|----------------|
| <b>BAS</b>              | RCT: Lipids Research Clinics Program, 1984 | 1             | 3806            | 386                         | RR 0.95*                    | 0.69-1.32 | N/A                               | N/A            |
| <b>Ezetimibe</b>        | Zhan, 2018                                 | 2             | 879             | 52-104                      | RR 0.78                     | 0.16-3.89 | Fixed                             | 35%            |
| <b>Fibrates</b>         | Jakob, 2016                                | 5             | 8471            | 52-261                      | RR 1.01                     | 0.81-1.26 | Fixed                             | 0%             |
| <b>Niacin</b>           | NR                                         | NR            | NR              | NR                          | NR                          | NR        | NR                                | NR             |
| <b>Omega-3s</b>         | NR                                         | NR            | NR              | NR                          | NR                          | NR        | NR                                | NR             |
| <b>EPA only</b>         | NR                                         | NR            | NR              | NR                          | NR                          | NR        | NR                                | NR             |
| <b>PCSK9 Inhibitors</b> | Du, 2019                                   | 23            | 10225           | 12-146                      | RR 0.42                     | 0.16-1.12 | Random                            | 0%             |
| <b>Statins</b>          | Byrne, 2022                                | 6             | 58056           | NR                          | RR 0.87                     | 0.78-0.97 | Random                            | 44%            |
| <b>Statins</b>          | Kim, 2020                                  | 6             | 17515           | 114-260                     | RR 0.92                     | 0.81-1.04 | Random                            | 21.8%          |
| <b>Statins</b>          | Ponce, 2019                                | 8             | 21681           | 52-346                      | RR 0.95                     | 0.84-1.07 | Random                            | 20.5%          |
| <b>Statins</b>          | Li, 2019                                   | 9             | 53656           | 52-276                      | RR 0.88                     | 0.76-1.01 | Random                            | 58%            |
| <b>Statins</b>          | Sandwith, 2021                             | 13            | 88876           | NR                          | RR 0.93                     | 0.89-0.97 | Fixed                             | 6%             |
| <b>Statins</b>          | Singh, 2020                                | 11            | 58504           | 99-291                      | RR 0.92                     | 0.83-1.02 | Random                            | 25%            |
| <b>Statins</b>          | Taylor, 2013                               | 13            | 48060           | 260                         | OR 0.86                     | 0.79-0.94 | Fixed                             | 0%             |
| <b>Statins</b>          | Yebyo, 2019                                | 24            | NR              | NR                          | RR 0.89                     | 0.85-0.93 | Random                            | 0%             |

BAS: Bile Acid Sequestrants; \*Calculated by PEER team at [https://www.medcalc.org/calc/relative\\_risk.php](https://www.medcalc.org/calc/relative_risk.php)



|                         |             |    |       |         |         |           |        |     |
|-------------------------|-------------|----|-------|---------|---------|-----------|--------|-----|
| <b>Fibrates</b>         | Jakob, 2016 | 6  | 16135 | 104-261 | RR 0.79 | 0.68-0.92 | Fixed  | 24% |
| <b>Niacin</b>           | NR          | NR | NR    | NR      | NR      | NR        | NR     | NR  |
| <b>Omega-3s</b>         | NR          | NR | NR    | NR      | NR      | NR        | NR     | NR  |
| <b>EPA only</b>         | NR          | NR | NR    | NR      | NR      | NR        | NR     | NR  |
| <b>PSCK9 inhibitors</b> | NR          | NR | NR    | NR      | NR      | NR        | NR     | NR  |
| <b>Statins</b>          | Byrne, 2022 | 6  | 54377 | NR      | RR 0.62 | 0.54-0.71 | Random | 0%  |
| <b>Statins</b>          | Ponce, 2019 | 3  | 8240  | 226-346 | RR 0.45 | 0.31-0.66 | Random | 0%  |
| <b>Statins</b>          | Cai, 2021   | 22 | 95148 | 229     | OR 0.72 | 0.66-0.78 | Fixed  | 33% |
| <b>Statins</b>          | Singh, 2020 | 6  | 50784 | NR      | RR 0.56 | 0.47-0.67 | Random | 0%  |

BAS: Bile Acid Sequestrants; \*Calculated by PEER team at [https://www.medcalc.org/calc/relative\\_risk.php](https://www.medcalc.org/calc/relative_risk.php)



|                         |              |    |       |         |         |           |        |       |
|-------------------------|--------------|----|-------|---------|---------|-----------|--------|-------|
| <b>Niacin</b>           | NR           | NR | NR    | NR      | NR      | NR        | NR     | NR    |
| <b>Omega-3s</b>         | NR           | NR | NR    | NR      | NR      | NR        | NR     | NR    |
| <b>EPA only</b>         | NR           | NR | NR    | NR      | NR      | NR        | NR     | NR    |
| <b>PCSK9 Inhibitors</b> | Du, 2019     | 9  | 8064  | 12-146  | RR 0.52 | 0.19-1.45 | Random | 0%    |
| <b>Statins</b>          | Byrne, 2022  | 6  | 58127 | NR      | RR 0.76 | 0.63-0.91 | Random | 41%   |
| <b>Statins</b>          | Ponce, 2019  | 6  | 18515 | 168-288 | RR 0.78 | 0.6-1.01  | Random | 58.1% |
| <b>Statins</b>          | Cai, 2021    | 17 | 78473 | 244     | OR 0.80 | 0.72-0.89 | Fixed  | 20%   |
| <b>Statins</b>          | Singh, 2020  | 9  | 57754 | NR      | RR 0.78 | 0.63-0.96 | Random | 47%   |
| <b>Statins</b>          | Taylor, 2013 | 10 | 40295 | NR      | RR 0.78 | 0.68-0.89 | Fixed  | 26%   |

BAS: Bile Acid Sequestrants; \*Calculated by PEER team at [https://www.medcalc.org/calc/relative\\_risk.php](https://www.medcalc.org/calc/relative_risk.php)



## Section 2. Results for secondary cardiovascular prevention

**Table 2.1. Secondary cardiovascular prevention: MACE**

| Treatment        | Systematic Review (Author, Year) | MACE Definition                                                                                                                                                                    | RCTs included | Sample Size (n) | Outcome Measured at (weeks) | Point Estimate (OR, RR, HR) | 95% CI    | Random or fixed effects analysis? | I <sup>2</sup> |
|------------------|----------------------------------|------------------------------------------------------------------------------------------------------------------------------------------------------------------------------------|---------------|-----------------|-----------------------------|-----------------------------|-----------|-----------------------------------|----------------|
| <b>BAS</b>       | RCT: Brensike, 1984              | “death, myocardial infarction, coronary artery disease progression or both MI and progression”                                                                                     | 1             | 143             | 261                         | OR 0.60                     | 0.30-1.21 | N/A                               | N/A            |
| <b>Ezetimibe</b> | Zhan, 2018                       | “composite outcome of cardiovascular death, non-fatal myocardial infarction (MI), non-fatal stroke, hospitalisation for unstable angina, or coronary revascularisation procedures” | 8             | 20745           | 52-312                      | RR 0.94                     | 0.90-0.98 | Fixed                             | 0%             |
| <b>Fibrates</b>  | Wang, 2015                       | “Composite outcome of non-fatal stroke, non-fatal MI and vascular death”                                                                                                           | 12            | 16064           | 271                         | RR 0.88                     | 0.81-0.97 | Random                            | 45%            |

|                         |                 |                                                                            |    |       |         |         |           |        |       |
|-------------------------|-----------------|----------------------------------------------------------------------------|----|-------|---------|---------|-----------|--------|-------|
| <b>Niacin</b>           | NR              | NR                                                                         | NR | NR    | NR      | NR      | NR        | NR     | NR    |
| <b>Omega-3s</b>         | NR              | NR                                                                         | NR | NR    | NR      | NR      | NR        | NR     | NR    |
| <b>EPA only</b>         | NR              | NR                                                                         | NR | NR    | NR      | NR      | NR        | NR     | NR    |
| <b>PCSK9 Inhibitors</b> | Du, 2019        | “CV death, non-fatal MI, and non-fatal stroke”                             | 10 | 78566 | 12-146  | RR 0.84 | 0.77-0.91 | Random | 25%   |
| <b>PCSK9 Inhibitors</b> | Lee, 2022       | “CV death, nonfatal MI, and nonfatal stroke or the nearest equivalent”     | 1  | 5337  | 110     | RR 0.89 | 0.74-1.07 | Fixed  | NA    |
| <b>PCSK9 Inhibitors</b> | Talasaz, 2021   | “CV death, MI, stroke”                                                     | 3  | 30738 | NR      | RR 0.80 | 0.73-0.87 | Random | 0%    |
| <b>PCSK9 Inhibitors</b> | Turgeon, 2018   | Definitions from individual trials                                         | 3  | 47458 | NR      | RR 0.84 | 0.79-0.89 | Fixed  | 0%    |
| <b>Statins</b>          | Koskinas, 2018  | “CV death, MI (or other ACS), coronary revascularization, stroke”          | 9  | 52874 | NR      | RR 0.77 | 0.71-0.83 | Random | 69%   |
| <b>Statins</b>          | Manktelow, 2009 | “Non-fatal stroke, non-fatal MI, vascular death”                           | 3  | 8403  | 120-260 | OR 0.74 | 0.67-0.82 | Fixed  | 49.7% |
| <b>Statins</b>          | Ponce, 2019     | “Coronary artery disease”                                                  | 6  | 11633 | 192-293 | RR 0.68 | 0.61-0.77 | Random | 33.2% |
| <b>Statins</b>          | Tramacere, 2019 | “Sudden death, fatal or non-fatal ACS, stroke, intracranial hemorrhage, or | 6  | 10192 | NR      | OR 0.75 | 0.69-0.83 | Random | 0%    |

|                |            |                                                          |   |      |    |         |           |        |    |
|----------------|------------|----------------------------------------------------------|---|------|----|---------|-----------|--------|----|
|                |            | pulmonary embolism”                                      |   |      |    |         |           |        |    |
| <b>Statins</b> | Vale, 2014 | “Non-fatal MI, non-fatal stroke, total number of deaths” | 6 | 2080 | 52 | RR 0.80 | 0.58-1.11 | Random | 0% |

MACE= Major Adverse Cardiac Events; RCT= Randomized controlled trial; OR= Odds Ratio; RR= Risk Ratio; NA=Not Applicable

**Table 2.2. Secondary cardiovascular prevention: Cardiovascular Mortality**

| Treatment               | Systematic Review (Author, Year) | RCTs included | Sample Size (n) | Outcome Measured at (weeks) | Point Estimate (OR, RR, HR) | 95% CI    | Random or fixed effects analysis? | I <sup>2</sup> |
|-------------------------|----------------------------------|---------------|-----------------|-----------------------------|-----------------------------|-----------|-----------------------------------|----------------|
| <b>BAS</b>              | NR                               | NR            | NR              | NR                          | NR                          | NR        | NR                                | NR             |
| <b>Ezetimibe</b>        | NR                               | NR            | NR              | NR                          | NR                          | NR        | NR                                | NR             |
| <b>Fibrates</b>         | Wang, 2015                       | 10            | 13653           | 282                         | RR 0.95                     | 0.86-1.05 | Fixed                             | 11%            |
| <b>Niacin</b>           | NR                               | NR            | NR              | NR                          | NR                          | NR        | NR                                | NR             |
| <b>Omega-3s</b>         | NR                               | NR            | NR              | NR                          | NR                          | NR        | NR                                | NR             |
| <b>EPA only</b>         | NR                               | NR            | NR              | NR                          | NR                          | NR        | NR                                | NR             |
| <b>PCSK9 Inhibitors</b> | Du, 2019                         | 14            | 79003           | 12-146                      | RR 0.95                     | 0.85-1.07 | Random                            | 0%             |
| <b>PCSK9 Inhibitors</b> | Guedeney, 2019                   | NR            | 51536           | 8-208                       | RR 0.76                     | 0.31-1.85 | Fixed                             | 0%             |
| <b>PCSK9 Inhibitors</b> | Lee, 2022                        | 1             | 5337            | 110                         | RR 1.11                     | 0.80-1.54 | Fixed                             | NA             |
| <b>PCSK9 Inhibitors</b> | Talasaz, 2021                    | 8             | 54002           | NR                          | RR 0.95                     | 0.82-1.09 | Random                            | 0%             |
| <b>Statins</b>          | Kim, 2020                        | 3             | 7994            | 52-234                      | RR 0.55                     | 0.20-1.45 | Random                            | 49.4%          |
| <b>Statins</b>          | Koskinas, 2018                   | 7             | 47115           | NR                          | RR 0.78                     | 0.73-0.84 | Random                            | 3%             |
| <b>Statins</b>          | Ponce, 2019                      | 4             | 5912            | 144-293                     | RR 0.68                     | 0.58-0.79 | Random                            | 0%             |
| <b>Statins</b>          | Vale, 2014                       | 5             | 1954            | 52                          | RR 0.55                     | 0.28-1.09 | Random                            | 0%             |

**Table 2.3. Secondary Prevention: All Cause Mortality**

| Treatment               | Systematic Review (Author, Year) | RCTs included | Sample Size (n) | Outcome Measured at (weeks) | Point Estimate (OR, RR, HR) | 95% CI    | Random or fixed effects analysis? | I <sup>2</sup> |
|-------------------------|----------------------------------|---------------|-----------------|-----------------------------|-----------------------------|-----------|-----------------------------------|----------------|
| <b>BAS</b>              | NR                               | NR            | NR              | NR                          | NR                          | NR        | NR                                | NR             |
| <b>Ezetimibe</b>        | Zhan, 2018                       | 6             | 20343           | 52-312                      | RR 0.98                     | 0.91-1.05 | Fixed                             | 7%             |
| <b>Fibrates</b>         | Wang, 2015                       | 10            | 13653           | 282                         | RR 0.98                     | 0.91-1.06 | Fixed                             | 23%            |
| <b>Niacin</b>           | NR                               | NR            | NR              | NR                          | NR                          | NR        | NR                                | NR             |
| <b>Omega-3s</b>         | NR                               | NR            | NR              | NR                          | NR                          | NR        | NR                                | NR             |
| <b>EPA only</b>         | NR                               | NR            | NR              | NR                          | NR                          | NR        | NR                                | NR             |
| <b>PCSK9 Inhibitors</b> | Du, 2019                         | 13            | 78033           | 12-146                      | RR 0.94                     | 0.81-1.08 | Random                            | 22%            |
| <b>PCSK9 Inhibitors</b> | Guedeney, 2019                   | NR            | 52504           | 8-208                       | RR 0.94                     | 0.85-1.03 | Fixed                             | 15.3%          |
| <b>PCSK9 Inhibitors</b> | Talasaz, 2021                    | 7             | 53034           | NR                          | RR 0.86                     | 0.62-1.19 | Random                            | 46%            |
| <b>Statins</b>          | Byrne, 2022                      | 5             | 24440           | NR                          | RR 0.86                     | 0.73-1.02 | Random                            | 82%            |
| <b>Statins</b>          | Fang, 2017                       | 2             | 239             | 12-52                       | OR 1.18                     | 0.60-2.35 | Fixed                             | 42%            |
| <b>Statins</b>          | Kim, 2020                        | 3             | 7993            | 52-234                      | RR 0.95                     | 0.88-1.03 | Random                            | 0%             |
| <b>Statins</b>          | Koskinas, 2018                   | 9             | 52874           | NR                          | RR 0.85                     | 0.78-0.92 | Random                            | 48%            |
| <b>Statins</b>          | Manktelow, 2009                  | 1             | 4731            | 255                         | OR 1.03                     | 0.84-1.25 | Fixed                             | NA             |
| <b>Statins</b>          | Ponce, 2019                      | 7             | 9300            | 108-384                     | RR 0.80                     | 0.73-0.89 | Random                            | 0%             |
| <b>Statins</b>          | Squizzato, 2011                  | 7             | 431             | 12-24                       | OR 1.51                     | 0.60-3.81 | Fixed                             | 0%             |
| <b>Statins</b>          | Tramacere, 2019                  | 5             | 6910            | Up to 260                   | OR 1.04                     | 0.87-1.25 | Random                            | 0%             |
| <b>Statins</b>          | Vale, 2014                       | 6             | 2080            | 52                          | RR 0.68                     | 0.39-1.20 | Random                            | 0%             |
| <b>Statins</b>          | Zhong, 2017                      | 31            | 57354           | NR                          | RR 0.88                     | 0.81-0.96 | NR                                | NR             |



|                         |                |    |       |         |         |           |        |       |
|-------------------------|----------------|----|-------|---------|---------|-----------|--------|-------|
| <b>PCSK9 Inhibitors</b> | Guedeney, 2019 | NR | 51174 | 8-208   | RR 0.80 | 0.74-0.86 | Fixed  | 33%   |
| <b>PCSK9 Inhibitors</b> | Lee, 2022      | 1  | 5337  | 110     | RR 0.74 | 0.55-0.99 | Fixed  | NA    |
| <b>PCSK9 Inhibitors</b> | Talasaz, 2021  | 8  | 54002 | NR      | RR 0.75 | 0.55-1.03 | Random | 50%   |
| <b>Statins</b>          | Byrne, 2022    | 5  | 26922 | NR      | RR 0.73 | 0.65-0.82 | Random | 4%    |
| <b>Statins</b>          | Ponce, 2019    | 6  | 7051  | 144-288 | RR 0.68 | 0.58-0.79 | Random | 0%    |
| <b>Statins</b>          | Vale, 2014     | 5  | 1954  | 52      | RR 0.94 | 0.61-1.45 | Random | 3.48% |

**Table 2.5. Secondary Prevention: Stroke**

| Treatment               | Systematic Review (Author, Year) | RCTs included | Sample Size (n) | Outcome Measured at (weeks) | Point Estimate (OR, RR, HR) | 95% CI    | Random or fixed effects analysis? | I <sup>2</sup> |
|-------------------------|----------------------------------|---------------|-----------------|-----------------------------|-----------------------------|-----------|-----------------------------------|----------------|
| <b>Non-fatal Stroke</b> |                                  |               |                 |                             |                             |           |                                   |                |
| BAS                     | NR                               | NR            | NR              | NR                          | NR                          | NR        | NR                                | NR             |
| Ezetimibe               | NR                               | NR            | NR              | NR                          | NR                          | NR        | NR                                | NR             |
| Fibrates                | NR                               | NR            | NR              | NR                          | NR                          | NR        | NR                                | NR             |
| Niacin                  | NR                               | NR            | NR              | NR                          | NR                          | NR        | NR                                | NR             |
| Omega-3s                | NR                               | NR            | NR              | NR                          | NR                          | NR        | NR                                | NR             |
| EPA only                | NR                               | NR            | NR              | NR                          | NR                          | NR        | NR                                | NR             |
| PCSK9 Inhibitors        | NR                               | NR            | NR              | NR                          | NR                          | NR        | NR                                | NR             |
| Statins                 | NR                               | NR            | NR              | NR                          | NR                          | NR        | NR                                | NR             |
| <b>Fatal Stroke</b>     |                                  |               |                 |                             |                             |           |                                   |                |
| BAS                     | NR                               | NR            | NR              | NR                          | NR                          | NR        | NR                                | NR             |
| Ezetimibe               | NR                               | NR            | NR              | NR                          | NR                          | NR        | NR                                | NR             |
| Fibrates                | NR                               | NR            | NR              | NR                          | NR                          | NR        | NR                                | NR             |
| Niacin                  | NR                               | NR            | NR              | NR                          | NR                          | NR        | NR                                | NR             |
| Omega-3s                | NR                               | NR            | NR              | NR                          | NR                          | NR        | NR                                | NR             |
| EPA only                | NR                               | NR            | NR              | NR                          | NR                          | NR        | NR                                | NR             |
| PCSK9 Inhibitors        | NR                               | NR            | NR              | NR                          | NR                          | NR        | NR                                | NR             |
| Statins                 | Kim, 2020                        | 2             | NR              | NR                          | RR 1.11                     | 0.70-1.78 | Random                            | 0%             |
| <b>Stroke (All)</b>     |                                  |               |                 |                             |                             |           |                                   |                |
| BAS                     | NR                               | NR            | NR              | NR                          | NR                          | NR        | NR                                | NR             |
| Ezetimibe               | NR                               | NR            | NR              | NR                          | NR                          | NR        | NR                                | NR             |
| Fibrates                | Wang, 2015                       | 6             | 11719           | 282                         | RR 1.03                     | 0.91-1.16 | Fixed                             | 11%            |
| Niacin                  | NR                               | NR            | NR              | NR                          | NR                          | NR        | NR                                | NR             |
| Omega-3s                | NR                               | NR            | NR              | NR                          | NR                          | NR        | NR                                | NR             |
| EPA only                | NR                               | NR            | NR              | NR                          | NR                          | NR        | NR                                | NR             |
| PCSK9 Inhibitors        | Du, 2019                         | 10            | 78566           | 12-146                      | RR 0.75                     | 0.66-0.86 | Random                            | 0%             |



|                         |                 |    |       |                  |         |           |        |       |
|-------------------------|-----------------|----|-------|------------------|---------|-----------|--------|-------|
| <b>PCSK9 Inhibitors</b> | Guedeney, 2019  | NR | 51271 | 8-208            | RR 0.77 | 0.67-0.89 | Fixed  | 0%    |
| <b>PCSK9 Inhibitors</b> | Lee, 2022       | 2  | 6281  | 110-146          | RR 0.90 | 0.71-1.15 | Fixed  | 0%    |
| <b>PCSK9 Inhibitors</b> | Sagris, 2021    | 2  | 46488 | NR               | HR 0.76 | 0.66-0.88 | NR     | 0%    |
| <b>PCSK9 Inhibitors</b> | Talasaz, 2021   | 8  | 54002 | NR               | RR 0.79 | 0.62-1.01 | Random | 5%    |
| <b>Statins</b>          | Byrne, 2022     | 4  | 22763 | NR               | RR 0.93 | 0.80-1.08 | Random | 57%   |
| <b>Statins</b>          | Fang, 2017      | 3  | 889   | 2-52             | OR 1.05 | 0.65-1.69 | Fixed  | 45%   |
| <b>Statins</b>          | Manktelow, 2009 | 5  | 9224  | 12-312           | OR 0.88 | 0.77-1.00 | Fixed  | 26.1% |
| <b>Statins</b>          | Ponce, 2019     | 6  | 10706 | 144-288          | RR 0.90 | 0.79-1.02 | Random | 0%    |
| <b>Statins</b>          | Tramacere, 2019 | 7  | 10398 | NR               | OR 0.90 | 0.80-1.02 | Random | 0%    |
| <b>Statins</b>          | Vale, 2014      | 4  | 1130  | 52               | RR 0.38 | 0.13-1.10 | Random | 0%    |
| <b>Statins</b>          | Yin, 2022       | 11 | 11749 | 5 days-260 weeks | OR 0.87 | 0.77-0.97 | Fixed  | 0%    |

### Section 3. Results for patients with diabetes mellitus

**Table 3.1. Diabetes mellitus: MACE**

| Treatment               | Systematic Review (Author, Year) | Primary Prevention or Mixed (Primary + Secondary) | MACE Definition                                                                    | RCTs included | Sample Size (n) | Outcome Measured at (weeks) | Point Estimate (OR, RR, HR) | 95% CI    | Random or fixed effects analysis ? | I <sup>2</sup> |
|-------------------------|----------------------------------|---------------------------------------------------|------------------------------------------------------------------------------------|---------------|-----------------|-----------------------------|-----------------------------|-----------|------------------------------------|----------------|
| <b>BAS</b>              | NR                               | NR                                                | NR                                                                                 | NR            | NR              | NR                          | NR                          | NR        | N/A                                | N/A            |
| <b>Ezetimibe</b>        | Hong, 2018                       | Mixed                                             | “Varied between studies, with coronary revascularization included in most studies” | 6             | 5195            | 48-288                      | RR 0.86                     | 0.78-0.94 | Random                             | 0%             |
| <b>Fibrates</b>         | Wang, 2015                       | Secondary                                         | “Composite outcome of non-fatal stroke, non-fatal MI and vascular death”           | 2             | 2643            | 245-261                     | RR 0.85                     | 0.73-0.99 | Fixed                              | 0%             |
| <b>Niacin</b>           | NR                               | NR                                                | NR                                                                                 | NR            | NR              | NR                          | NR                          | NR        |                                    |                |
| <b>Omega-3s</b>         | NR                               | NR                                                | NR                                                                                 | NR            | NR              | NR                          | NR                          | NR        |                                    |                |
| <b>EPA only</b>         | NR                               | NR                                                | NR                                                                                 | NR            | NR              | NR                          | NR                          | NR        |                                    |                |
| <b>PCSK9 Inhibitors</b> | Monami, 2019                     | Mixed                                             | “CV death, nonfatal MI, nonfatal stroke”                                           | 3             | 16700           | NR                          | OR 0.82                     | 0.74-0.91 | Random                             | 0%             |
| <b>Statins</b>          | Ponce, 2019                      | Primary                                           | “Coronary artery disease”                                                          | 1             | 1129            | 192                         | RR 0.67                     | 0.42-1.06 | Random                             | NA             |
| <b>Statins</b>          | Singh, 2020                      | Primary                                           | Primary endpoint for each RCT                                                      | 3             | NR              | NR                          | RR 0.45                     | 0.19-1.04 | Unclear                            | 56%            |

**Table 3.2. Diabetes mellitus: Cardiovascular Mortality**

| Treatment               | Primary Prevention or Mixed (Primary + Secondary) | Systematic Review (Author, Year) | RCTs included | Sample Size (n) | Outcome Measured at (weeks) | Point Estimate (OR, RR, HR) | 95% CI    | Random or fixed effects analysis? | I <sup>2</sup> |
|-------------------------|---------------------------------------------------|----------------------------------|---------------|-----------------|-----------------------------|-----------------------------|-----------|-----------------------------------|----------------|
| <b>BAS</b>              | NR                                                | NR                               | NR            | NR              | NR                          | NR                          | NR        | NR                                | NR             |
| <b>Ezetimibe</b>        | NR                                                | NR                               | NR            | NR              | NR                          | NR                          | NR        | NR                                | NR             |
| <b>Fibrates</b>         | NR                                                | NR                               | NR            | NR              | NR                          | NR                          | NR        | NR                                | NR             |
| <b>Niacin</b>           | NR                                                | NR                               | NR            | NR              | NR                          | NR                          | NR        | NR                                | NR             |
| <b>Omega-3s</b>         | NR                                                | NR                               | NR            | NR              | NR                          | NR                          | NR        | NR                                | NR             |
| <b>EPA only</b>         | NR                                                | NR                               | NR            | NR              | NR                          | NR                          | NR        | NR                                | NR             |
| <b>PCSK9 Inhibitors</b> | NR                                                | NR                               | NR            | NR              | NR                          | NR                          | NR        | NR                                | NR             |
| <b>Statins</b>          | Primary                                           | Ponce, 2019                      | 1             | 1129            | 192                         | RR 0.63                     | 0.3-1.33  | Random                            | NA             |
| <b>Statins</b>          | Primary                                           | Singh, 2020                      | 1             | NR              | NR                          | RR 0.65                     | 0.36-1.15 | Unclear                           | NA             |

**Table 3.3. Diabetes mellitus: All Cause Mortality**

| Treatment               | Primary Prevention or Mixed (Primary + Secondary) | Systematic Review (Author, Year) | RCTs included | Sample Size (n) | Outcome Measured at (weeks) | Point Estimate (OR, RR, HR) | 95% CI    | Random or fixed effects analysis? | I <sup>2</sup> |
|-------------------------|---------------------------------------------------|----------------------------------|---------------|-----------------|-----------------------------|-----------------------------|-----------|-----------------------------------|----------------|
| <b>BAS</b>              | NR                                                | NR                               | NR            | NR              | NR                          | NR                          | NR        | NR                                | NR             |
| <b>Ezetimibe</b>        | NR                                                | NR                               | NR            | NR              | NR                          | NR                          | NR        | NR                                | NR             |
| <b>Fibrates</b>         | NR                                                | NR                               | NR            | NR              | NR                          | NR                          | NR        | NR                                | NR             |
| <b>Niacin</b>           | NR                                                | NR                               | NR            | NR              | NR                          | NR                          | NR        | NR                                | NR             |
| <b>Omega-3s</b>         | NR                                                | NR                               | NR            | NR              | NR                          | NR                          | NR        | NR                                | NR             |
| <b>EPA only</b>         | NR                                                | NR                               | NR            | NR              | NR                          | NR                          | NR        | NR                                | NR             |
| <b>PCSK9 Inhibitors</b> | Mixed                                             | Monami, 2019                     | 2             | 739             | NR                          | OR 0.53                     | 0.08-3.67 | Random                            | 0%             |
| <b>Statins</b>          | Primary                                           | Ponce, 2019                      | 1             | 1129            | 192                         | RR 0.78                     | 0.51-1.18 | Random                            | NA             |
| <b>Statins</b>          | Primary                                           | Singh, 2020                      | 3             | NR              | NR                          | RR 0.70                     | 0.53-0.92 | Unclear                           | 0%             |



|                         |         |                |    |      |     |         |           |         |    |
|-------------------------|---------|----------------|----|------|-----|---------|-----------|---------|----|
| <b>PCSK9 Inhibitors</b> | NR      | NR             | NR | NR   | NR  | NR      | NR        | NR      | NR |
| <b>Statins</b>          | Primary | Ponce,<br>2019 | 1  | 1129 | 192 | RR 0.41 | 0.22-0.77 | Random  | NA |
| <b>Statins</b>          | Primary | Singh, 2020    | 1  | NR   | NR  | RR 0.53 | 0.35-0.81 | Unclear | NA |



|                         |         |                |    |      |     |         |           |         |    |
|-------------------------|---------|----------------|----|------|-----|---------|-----------|---------|----|
| <b>PCSK9 Inhibitors</b> | NR      | NR             | NR | NR   | NR  | NR      | NR        | NR      | NR |
| <b>Statins</b>          | Primary | Ponce,<br>2019 | 1  | 1129 | 192 | RR 0.53 | 0.27-1.03 | Random  | NA |
| <b>Statins</b>          | Primary | Singh, 2020    | 2  | NR   | NR  | RR 0.59 | 0.39-0.89 | Unclear | 0% |



## Section 4. Results for patients with chronic kidney disease

**Table 4.1. Chronic kidney disease: MACE**

| Treatment               | Systematic Review (Author, Year) | Primary Prevention or Mixed (Primary + Secondary) | MACE Definition                                  | RCTs included | Sample Size (n) | Outcome Measure d at (weeks) | Point Estimate (OR, RR, HR) | 95% CI    | Random or fixed effects analysis? | I <sup>2</sup> |
|-------------------------|----------------------------------|---------------------------------------------------|--------------------------------------------------|---------------|-----------------|------------------------------|-----------------------------|-----------|-----------------------------------|----------------|
| <b>BAS</b>              | NR                               | NR                                                | NR                                               | NR            | NR              | NR                           | NR                          | NR        | NR                                | NR             |
| <b>Ezetimibe</b>        | NR                               | NR                                                | NR                                               | NR            | NR              | NR                           | NR                          | NR        | NR                                | NR             |
| <b>Fibrates</b>         | NR                               | NR                                                | NR                                               | NR            | NR              | NR                           | NR                          | NR        | NR                                | NR             |
| <b>Niacin</b>           | NR                               | NR                                                | NR                                               | NR            | NR              | NR                           | NR                          | NR        | NR                                | NR             |
| <b>Omega-3s</b>         | NR                               | NR                                                | NR                                               | NR            | NR              | NR                           | NR                          | NR        | NR                                | NR             |
| <b>EPA only</b>         | NR                               | NR                                                | NR                                               | NR            | NR              | NR                           | NR                          | NR        | NR                                | NR             |
| <b>PCSK9 Inhibitors</b> | NR                               | NR                                                | NR                                               | NR            | NR              | NR                           | NR                          | NR        | NR                                | NR             |
| <b>Statins</b>          | Palmer, 2014                     | Mixed                                             | Unclear (could be different definitions in RCTs) | 13            | 36033           | NR                           | RR 0.72                     | 0.66-0.79 | Random                            | 40%            |

**Table 4.2. Chronic kidney disease: Cardiovascular Mortality**

| Treatment               | Primary Prevention or Mixed (Primary + Secondary) | Systematic Review (Author, Year) | RCTs included | Sample Size (n) | Outcome Measured at (weeks) | Point Estimate (OR, RR, HR) | 95% CI    | Random or fixed effects analysis? | I <sup>2</sup> |
|-------------------------|---------------------------------------------------|----------------------------------|---------------|-----------------|-----------------------------|-----------------------------|-----------|-----------------------------------|----------------|
| <b>BAS</b>              | NR                                                | NR                               | NR            | NR              | NR                          | NR                          | NR        | NR                                | NR             |
| <b>Ezetimibe</b>        | NR                                                | NR                               | NR            | NR              | NR                          | NR                          | NR        | NR                                | NR             |
| <b>Fibrates</b>         | NR                                                | NR                               | NR            | NR              | NR                          | NR                          | NR        | NR                                | NR             |
| <b>Niacin</b>           | NR                                                | NR                               | NR            | NR              | NR                          | NR                          | NR        | NR                                | NR             |
| <b>Omega-3s</b>         | NR                                                | NR                               | NR            | NR              | NR                          | NR                          | NR        | NR                                | NR             |
| <b>EPA only</b>         | NR                                                | NR                               | NR            | NR              | NR                          | NR                          | NR        | NR                                | NR             |
| <b>PCSK9 Inhibitors</b> | NR                                                | NR                               | NR            | NR              | NR                          | NR                          | NR        | NR                                | NR             |
| <b>Statins</b>          | Mixed                                             | Palmer, 2014                     | 7             | 19059           | NR                          | RR 0.77                     | 0.69-0.87 | Random                            | 0%             |



|                                    |       |                 |    |      |    |         |           |        |    |
|------------------------------------|-------|-----------------|----|------|----|---------|-----------|--------|----|
| <b>PCSK9 Inhibitors</b>            | NR    | NR              | NR | NR   | NR | NR      | NR        | NR     | NR |
| <b>Statins</b>                     | NR    | NR              | NR | NR   | NR | NR      | NR        | NR     | NR |
| <b>Myocardial Infarction (All)</b> |       |                 |    |      |    |         |           |        |    |
| <b>BAS</b>                         | NR    | NR              | NR | NR   | NR | NR      | NR        | NR     | NR |
| <b>Ezetimibe</b>                   | NR    | NR              | NR | NR   | NR | NR      | NR        | NR     | NR |
| <b>Fibrates</b>                    | NR    | NR              | NR | NR   | NR | NR      | NR        | NR     | NR |
| <b>Niacin</b>                      | NR    | NR              | NR | NR   | NR | NR      | NR        | NR     | NR |
| <b>Omega-3s</b>                    | NR    | NR              | NR | NR   | NR | NR      | NR        | NR     | NR |
| <b>EPA only</b>                    | NR    | NR              | NR | NR   | NR | NR      | NR        | NR     | NR |
| <b>PCSK9 Inhibitors</b>            | NR    | NR              | NR | NR   | NR | NR      | NR        | NR     | NR |
| <b>Statins</b>                     | Mixed | Palmer,<br>2014 | 8  | 9018 | NR | RR 0.55 | 0.42-0.72 | Random | 0% |



|                         |       |              |    |      |    |         |           |        |       |
|-------------------------|-------|--------------|----|------|----|---------|-----------|--------|-------|
| <b>PCSK9 Inhibitors</b> | NR    | NR           | NR | NR   | NR | NR      | NR        | NR     | NR    |
| <b>Statins</b>          | Mixed | Palmer, 2014 | 5  | 8658 | NR | RR 0.63 | 0.35-1.12 | Random | 53.2% |
