# Supplementary material
Source: PubMed Central journal article supplement (PMC10575662)
Supplement: Appendix_6_Adverse_Events.pdf [file Appendix_6_Adverse_Events.pdf]

## Appendix 6 – Adverse Events

**Table 1. Primary Adverse Events (Overall, Serious and Withdrawals due to Adverse Events)**

| Adverse Event                 | Intervention *         | Systematic Review (Author, Year) | RCTs included | Sample Size (n) | Outcome Measured at (weeks) | Intervention (%)      | Control (%)           | RR/OR/HR (95% CI)    |
|-------------------------------|------------------------|----------------------------------|---------------|-----------------|-----------------------------|-----------------------|-----------------------|----------------------|
| <b>Adverse Events-Overall</b> | Bile Acid Sequestrants | Hansen, 2017                     | 13            | 2714            | NR                          | NR                    | NR                    | RR 1.09 (1.02, 1.17) |
|                               | Ezetimibe              | NR                               | NR            | NR              | NR                          | NR                    | NR                    | NR                   |
|                               | Fibrates               | NR                               | NR            | NR              | NR                          | NR                    | NR                    | NR                   |
|                               | Niacin                 | NR                               | NR            | NR              | NR                          | NR                    | NR                    | NR                   |
|                               | Omega 3s (EPA+DHA)     | NR                               | NR            | NR              | NR                          | NR                    | NR                    | NR                   |
|                               | EPA only               | NR                               | NR            | NR              | NR                          | NR                    | NR                    | NR                   |
|                               | PCSK9 Inhibitors       | Bai, 2018                        | 10            | 37219           | NR                          | 15501/20258=7<br>6.5% | 12976/16961=7<br>6.5% | RR 1.01 (1.00-1.02)  |
|                               | PCSK9 Inhibitors       | Mu, 2020                         | 23            | NR              | NR                          | NR                    | NR                    | RR 1.00 (0.98-1.02)  |
|                               | PCSK9 Inhibitors       | Turgeon, 2018                    | 21            | 59536           | NR                          | 24026/31867=7<br>5.4% | 21057/27669=7<br>6.1% | RR 1.01 (0.98, 1.03) |
|                               | PCSK9 Inhibitors       | Wang, 2021                       | 13            | 24748           | NR                          | 9996/13212=75<br>.7%  | 8953/11536=77<br>.6%  | RR 0.99 (0.97-1.00)  |
|                               | PCSK9 Inhibitors       | Zhao, 2020                       | 8             | 49158           | NR                          | 18740/24805=7<br>5.5% | 18556/24353=7<br>6.2% | RR 0.99 (0.98-1.00)  |
|                               | Statins                | Taylor, 2013                     | 12            | 40716           | NR                          | 5748/20718=<br>27.7%  | 5090/19998=<br>25.4%  | RR 1.00 (0.97-1.03)  |
|                               | Statins                | Zhou, 2020                       | 6             | 3254            | 52-209                      | 581/1694=<br>34.3%    | 468/1560=<br>30%      | RR 0.99 (0.95, 1.04) |
| <b>Serious Adverse Events</b> | Bile Acid Sequestrants | Hansen, 2017                     | 9             | 2484            | NR                          | NR                    | NR                    | RR 1.56 (1.01-2.40)  |
|                               | Ezetimibe              | NR                               | NR            | NR              | NR                          | NR                    | NR                    | NR                   |

|                                              |                           |                                     |    |       |        |                      |                      |                      |
|----------------------------------------------|---------------------------|-------------------------------------|----|-------|--------|----------------------|----------------------|----------------------|
|                                              | Fibrates                  | NR                                  | NR | NR    | NR     | NR                   | NR                   | NR                   |
|                                              | Niacin                    | NR                                  | NR | NR    | NR     | NR                   | NR                   | NR                   |
|                                              | Omega 3s<br>(EPA+DHA)     | NR                                  | NR | NR    | NR     | NR                   | NR                   | NR                   |
|                                              | EPA only                  | NR                                  | NR | NR    | NR     | NR                   | NR                   | NR                   |
|                                              | PCSK9<br>Inhibitors       | Bai, 2018                           | 10 | 37219 | NR     | 4183/20258=20<br>.6% | 3802/16961=22<br>.4% | RR 1.00 (0.96-1.03)  |
|                                              | PCSK9<br>Inhibitors       | Casula, 2019                        | 28 | 62281 | NR     | 6568/33204=19<br>.8% | 6359/29077=21<br>.9% | OR 0.95 (0.91-0.99)  |
|                                              | PCSK9<br>Inhibitors       | Karatasakis,<br>2017                | 33 | 44278 | NR     | 4313/24211=17<br>.8% | 3901/20067=19<br>.4% | OR 0.99 (0.95-1.05)  |
|                                              | PCSK9<br>Inhibitors       | Mu, 2020                            | 22 | NR    | NR     | NR                   | NR                   | RR 0.98 (0.95-1.01)  |
|                                              | PCSK9<br>Inhibitors       | Talasz, 2021                        | 7  | 52965 | NR     | 6374/27048=23<br>.6% | 6351/25917=24<br>.5% | RR 0.97 (0.93-1.01)  |
|                                              | PCSK9<br>Inhibitors       | Turgeon, 2018                       | 21 | 59536 | NR     | 6562/31867=20<br>.6% | 6250/27669=22<br>.6% | RR 0.97 (0.95, 1.00) |
|                                              | PCSK9<br>Inhibitors       | Wang, 2021                          | 13 | 24773 | NR     | 2769/13225=20<br>.9% | 2662/11548=23<br>.1% | RR 0.94 (0.90-0.99)  |
|                                              | PCSK9<br>Inhibitors       | Zhao, 2020                          | 8  | 49188 | NR     | 5838/24816=23<br>.5% | 5948/24372=24<br>.4% | RR 0.97 (0.94-1.01)  |
|                                              | Statins                   | Singh, 2020                         | 5  | 42952 | NR     | 2615/21498=<br>12.2% | 2639/21454=<br>12.3% | RR 0.99 (0.95-1.04)  |
|                                              | Statins                   | Zhou, 2020                          | 7  | 15947 | 52-203 | 2238/7989=<br>28%    | 2270/7958=<br>28.5%  | RR 1.01 (0.97, 1.05) |
| <b>Withdrawals due to<br/>Adverse Events</b> | Bile Acid<br>Sequestrants | Hansen, 2017                        | 9  | 2501  | NR     | NR                   | NR                   | RR 1.48 (0.91-2.42)  |
|                                              | EPA                       | RCT: Bhatt,<br>2019 (REDUCE-<br>IT) | 1  | 8179  | 255    | 321/4089=7.9%        | 335/4090=8.2%        | P=0.60               |

|  |                    |                     |    |        |         |                  |                 |                      |
|--|--------------------|---------------------|----|--------|---------|------------------|-----------------|----------------------|
|  | Ezetimibe          | Zhan, 2018          | 10 | 21746  | NR      | 212/10943        | 219/10803       | RR 0.91 (0.75-1.09)  |
|  | Fibrates           | Jakob, 2016         | 3  | 4805   | 104-261 | 712/2420         | 622/2385        | RR 1.38 (0.71-2.68)  |
|  | Niacin             | Schandelmaier, 2017 | 17 | 33539  | 26-208  | 3083/17418       | 1470/16121      | RR 2.17 (1.70-2.77)  |
|  | Omega 3s (EPA+DHA) | NR                  | NR | NR     | NR      | NR               | NR              | NR                   |
|  | EPA only           | NR                  | NR | NR     | NR      | NR               | NR              | NR                   |
|  | PCSK9 Inhibitors   | Chaiyasothi, 2019   | 15 | 66623  | NR      | 982/34362        | 811/32260       | RR 1.08 (0.98-1.18)  |
|  | PCSK9 Inhibitors   | Guedeney, 2019      | NR | 60908  | NR      | 955/32379        | 771/28529       | RR 1.04 (0.95-1.15)  |
|  | PCSK9 Inhibitors   | Mu, 2020            | 20 | NR     | NR      | NR               | NR              | RR 0.99 (0.88-1.10)  |
|  | PCSK9 Inhibitors   | Turgeon, 2018       | 20 | 55289  | NR      | 916/29036        | 720/26253       | RR 1.06 (0.94, 1.21) |
|  | Statins            | Palmer, 2014        | 13 | 4219   | NR      | 266/2098=12.7%   | 258/2121=12.2%  | RR 1.16 (0.84-1.60)  |
|  | Statins            | Riaz, 2017          | 22 | 129680 | 213     | 8872/66024=13.4% | 8898/63656=14%  | OR 0.99 (0.93, 1.06) |
|  | Statins            | Singh, 2020         | 6  | 33846  | NR      | 1417/16896=8.4%  | 1521/16950=9.0% | RR 0.91 (0.69-1.18)  |
|  | Statins            | Taylor, 2013        | 9  | 21642  | NR      | 940/11054=8.5%   | 973/10588=9.2%  | OR 0.86 (0.65-1.12)  |
|  | Statins            | Yebyo, 2019         | 18 | NR     | NR      | NR               | NR              | RR 1.00 (0.83-1.20)  |
|  | Statins            | Zhou, 2020          | 8  | 7842   | 52-209  | 149/3961=3.8%    | 127/3881=3.3%   | RR 1.05 (0.83, 1.33) |

**Table 2. Other Noteworthy Adverse Events**

| <b>Intervention*</b>          | <b>Adverse Event</b>        | <b>Systematic Review (Author, Year)</b>   | <b>RCTs included</b> | <b>Sample Size (n)</b> | <b>Outcome Measured at (weeks)</b> | <b>Intervention (%)</b> | <b>Control (%)</b> | <b>RR/OR/HR (95% CI)</b> |
|-------------------------------|-----------------------------|-------------------------------------------|----------------------|------------------------|------------------------------------|-------------------------|--------------------|--------------------------|
| <b>Bile Acid Sequestrants</b> | Drug-related adverse events | Hansen, 2017                              | 13                   | 2655                   | NR                                 | NR                      | NR                 | RR 1.62 (1.20-2.19)      |
| <b>Bile Acid Sequestrants</b> | Constipation                | Hansen, 2017                              | NR                   | 1537                   | NR                                 | NR                      | NR                 | RR 3.13 (1.88-5.21)      |
| <b>Bile Acid Sequestrants</b> | Constipation-Year 1         | RCT: Lipid Research Clinics Program, 1984 | 1                    | 3806                   | 386                                | 39%                     | 10%                | NR                       |
| <b>Bile Acid Sequestrants</b> | Constipation-Year 7         | RCT: Lipid Research Clinics Program, 1984 | 1                    | 3806                   | 386                                | 8%                      | 4%                 | NR                       |
| <b>Bile Acid Sequestrants</b> | Constipation-Year 1         | RCT: Brensike, 1984                       | 1                    | 143                    | 261                                | 2%                      | 0%                 | NR                       |
| <b>Bile Acid Sequestrants</b> | Constipation-Year 5         | RCT: Brensike, 1984                       | 1                    | 143                    | 261                                | 5%                      | 4%                 | NR                       |
| <b>Bile Acid Sequestrants</b> | Abdominal Pain- Year 1      | RCT: Lipid Research Clinics Program, 1984 | 1                    | 3806                   | 386                                | 15%                     | 11%                | NR                       |
| <b>Bile Acid Sequestrants</b> | Abdominal Pain- Year 7      | RCT: Lipid Research Clinics Program, 1984 | 1                    | 3806                   | 386                                | 7%                      | 7%                 | NR                       |
| <b>Bile Acid Sequestrants</b> | Abdominal Pain- Year 1      | RCT: Brensike, 1984                       | 1                    | 143                    | 261                                | 2%                      | 0%                 | NR                       |
| <b>Bile Acid Sequestrants</b> | Abdominal Pain- Year 5      | RCT: Brensike, 1984                       | 1                    | 143                    | 261                                | 3%                      | 0%                 | NR                       |

|                               |                                  |                                                 |   |      |     |     |     |    |
|-------------------------------|----------------------------------|-------------------------------------------------|---|------|-----|-----|-----|----|
| <b>Bile Acid Sequestrants</b> | Belching/<br>Bloating- Year<br>1 | RCT: Lipid<br>Research Clinics<br>Program, 1984 | 1 | 3806 | 386 | 27% | 16% | NR |
| <b>Bile Acid Sequestrants</b> | Belching/<br>Bloating- Year<br>7 | RCT: Lipid<br>Research Clinics<br>Program, 1984 | 1 | 3806 | 386 | 9%  | 6%  | NR |
| <b>Bile Acid Sequestrants</b> | Belching/<br>Bloating- Year<br>1 | RCT: Brensike,<br>1984                          | 1 | 143  | 261 | 4%  | 1%  | NR |
| <b>Bile Acid Sequestrants</b> | Belching/<br>Bloating- Year<br>5 | RCT: Brensike,<br>1984                          | 1 | 143  | 261 | 5%  | 5%  | NR |
| <b>Bile Acid Sequestrants</b> | Diarrhea- Year<br>1              | RCT: Lipid<br>Research Clinics<br>Program, 1984 | 1 | 3806 | 386 | 10% | 11% | NR |
| <b>Bile Acid Sequestrants</b> | Diarrhea- Year<br>7              | RCT: Lipid<br>Research Clinics<br>Program, 1984 | 1 | 3806 | 386 | 4%  | 8%  | NR |
| <b>Bile Acid Sequestrants</b> | Gas- Year 1                      | RCT: Lipid<br>Research Clinics<br>Program, 1984 | 1 | 3806 | 386 | 32% | 26% | NR |
| <b>Bile Acid Sequestrants</b> | Gas- Year 7                      | RCT: Lipid<br>Research Clinics<br>Program, 1984 | 1 | 3806 | 386 | 12% | 12% | NR |
| <b>Bile Acid Sequestrants</b> | Gas- Year 1                      | RCT: Brensike,<br>1984                          | 1 | 143  | 261 | 7%  | 3%  | NR |
| <b>Bile Acid Sequestrants</b> | Gas- Year 5                      | RCT: Brensike,<br>1984                          | 1 | 143  | 261 | 5%  | 7%  | NR |

|                               |                                         |                                                 |   |      |     |     |     |    |
|-------------------------------|-----------------------------------------|-------------------------------------------------|---|------|-----|-----|-----|----|
| <b>Bile Acid Sequestrants</b> | Heartburn-<br>Year 1                    | RCT: Lipid<br>Research Clinics<br>Program, 1984 | 1 | 3806 | 386 | 27% | 10% | NR |
| <b>Bile Acid Sequestrants</b> | Heartburn-<br>Year 7                    | RCT: Lipid<br>Research Clinics<br>Program, 1984 | 1 | 3806 | 386 | 12% | 7%  | NR |
| <b>Bile Acid Sequestrants</b> | Heartburn-<br>Year 1                    | RCT: Brensike,<br>1984                          | 1 | 143  | 261 | 2%  | 0%  | NR |
| <b>Bile Acid Sequestrants</b> | Heartburn-<br>Year 5                    | RCT: Brensike,<br>1984                          | 1 | 143  | 261 | 5%  | 0%  | NR |
| <b>Bile Acid Sequestrants</b> | Nausea- Year 1                          | RCT: Lipid<br>Research Clinics<br>Program, 1984 | 1 | 3806 | 386 | 16% | 8%  | NR |
| <b>Bile Acid Sequestrants</b> | Nausea- Year 7                          | RCT: Lipid<br>Research Clinics<br>Program, 1984 | 1 | 3806 | 386 | 3%  | 4%  | NR |
| <b>Bile Acid Sequestrants</b> | Vomiting- Year<br>1                     | RCT: Lipid<br>Research Clinics<br>Program, 1984 | 1 | 3806 | 386 | 6%  | 5%  | NR |
| <b>Bile Acid Sequestrants</b> | Vomiting- Year<br>7                     | RCT: Lipid<br>Research Clinics<br>Program, 1984 | 1 | 3806 | 386 | 2%  | 3%  | NR |
| <b>Bile Acid Sequestrants</b> | At least 1 GI<br>Side Effect-<br>Year 1 | RCT: Lipid<br>Research Clinics<br>Program, 1984 | 1 | 3806 | 386 | 68% | 43% | NR |
| <b>Bile Acid Sequestrants</b> | At least 1 GI<br>Side Effect-<br>Year 7 | RCT: Lipid<br>Research Clinics<br>Program, 1984 | 1 | 3806 | 386 | 29% | 26% | NR |
| <b>Bile Acid Sequestrants</b> | Drowsiness-<br>Year 1                   | RCT: Brensike,<br>1984                          | 1 | 143  | 261 | 3%  | 0%  | NR |

|                               |                                                                                                       |                        |   |       |     |          |          |                         |
|-------------------------------|-------------------------------------------------------------------------------------------------------|------------------------|---|-------|-----|----------|----------|-------------------------|
| <b>Bile Acid Sequestrants</b> | Drowsiness-<br>Year 5                                                                                 | RCT: Brensike,<br>1984 | 1 | 143   | 261 | 9%       | 2%       | NR                      |
| <b>Bile Acid Sequestrants</b> | Itching- Year 1                                                                                       | RCT: Brensike,<br>1984 | 1 | 143   | 261 | 2%       | 1%       | NR                      |
| <b>Bile Acid Sequestrants</b> | Itching- Year 5                                                                                       | RCT: Brensike,<br>1984 | 1 | 143   | 261 | 2%       | 0%       | NR                      |
| <b>Bile Acid Sequestrants</b> | Leg Cramps-<br>Year 1                                                                                 | RCT: Brensike,<br>1984 | 1 | 143   | 261 | 6%       | 3%       | NR                      |
| <b>Bile Acid Sequestrants</b> | Leg Cramps-<br>Year 5                                                                                 | RCT: Brensike,<br>1984 | 1 | 143   | 261 | 9%       | 2%       | NR                      |
| <b>Bile Acid Sequestrants</b> | Nervousness-<br>Year 1                                                                                | RCT: Brensike,<br>1984 | 1 | 143   | 261 | 4%       | 1%       | NR                      |
| <b>Bile Acid Sequestrants</b> | Nervousness-<br>Year 5                                                                                | RCT: Brensike,<br>1984 | 1 | 143   | 261 | 9%       | 5%       | NR                      |
| <b>Bile Acid Sequestrants</b> | Rash- Year 1                                                                                          | RCT: Brensike,<br>1984 | 1 | 143   | 261 | 2%       | 0%       | NR                      |
| <b>Bile Acid Sequestrants</b> | Rash- Year 5                                                                                          | RCT: Brensike,<br>1984 | 1 | 143   | 261 | 2%       | 0%       | NR                      |
| <b>Bile Acid Sequestrants</b> | Weakness-<br>Year 1                                                                                   | RCT: Brensike,<br>1984 | 1 | 143   | 261 | 2%       | 0%       | NR                      |
| <b>Bile Acid Sequestrants</b> | Weakness-<br>Year 5                                                                                   | RCT: Brensike,<br>1984 | 1 | 143   | 261 | 5%       | 0%       | NR                      |
| <b>Ezetimibe</b>              | Myopathy,<br>creatine kinase<br>(CK) level $\geq 10$<br>xULN with<br>associated<br>muscle<br>symptoms | Zhan, 2018             | 3 | 20581 | NR  | 25/10287 | 19/10294 | RR 1.31 (0.72-<br>2.38) |

|                  |                                     |              |   |       |         |           |           |                       |
|------------------|-------------------------------------|--------------|---|-------|---------|-----------|-----------|-----------------------|
| <b>Ezetimibe</b> | Aminotransferase 3x upper limit     | Toyota, 2019 | 2 | 19865 | NR      | 252/9931  | 223/9934  | OR 1.31 (0.78-2.19)   |
| <b>Ezetimibe</b> | Hepatopathy                         | Zhan, 2018   | 4 | 20687 | NR      | 264/10342 | 232/10345 | RR 1.14 (0.96-1.35)   |
| <b>Ezetimibe</b> | Rhabdomyolysis                      | Toyota, 2019 | 1 | 12413 | NR      | 2/6199    | 1/6214    | OR 2.01 (0.18-22.12)  |
| <b>Ezetimibe</b> | Rhabdomyolysis                      | Zhan, 2018   | 2 | 19865 | NR      | 15/9931   | 19/9934   | RR 0.79 (0.40-1.55)   |
| <b>Ezetimibe</b> | Cancer                              | Zhan, 2018   | 5 | 20455 | NR      | 783/10218 | 777/10237 | RR 1.01 (0.92-1.11)   |
| <b>Ezetimibe</b> | Gallbladder-related Adverse Events  | Zhan, 2018   | 3 | 20024 | NR      | 293/10038 | 332/9986  | RR 0.88 (0.75-1.03)   |
| <b>Fibrates</b>  | Raised Serum Creatinine             | Jakob, 2016  | 3 | 4173  | 104-245 | 507/2099  | 267/2074  | RR 1.88 (1.65-2.15)   |
| <b>Fibrates</b>  | Development of Diabetic Retinopathy | Jakob, 2016  | 2 | 1308  | 104-245 | 49/660    | 56/648    | RR 0.6 (0.17-2.09)    |
| <b>Fibrates</b>  | Pancreatitis                        | Jakob, 2016  | 1 | 480   | 104     | 1/251     | 0/229     | RR 2.74 (0.11-66.88)  |
| <b>Fibrates</b>  | Venous Thrombotic Events            | Jakob, 2016  | 2 | 724   | 104     | 3/369     | 2/355     | RR 1.46 (0.24-8.78)   |
| <b>Fibrates</b>  | Gallbladder Disease                 | Jakob, 2016  | 3 | 4805  | 104-261 | 19/2420   | 14/2385   | RR 1.33 (0.68-2.62)   |
| <b>Fibrates</b>  | Myopathy                            | Wang, 2015   | 2 | 3138  | 52-624  | 7/1573    | 8/1565    | RR 0.86 (0.31-2.39)   |
| <b>Fibrates</b>  | Altered Liver Function Tests        | Wang, 2015   | 1 | 395   | 130     | 9/197     | 0/198     | RR 19.1 (1.12-325.86) |



|                 |                                                                |                     |    |       |         |                 |                |                        |
|-----------------|----------------------------------------------------------------|---------------------|----|-------|---------|-----------------|----------------|------------------------|
| <b>Fibrates</b> | GI Events                                                      | Wang, 2015          | 5  | 5593  | 130-313 | 1048/1941       | 2566/3652      | RR 1.29 (0.78-2.14)    |
| <b>Fibrates</b> | Raised Creatinine Concentration                                | Wang, 2015          | 1  | 1568  | 287     | 25/783          | 5/785          | RR 5.01 (1.93-13.03)   |
| <b>Niacin</b>   | New-onset diabetes or worsening glucose tolerance              | Garg, 2017          | 4  | 29330 | NR      | 1006/14675=6.9% | 712/14655=4.9% | RR 1.44 (1.31-1.59)    |
| <b>Niacin</b>   | New-onset Diabetes                                             | Schandelmaier, 2017 | 3  | 27982 | NR      | 529/14643       | 383/13339      | RR 1.32 (1.16, 1.51)   |
| <b>Niacin</b>   | Gastrointestinal (abdominal pain, nausea, dyspepsia, diarrhea) | Garg, 2017          | 6  | 33203 | NR      | 903/15800=5.7%  | 901/17403=5.2% | RR 1.53 (1.23-1.90)    |
| <b>Niacin</b>   | GI Symptoms                                                    | Schandelmaier, 2017 | 12 | 35353 | NR      | 1087/17150      | 1006/18203     | RR 1.69 (1.37-2.07)    |
| <b>Niacin</b>   | Musculoskeletal Events                                         | Garg, 2017          | 4  | 26646 | NR      | 484/13495=3.6%  | 388/13151=3.0% | RR 1.24 (1.09-1.42)    |
| <b>Niacin</b>   | Skin Flushing                                                  | Garg, 2017          | 7  | 33461 | NR      | 1454/15933=9.1% | 275/17528=1.6% | RR 18.59 (2.52-137.29) |
| <b>Niacin</b>   | Flushing                                                       | Schandelmaier, 2017 | 15 | 11038 | NR      | 1664/5146       | 223/5892       | RR 7.69 (4.14-14.28)   |
| <b>Niacin</b>   | Liver Toxicity                                                 | Garg, 2017          | 6  | 4842  | NR      | 14/2604=0.54%   | 6/2238=0.27%   | RR 1.66 (0.65-4.27)    |
| <b>Niacin</b>   | Pruritus                                                       | Schandelmaier, 2017 | 6  | 5800  | NR      | 649/2451        | 183/3349       | RR 5.26 (2.68-10.32)   |
| <b>Niacin</b>   | Rash                                                           | Schandelmaier, 2017 | 9  | 31485 | NR      | 424/15282       | 241/16203      | RR 3.16 (1.94-5.13)    |

|                           |                              |                     |    |       |     |           |           |                      |
|---------------------------|------------------------------|---------------------|----|-------|-----|-----------|-----------|----------------------|
| <b>Niacin</b>             | Headache                     | Schandelmaier, 2017 | 3  | 300   | NR  | 29/152    | 15/148    | RR 1.40 (0.86-2.28)  |
| <b>Omega 3s (EPA+DHA)</b> | Atrial Fibrillation          | Gencer, 2021        | 6  | 73031 | 255 | NR        | NR        | HR 1.23 (1.02-1.49)  |
| <b>Omega 3s (EPA+DHA)</b> | Atrial Fibrillation          | Khan, 2021          | 7  | 43157 | NR  | NR        | NR        | RR 1.14 (0.88-1.46)  |
| <b>Omega 3s (EPA+DHA)</b> | GI Adverse Events            | Khan, 2021          | 12 | NR    | NR  | NR        | NR        | RR 1.18 (0.89-1.56)  |
| <b>Omega 3s (EPA+DHA)</b> | Total Bleeding               | Khan, 2021          | 10 | NR    | NR  | NR        | NR        | RR 1.01 (0.97-1.05)  |
| <b>EPA only</b>           | Atrial Fibrillation          | Khan, 2021          | 1  | 8179  | NR  | NR        | NR        | RR 1.35 (1.10-1.66)  |
| <b>EPA only</b>           | GI Adverse Events            | Khan, 2021          | 3  | 27567 | NR  | NR        | NR        | RR 1.19 (0.75-1.89)  |
| <b>EPA only</b>           | Total Bleeding               | Khan, 2021          | 2  | 27324 | NR  | NR        | NR        | RR 1.49 (1.20-1.84)  |
| <b>PCSK-9 Inhibitors</b>  | Increased serum transaminase | Bai, 2018           | NR | 20271 | NR  | NR        | NR        | RR 0.98 (0.84-1.14)  |
| <b>PCSK-9 Inhibitors</b>  | Elevated Creatine Kinase     | Bai, 2018           | NR | 20237 | NR  | NR        | NR        | RR 0.85 (0.70-1.03)  |
| <b>PCSK-9 Inhibitors</b>  | Elevated Creatine Kinase     | Karatasakis, 2017   | 34 | 44691 | NR  | 279/24407 | 227/20284 | OR 0.84 (0.70-1.01)  |
| <b>PCSK-9 Inhibitors</b>  | Elevated Creatine Kinase     | Mu, 2020            | 20 | NR    | NR  | NR        | NR        | RR 0.87 (0.73, 1.03) |
| <b>PCSK-9 Inhibitors</b>  | Liver Enzyme Elevation       | Guedeney, 2019      | NR | 63807 | NR  | 565/34246 | 539/29561 | RR 0.94 (0.84-1.06)  |

|                          |                                                    |                   |    |       |    |           |           |                      |
|--------------------------|----------------------------------------------------|-------------------|----|-------|----|-----------|-----------|----------------------|
| <b>PCSK-9 Inhibitors</b> | Increase in alanine or aspartate amino transferase | Karatasakis, 2017 | 33 | 44473 | NR | 350/24262 | 310/20211 | OR 0.96 (0.82-1.12)  |
| <b>PCSK-9 Inhibitors</b> | Aminotransferase Elevation (3x the normal level)   | Toyota, 2019      | 4  | 53294 | NR | 511/27775 | 504/25519 | OR 0.95 (0.84, 1.08) |
| <b>PCSK-9 Inhibitors</b> | Neurological Events                                | Bai, 2018         | NR | 3034  | NR | NR        | NR        | RR 1.03 (0.82-1.30)  |
| <b>PCSK-9 Inhibitors</b> | Neurocognitive Disorders                           | Bai, 2018         | NR | 20599 | NR | NR        | NR        | RR 1.13 (0.95-1.34)  |
| <b>PCSK-9 Inhibitors</b> | Neurocognitive Deficits                            | Bajaj, 2018       | 16 | 39065 | NR | 280/21214 | 227/17851 | RR 1.11 (0.93-1.32)  |
| <b>PCSK-9 Inhibitors</b> | Neurocognitive Adverse Events                      | Guedeney, 2019    | NR | 62480 | NR | 436/33229 | 399/29251 | RR 1.01 (0.84-1.21)  |
| <b>PCSK-9 Inhibitors</b> | Neurocognitive adverse events                      | Karatasakis, 2017 | 21 | 42668 | NR | 287/23167 | 231/19501 | OR 1.12 (0.88-1.42)  |
| <b>PCSK-9 Inhibitors</b> | Neurocognitive Adverse Events                      | Khan, 2019        | 6  | 54910 | NR | 416/28709 | 386/26201 | RR 1.00 (0.85-1.18)  |
| <b>PCSK-9 Inhibitors</b> | Neurocognitive Adverse Events                      | Mu, 2020          | 11 | NR    | NR | NR        | NR        | RR 0.98 (0.85-1.13)  |
| <b>PCSK-9 Inhibitors</b> | Neurocognitive Impairment                          | Qin, 2021         | 5  | 54262 | NR | 459/28259 | 414/26003 | RR 1.02 (0.81-1.29)  |
| <b>PCSK-9 Inhibitors</b> | Neurocognitive Disorders                           | Talasaz, 2021     | 6  | 50759 | NR | 459/25940 | 420/24819 | RR 0.99 (0.86-1.13)  |

|                          |                                          |                   |    |       |     |                 |                |                      |
|--------------------------|------------------------------------------|-------------------|----|-------|-----|-----------------|----------------|----------------------|
| <b>PCSK-9 Inhibitors</b> | Neurocognitive Effects                   | Turgeon, 2018     | 18 | 59035 | NR  | 437/31430       | 397/27605      | RR 1.02 (0.89, 1.16) |
| <b>PCSK-9 Inhibitors</b> | Cognitive Adverse Events                 | Lee, 2022         | 1  | 5337  | 110 | 53/2686         | 53/2651        | RR 0.99 (0.68-1.44)  |
| <b>PCSK-9 Inhibitors</b> | New onset or worsening diabetes          | Bai, 2018         | NR | 17165 | NR  | NR              | NR             | RR 1.05 (0.96-1.16)  |
| <b>PCSK-9 Inhibitors</b> | New onset or worsening diabetes          | Karatasakis, 2017 | 15 | 27905 | NR  | 859/15281       | 749/12624      | OR 1.05 (0.95-1.17)  |
| <b>PCSK-9 Inhibitors</b> | Incident Diabetes Mellitus               | Khan, 2019        | 7  | 66030 | NR  | 1708/34296      | 1538/31734     | RR 1.00 (0.93-1.08)  |
| <b>PCSK-9 Inhibitors</b> | New-onset Diabetes Mellitus              | Lee, 2022         | 1  | 2968  | 110 | 114/1493        | 106/1475       | RR 1.06 (0.82, 1.37) |
| <b>PCSK-9 Inhibitors</b> | New-onset Diabetes Mellitus              | Monami, 2019      | 26 | 83835 | NR  | 1751/43447      | 1724/40388     | OR 1.00 (0.94-1.07)  |
| <b>PCSK-9 Inhibitors</b> | New-onset Diabetes Mellitus              | Mu, 2020          | 7  | NR    | NR  | NR              | NR             | RR 1.00 (0.93-1.07)  |
| <b>PCSK-9 Inhibitors</b> | New-onset Diabetes Mellitus              | Talasaz, 2021     | 5  | 33166 | NR  | 842/17093       | 742/16073      | RR 1.14 (0.81-1.60)  |
| <b>PCSK-9 Inhibitors</b> | New-onset or worsening diabetes mellitus | Turgeon, 2018     | 17 | 47701 | NR  | 2047/25651      | 2025/22050     | RR 0.96 (0.91, 1.02) |
| <b>PCSK-9 Inhibitors</b> | Injection Site Reactions                 | Guedeney, 2019    | NR | 61574 | NR  | 1141/32587=3.5% | 609/28987=2.1% | RR 1.41 (1.21-1.65)  |

|                          |                                    |                   |    |       |    |                |                |                      |
|--------------------------|------------------------------------|-------------------|----|-------|----|----------------|----------------|----------------------|
| <b>PCSK-9 Inhibitors</b> | Injection Site Reactions           | Mu, 2020          | 20 | NR    | NR | NR             | NR             | RR 1.54 (1.38-1.71)  |
| <b>PCSK-9 Inhibitors</b> | Injection Site Reactions           | Talasaz, 2021     | 8  | 53933 | NR | 830/27532=3.0% | 471/26401=1.8% | RR 2.11 (1.26-3.54)  |
| <b>PCSK-9 Inhibitors</b> | Injection Site Reactions           | Zhao, 2020        | 10 | 49536 | NR | 695/24998=2.8% | 439/24538=1.8% | RR 1.55 (1.38-1.75)  |
| <b>PCSK-9 Inhibitors</b> | Allergic Reactions                 | Guedeney, 2019    | NR | 52728 | NR | 1488/27207     | 1289/25521     | RR 1.04 (0.97-1.12)  |
| <b>PCSK-9 Inhibitors</b> | Myalgia                            | Karatasakis, 2017 | 23 | 14285 | NR | 400/9033       | 233/5252       | OR 0.95 (0.75-1.20)  |
| <b>PCSK-9 Inhibitors</b> | Myalgia                            | Mu, 2020          | 9  | NR    | NR | NR             | NR             | RR 1.09 (0.77-1.52)  |
| <b>PCSK-9 Inhibitors</b> | Myalgia                            | Talasaz, 2021     | 5  | 33166 | NR | 842/17093      | 742/16073      | RR 1.14 (0.81-1.60)  |
| <b>PCSK-9 Inhibitors</b> | Muscle-related events              | Turgeon, 2018     | 18 | 40867 | NR | 1463/22479     | 1058/18391     | RR 1.00 (0.87, 1.15) |
| <b>PCSK-9 Inhibitors</b> | Myalgia                            | Turgeon, 2018     | 15 | 8737  | NR | 297/5650       | 158/3087       | RR 1.05 (0.81, 1.36) |
| <b>PCSK-9 Inhibitors</b> | Rhabdomyolysis                     | Guedeney, 2019    | NR | 23526 | NR | 54/12242       | 54/11284       | RR 0.90 (0.62-1.31)  |
| <b>PCSK-9 Inhibitors</b> | Rhabdomyolysis                     | Toyota, 2019      | 1  | 27564 | NR | 8/13784        | 11/13780       | OR 0.73 (0.29, 1.81) |
| <b>PCSK-9 Inhibitors</b> | Cancer                             | Khan, 2019        | 3  | 3962  | NR | 49/2631        | 38/1331        | RR 0.54 (0.12-2.50)  |
| <b>PCSK-9 Inhibitors</b> | Upper Respiratory Tract Infections | Mu, 2020          | 14 | NR    | NR | NR             | NR             | RR 0.97 (0.78-1.21)  |
| <b>PCSK-9 Inhibitors</b> | Nasopharyngitis                    | Mu, 2020          | 13 | NR    | NR | NR             | NR             | RR 1.05 (0.87-1.27)  |

|                |                                                   |             |     |       |        |                      |                      |                         |
|----------------|---------------------------------------------------|-------------|-----|-------|--------|----------------------|----------------------|-------------------------|
| <b>Statins</b> | Muscle symptoms                                   | Cai, 2021   | 21  | 65304 | 224    | 3459/36026=<br>9.6%  | 2785/29278=<br>9.5%  | OR 1.06 (1.01-<br>1.13) |
| <b>Statins</b> | Any muscle problem (moderate dose vs placebo)     | Davis, 2021 | 16  | 94635 | NR     | 8110/47350=<br>17.1% | 8028/47285=<br>17.0% | RR 1.01 (0.98,<br>1.04) |
| <b>Statins</b> | Any muscle problem (high dose vs placebo)         | Davis, 2021 | 3   | 25466 | NR     | 1682/12738=<br>13.2% | 1633/12728=<br>12.8% | RR 1.03 (0.97,<br>1.10) |
| <b>Statins</b> | Statin associated muscle symptoms                 | Irwin, 2018 | 103 | NR    | 68     | NR                   | NR                   | RR 1.05 (1.01,<br>1.09) |
| <b>Statins</b> | Adverse muscle symptoms                           | Zhou, 2020  | 9   | 16633 | 52-209 | 642/8346=<br>7.7%    | 622/8287=<br>7.5%    | RR 1.01 (0.90,<br>1.12) |
| <b>Statins</b> | Myalgia or muscle pain (moderate dose vs placebo) | Davis, 2021 | 9   | 62214 | NR     | 276/31136=<br>0.9%   | 242/31078=<br>0.8%   | RR 1.13 (0.95,<br>1.34) |
| <b>Statins</b> | Myalgia or muscle pain (high dose vs placebo)     | Davis, 2021 | 3   | 25466 | NR     | 919/12738=<br>7.2%   | 818/12728=<br>6.4%   | RR 1.09 (0.94,<br>1.26) |
| <b>Statins</b> | Myalgia                                           | Li, 2019    | 2   | 22533 | NR     | 1550/11266=<br>13.8% | 1516/11267=<br>13.5% | RR 1.02 (0.96-<br>1.09) |
| <b>Statins</b> | Myalgia                                           | Singh, 2020 | 6   | 43134 | NR     | 2009/21601=<br>9.3%  | 1896/21533=<br>8.8%  | RR 1.02 (0.88-<br>1.19) |

|                |                                                            |              |    |       |        |                     |                     |                      |
|----------------|------------------------------------------------------------|--------------|----|-------|--------|---------------------|---------------------|----------------------|
| <b>Statins</b> | Myalgia or muscle pain                                     | Taylor, 2013 | 9  | 37938 | NR     | 1847/19396=<br>9.5% | 1704/18542=<br>9.2% | RR 1.03 (0.97-1.09)  |
| <b>Statins</b> | Attrition due to MSK complaints (moderate dose vs placebo) | Davis, 2021  | 8  | 62223 | NR     | 224/31148=<br>0.7%  | 198/31075=<br>0.6%  | RR 1.13 (0.93, 1.36) |
| <b>Statins</b> | Muscle disorders                                           | Cai, 2021    | 25 | 85740 | 218    | 70/46746=<br>0.1%   | 55/38994=<br>0.1%   | OR 0.88 (0.62,1.24)  |
| <b>Statins</b> | Myopathy                                                   | Li, 2019     | 2  | 22533 | NR     | 17/11266=<br>0.2%   | 16/11267=<br>0.1%   | RR 1.06 (0.54-2.10)  |
| <b>Statins</b> | Myopathy                                                   | Riaz, 2017   | 18 | NR    | NR     | NR                  | NR                  | OR 1.20 (0.88, 1.62) |
| <b>Statins</b> | Myopathy                                                   | Singh, 2020  | 3  | 33365 | NR     | 12/16690=<br>0.07%  | 11/16675=<br>0.07%  | RR 1.09 (0.48-2.47)  |
| <b>Statins</b> | Myopathy (CK >10X ULN)                                     | Vale, 2014   | 3  | 4677  | 13-52  | 9/2355=<br>0.4%     | 1/2322=<br>0.04%    | RR 4.69 (1.01-21.67) |
| <b>Statins</b> | Myopathy                                                   | Yebyo, 2019  | 16 | NR    | NR     | NR                  | NR                  | RR 1.08 (1.01-1.15)  |
| <b>Statins</b> | Myopathy                                                   | Zhou, 2020   | 7  | 13379 | NR     | 4/6724=<br>0.06%    | 3/6655=<br>0.05%    | NR                   |
| <b>Statins</b> | Liver dysfunction                                          | Cai, 2021    | 21 | 54803 | 198    | 406/31305=<br>1.3%  | 217/23498=<br>0.9%  | OR 1.33 (1.12, 1.58) |
| <b>Statins</b> | Hepatic disorder                                           | Li, 2019     | 2  | 18071 | NR     | 218/9035=<br>2.4%   | 186/9036=<br>2.1%   | RR 1.17 (0.96-1.42)  |
| <b>Statins</b> | Incidence of liver injury                                  | Liang, 2018  | 16 | 74078 | 12-317 | NR                  | NR                  | OR 1.18 (1.01, 1.39) |
| <b>Statins</b> | Hepatic dysfunction                                        | Yebyo, 2019  | 12 | NR    | NR     | NR                  | NR                  | RR 1.15 (1.01-1.31)  |

|                |                             |               |    |        |               |                 |                 |                      |
|----------------|-----------------------------|---------------|----|--------|---------------|-----------------|-----------------|----------------------|
| <b>Statins</b> | ALT/AST elevation           | Li, 2019      | 3  | 22802  | NR            | 82/11400=0.7%   | 32/11402=0.3%   | RR 2.36 (1.00-5.60)  |
| <b>Statins</b> | Elevated liver enzymes      | Palmer, 2014  | 7  | 7991   | NR            | 15/3969=0.4%    | 20/4022=0.5%    | RR 0.76 (0.39-1.50)  |
| <b>Statins</b> | AST/ALT elevation >2X ULN   | Singh, 2020   | 6  | 38146  | NR            | 256/19044=1.3%  | 215/19102=1.13% | RR 1.20 (1.00-1.43)  |
| <b>Statins</b> | Elevated liver enzymes      | Taylor, 2013  | 10 | 40094  | NR            | 476/20420=2.3%  | 472/19674=2.4%  | RR 1.16 (0.87-1.54)  |
| <b>Statins</b> | ALT >3X ULN                 | Vale, 2014    | 5  | 11914  | 4-203         | 76/5980=1.3%    | 24/5934=0.40%   | RR 2.49 (1.16-5.32)  |
| <b>Statins</b> | Hyper-transaminase mia      | Villani, 2019 | 73 | 123051 | 4-281         | 764/64227=1.2%  | 459/59113=0.8%  | OR 1.45 (1.24, 1.69) |
| <b>Statins</b> | Diabetes                    | Li, 2019      | 3  | 28376  | NR            | 425/14203=3.0%  | 350/14173=2.5%  | RR 1.21(1.05-1.39)   |
| <b>Statins</b> | Incidence Diabetes Mellitus | Singh, 2020   | 4  | 42804  | NR            | 746/21369=3.5%  | 680/21435=3.2%  | RR 1.10 (0.99-1.22)  |
| <b>Statins</b> | Diabetes type 2             | Yebyo, 2019   | 6  | NR     | NR            | NR              | NR              | RR 1.04 (0.91-1.19)  |
| <b>Statins</b> | Diabetes                    | Cai, 2021     | 9  | 58629  | 255           | 1190/29318=4.1% | 1161/29311=4.0% | OR 1.01 (0.88, 1.16) |
| <b>Statins</b> | Incident diabetes type 2    | Domecq, 2019  | 13 | NR     | 245 (104-406) | NR              | NR              | RR 1.10 (1.03, 1.18) |
| <b>Statins</b> | Incident diabetes type 2    | Engeda, 2019  | 8  | 78039  | 224           | NR              | NR              | RR 1.11 (1.00, 1.22) |



|                |                                                             |              |    |       |     |                  |                  |                      |
|----------------|-------------------------------------------------------------|--------------|----|-------|-----|------------------|------------------|----------------------|
| <b>Statins</b> | Incidence Diabetes Mellitus                                 | Khan, 2019   | 16 | 92003 | NR  | 2243/46039= 4.9% | 2052/45964= 4.5% | RR 1.09 (1.03-1.16)  |
| <b>Statins</b> | Incident diabetes type 2                                    | Taylor, 2013 | 2  | 24407 | NR  | 342/12205= 2.8%  | 290/12202= 2.4%  | OR 1.18 (1.01-1.39)  |
| <b>Statins</b> | Incident Diabetes Mellitus                                  | Wang, 2017   | 14 | 95102 | 208 | 2392/47504= 5.0% | 2167/47598= 4.6% | OR 1.11 (1.03, 1.20) |
| <b>Statins</b> | Renal insufficiency                                         | Cai, 2021    | 8  | 32001 | 208 | 597/16858= 3.5%  | 520/15143= 3.4%  | OR 1.14 (1.01, 1.28) |
| <b>Statins</b> | Renal disorder                                              | Li, 2019     | 3  | 28376 | NR  | 569/14203= 4.0%  | 508/14173= 3.6%  | RR 1.12 (1.00-1.26)  |
| <b>Statins</b> | Renal disorder                                              | Taylor, 2013 | 4  | 27804 | NR  | 563/14122= 4.0%  | 504/13682= 3.7%  | OR 1.11 (0.99-1.26)  |
| <b>Statins</b> | Renal disorder                                              | Yebyo, 2019  | 3  | NR    | NR  | NR               | NR               | RR 1.12 (1.00-1.26)  |
| <b>Statins</b> | Eye conditions (cataracts and other eye related conditions) | Cai, 2021    | 6  | 25328 | 198 | 321/15282= 2.1%  | 234/10046= 2.3%  | OR 1.23 (1.04, 1.47) |
| <b>Statins</b> | Rhabdomyolysis (moderate dose vs placebo)                   | Davis, 2021  | 14 | 76507 | NR  | 15/38280= 0.04%  | 9/38227= 0.02%   | RR 1.39 (0.68, 2.86) |
| <b>Statins</b> | Rhabdomyolysis (high dose vs placebo)                       | Davis, 2021  | 3  | 25535 | NR  | 3/12770= 0.02%   | 3/12765= 0.02%   | RR 0.96 (0.22, 4.09) |
| <b>Statins</b> | Rhabdomyolysis                                              | Li, 2019     | 2  | 22533 | NR  | 3/11266= 0.03%   | 3/11267= 0.03%   | RR 0.95 (0.20-4.54)  |

|                |                                       |                 |    |       |    |                  |                  |                       |
|----------------|---------------------------------------|-----------------|----|-------|----|------------------|------------------|-----------------------|
| <b>Statins</b> | Rhabdomyolysis (elevated CK)          | Palmer, 2014    | 7  | 4514  | NR | 3/2226= 0.1%     | 5/2288= 0.2%     | RR 0.84 (0.20-3.48)   |
| <b>Statins</b> | Rhabdomyolysis                        | Singh, 2020     | 3  | 37112 | NR | 3/18566= 0.02%   | 2/18546= 0.01%   | RR 1.29 (0.25-6.69)   |
| <b>Statins</b> | Rhabdomyolysis                        | Taylor, 2013    | 6  | 38468 | NR | 3/19410= 0.02%   | 3/19058= 0.02%   | RR 1.00 (0.23-4.38)   |
| <b>Statins</b> | Rhabdomyolysis                        | Vale, 2014      | 1  | 4497  | 17 | 3/2265= 0.1%     | 0/2232= 0.0%     | RR 6.9 (0.36-133.47)  |
| <b>Statins</b> | Rhabdomyolysis                        | Zhou, 2020      | 7  | 15308 | NR | 1/7691= 0.01%    | 0/7617= 0%       | NR                    |
| <b>Statins</b> | CK>10x ULN (moderate dose vs placebo) | Davis, 2021     | 11 | 61396 | NR | 46/30700= 0.1%   | 41/30696= 0.1%   | RR 1.17 (0.72, 1.90)  |
| <b>Statins</b> | CK>10x ULN (high dose vs placebo)     | Davis, 2021     | 2  | 7733  | NR | 2/3869= 0.05%    | 0/3869= 0%       | RR 2.73 (0.25, 30.11) |
| <b>Statins</b> | CK elevation                          | Li, 2019        | 2  | 5000  | NR | 3/2499= 0.1%     | 2/2501= 0.1%     | RR 1.31 (0.14-12.22)  |
| <b>Statins</b> | CK >10X ULN                           | Singh, 2020     | 4  | 17264 |    | 134/8583= 1.6%   | 130/8681= 1.5%   | RR 0.88 (0.51-1.53)   |
| <b>Statins</b> | Rhabdomyolysis, myalgia or rise in CK | Tramacere, 2019 | 3  | 6610  | NR | 4.6%             | 4.8%             | OR 0.95 (0.75-1.19)   |
| <b>Statins</b> | Gastrointestinal disorder             | Li, 2019        | 2  | 18071 | NR | 1756/9035= 19.4% | 1712/9036= 18.9% | RR 1.03 (0.97-1.09)   |
| <b>Statins</b> | Cancer                                | Li, 2019        | 6  | 41970 | NR | 918/20974= 4.4%  | 921/20996= 4.4%  | RR 0.99 (0.91-1.09)   |
| <b>Statins</b> | Cancer                                | Palmer, 2014    | 2  | 5581  | NR | 139/2781= 5.0%   | 136/2800= 4.9%   | RR 1.03 (0.82-1.30)   |

|                |                    |                 |    |       |                 |                     |                     |                         |
|----------------|--------------------|-----------------|----|-------|-----------------|---------------------|---------------------|-------------------------|
| <b>Statins</b> | Any cancer         | Singh, 2014     | 8  | 53830 | NR              | 1168/26931=<br>4.3% | 1204/26899=<br>4.5% | RR 0.97 (0.89-<br>1.05) |
| <b>Statins</b> | Cancer             | Taylor, 2013    | 11 | 38739 | NR              | 1180/19789=<br>6.0% | 1075/18950=<br>5.7% | RR 1.01 (0.93-<br>1.10) |
| <b>Statins</b> | All cancers        | Yebyo, 2019     | 9  | NR    | NR              | NR                  | NR                  | RR 1.01 (0.94-<br>1.09) |
| <b>Statins</b> | Fatal cancer       | Singh, 2014     | 4  | 39950 | NR              | 211/19994=<br>1.1%  | 236/19956=<br>1.2%  | RR 0.87 (0.61-<br>1.23) |
| <b>Statins</b> | Hemorrhagic stroke | Manktelow, 2009 | 2  | 8011  | 255-260         | 76/4010=<br>1.9%    | 44/4001=<br>1.1%    | OR 1.72 (1.20-<br>2.46) |
| <b>Statins</b> | Hemorrhagic stroke | Taylor, 2013    | 2  | 25634 | NR              | 22/12767=<br>0.2%   | 23/12867=<br>0.2%   | OR 0.97 (0.54-<br>1.75) |
| <b>Statins</b> | Hemorrhagic stroke | Tramacere, 2019 | 6  | 9976  | NR              | 1.8%                | 1.2%                | OR 1.54 (1.10-<br>2.15) |
| <b>Statins</b> | Hemorrhagic stroke | Yin, 2022       | 7  | 10255 | 5days-260 weeks | 100/5106=<br>2.0%   | 81/5119=<br>1.6%    | OR 1.15 (0.62-<br>2.13) |
| <b>Statins</b> | Headache or nausea | Yebyo, 2019     | 5  | NR    | NR              | NR                  | NR                  | RR 1.13 (0.97-<br>1.31) |
