# Supplementary material
Source: PubMed Central journal article supplement (PMC10575662)
Supplement: Appendix_7_GRADE_Tables.pdf [file Appendix_7_GRADE_Tables.pdf]

## GRADE Tables

### Bile Acid Sequestrants

| Outcome                 | No. of RCTs    | Risk of Bias                                                                                                                                                                                                                                                                            | Inconsistency                                                                                                      | Indirectness                                                                                 | Imprecision                                                                                                                                          | Publication Bias                                                       | No. of Patients (range) | Effect Estimate (range) | Median (IQR) | Certainty                                                                                       | Other Comments |
|-------------------------|----------------|-----------------------------------------------------------------------------------------------------------------------------------------------------------------------------------------------------------------------------------------------------------------------------------------|--------------------------------------------------------------------------------------------------------------------|----------------------------------------------------------------------------------------------|------------------------------------------------------------------------------------------------------------------------------------------------------|------------------------------------------------------------------------|-------------------------|-------------------------|--------------|-------------------------------------------------------------------------------------------------|----------------|
| <b>Overall Outcomes</b> |                |                                                                                                                                                                                                                                                                                         |                                                                                                                    |                                                                                              |                                                                                                                                                      |                                                                        |                         |                         |              |                                                                                                 |                |
| <b>MACE</b>             | 3              | Serious<br><br>Discrepancies exist in what is presented in the Lipids Research Clinic Trial. The effect estimate presented in the paper used a 90% confidence interval, however in the original publication on design (1979) stated the use of an alpha=0.01 (99% confidence interval). | Serious<br><br>All three RCTs have different effect sizes, ranging from 0.35-0.83 (none statistically significant) | Serious<br><br>All three definitions of MACE vary, including CAD progression in one outcome. | Serious<br><br>Confidence intervals are wide and contain both significant benefit as well as harm. Further, only 1/3 RCTs contribute >1000 patients. | Undetected<br><br>Only 1 small trial was industry-funded (Watts, 1992) | 53-3,806                | RR 0.35-0.83            | N/A          | Very low<br><br>This outcome had four serious (-4) therefore <b>downgrade by 4 to very low.</b> |                |
| <b>CV Mortality</b>     | 2 (3 outcomes) | Serious<br><br>Discrepancies exist in what is presented in the Lipids Research Clinic Trial. The effect estimate                                                                                                                                                                        | Serious<br><br>The effect estimates ranges from significant benefit to harm.                                       | Serious<br><br>The population is mainly in European men (largest trial).                     | Serious<br><br>Confidence intervals are wide, including both important harms and                                                                     | Undetected                                                             | 2,278-3,806             | RR 0.46-1.08            |              | Very low<br><br>This outcome had four serious (-4) therefore <b>downgrade</b>                   |                |

| Outcome                    | No. of RCTs    | Risk of Bias                                                                                                                                                                                                                                                                                   | Inconsistency                                                                                         | Indirectness                                                                   | Imprecision                                                                                                                                | Publication Bias | No. of Patients (range) | Effect Estimate (range) | Median (IQR) | Certainty                                                                                              | Other Comments |
|----------------------------|----------------|------------------------------------------------------------------------------------------------------------------------------------------------------------------------------------------------------------------------------------------------------------------------------------------------|-------------------------------------------------------------------------------------------------------|--------------------------------------------------------------------------------|--------------------------------------------------------------------------------------------------------------------------------------------|------------------|-------------------------|-------------------------|--------------|--------------------------------------------------------------------------------------------------------|----------------|
|                            |                | presented in the paper used a 90% confidence interval, however in the original publication on design (1979) stated the use of an alpha=0.01 (99% confidence interval).                                                                                                                         |                                                                                                       |                                                                                | benefits, despite large sample sizes in 2/3 trials.                                                                                        |                  |                         |                         |              | by 4 to very low.                                                                                      |                |
| <b>All-Cause Mortality</b> | 3 (4 outcomes) | <p>Serious</p> <p>Discrepancies exist in what is presented in the Lipids Research Clinic Trial. The effect estimate presented in the paper used a 90% confidence interval, however in the original publication on design (1979) stated the use of an alpha=0.01 (99% confidence interval).</p> | <p>Serious</p> <p>The effect estimates varied greatly, with none being statistically significant.</p> | <p>Serious</p> <p>The population is mainly in European men (largest trial)</p> | <p>Serious</p> <p>Confidence intervals are wide, including both important harms and benefits, despite large sample sizes in 2/3 trials</p> | Undetected       | 53-3,806                | RR 0.35-0.95            | N/A          | <p>Very low</p> <p>This outcome had four serious (-4) therefore <b>downgrade by 4 to very low.</b></p> |                |

| Outcome               | No. of RCTs | Risk of Bias                                                                                                                                                                                                                                                                            | Inconsistency                                                         | Indirectness             | Imprecision                                                                                | Publication Bias | No. of Patients (range) | Effect Estimate (range)     | Median (IQR) | Certainty                                                                                                                | Other Comments |
|-----------------------|-------------|-----------------------------------------------------------------------------------------------------------------------------------------------------------------------------------------------------------------------------------------------------------------------------------------|-----------------------------------------------------------------------|--------------------------|--------------------------------------------------------------------------------------------|------------------|-------------------------|-----------------------------|--------------|--------------------------------------------------------------------------------------------------------------------------|----------------|
| <b>MI (Non-Fatal)</b> | 2           | Serious<br><br>Discrepancies exist in what is presented in the Lipids Research Clinic Trial. The effect estimate presented in the paper used a 90% confidence interval, however in the original publication on design (1979) stated the use of an alpha=0.01 (99% confidence interval). | Serious<br><br>One effect estimate shows benefit, and one shows harm. | Serious<br><br>100% men  | Serious<br><br>Confidence intervals are wide, including both important harms and benefits. | Undetected       | 53-3,806                | RR 0.82-1.04                | N/A          | Very low<br><br>This outcome had four serious (-4) therefore <b>downgrade by 4 to very low.</b>                          |                |
| <b>MI (Fatal)</b>     | 1           | Not serious                                                                                                                                                                                                                                                                             | Not serious                                                           | Serious<br><br>100% men. | Very serious<br><br>Very few events and large confidence intervals.                        | Undetected       | 1,094                   | RR 0.06 (95% CI 0.00, 1.01) | N/A          | Very low<br><br>This outcome had one serious (-1) and one very serious (-2) therefore <b>downgrade by 3 to very low.</b> |                |
| <b>Stroke (All)</b>   | 2           | Serious                                                                                                                                                                                                                                                                                 | Not serious                                                           | Serious                  | Very serious                                                                               | Undetected       | 53-3,806                | RR 1.04-1.21                | RR 1.13      | Very low                                                                                                                 |                |

| Outcome                   | No. of RCTs | Risk of Bias                                                                                                                                                                                                                                                             | Inconsistency | Indirectness                                                                                                             | Imprecision                                                                                       | Publication Bias | No. of Patients (range) | Effect Estimate (range)    | Median (IQR) | Certainty                                                                                                | Other Comments |
|---------------------------|-------------|--------------------------------------------------------------------------------------------------------------------------------------------------------------------------------------------------------------------------------------------------------------------------|---------------|--------------------------------------------------------------------------------------------------------------------------|---------------------------------------------------------------------------------------------------|------------------|-------------------------|----------------------------|--------------|----------------------------------------------------------------------------------------------------------|----------------|
|                           |             | Discrepancies exist in what is presented in the Lipids Research Clinic Trial. The effect estimate presented in the paper used a 90% confidence interval, however in the original publication on design (1979) stated the use of an alpha=0.01 (99% confidence interval). |               | 100% men.                                                                                                                | Very large confidence intervals, containing both benefit and harms, including the largest trial.  |                  |                         |                            |              | This outcome had two serious (-2) and one very serious (-2) therefore <b>downgrade by 4 to very low.</b> |                |
| <b>Primary Prevention</b> |             |                                                                                                                                                                                                                                                                          |               |                                                                                                                          |                                                                                                   |                  |                         |                            |              |                                                                                                          |                |
| <b>MACE</b>               | 1           | Serious<br><br>Discrepancies exist in what is presented. The effect estimate presented in the paper used a 90% confidence interval, however in the original publication on design (1979) stated the use                                                                  | Not serious   | Serious<br><br>100% male population, majority European (96%). MACE definition is not congruent with traditional 3-point. | Serious<br><br>Summary confidence intervals contains both important benefits and potential harms. | Undetected       | 3,806                   | RR 0.83 (95% CI 0.67-1.01) | N/A          | Very low<br><br>This outcome had three serious (-3) therefore <b>downgrade by 3 to very low.</b>         |                |

| Outcome                    | No. of RCTs | Risk of Bias                                                                                                                                                                                                                                        | Inconsistency | Indirectness                                                  | Imprecision                                                                                       | Publication Bias | No. of Patients (range) | Effect Estimate (range)    | Median (IQR) | Certainty                                                                                        | Other Comments |
|----------------------------|-------------|-----------------------------------------------------------------------------------------------------------------------------------------------------------------------------------------------------------------------------------------------------|---------------|---------------------------------------------------------------|---------------------------------------------------------------------------------------------------|------------------|-------------------------|----------------------------|--------------|--------------------------------------------------------------------------------------------------|----------------|
|                            |             | of an alpha=0.01 (99% confidence interval).                                                                                                                                                                                                         |               |                                                               |                                                                                                   |                  |                         |                            |              |                                                                                                  |                |
| <b>CV Mortality</b>        | 1           | Serious<br><br>Discrepancies exist in what is presented. The effect estimate presented in the paper used a 90% confidence interval, however in the original publication on design (1979) stated the use of an alpha=0.01 (99% confidence interval). | Not serious   | Serious<br><br>100% male population, majority European (96%). | Serious<br><br>Summary confidence intervals contains both important benefits and potential harms. | Undetected       | 3,806                   | RR 0.79 (95% CI 0.49-1.26) | N/A          | Very low<br><br>This outcome had three serious (-3) therefore <b>downgrade by 3 to very low.</b> |                |
| <b>All-Cause Mortality</b> | 1           | Serious<br><br>Discrepancies exist in what is presented. The effect estimate presented in the paper used a 90% confidence interval,                                                                                                                 | Not serious   | Serious<br><br>100% male population, majority European (96%). | Serious<br><br>Summary confidence intervals contains both important benefits and potential harms. | Undetected       | 3,806                   | RR 0.95 (95% CI 0.69-1.32) | N/A          | Very low<br><br>This outcome had three serious (-3) therefore <b>downgrade by 3 to very low.</b> |                |

| Outcome               | No. of RCTs | Risk of Bias                                                                                                                                                                                                                                        | Inconsistency | Indirectness                                                  | Imprecision                                                                                       | Publication Bias | No. of Patients (range) | Effect Estimate (range)    | Median (IQR) | Certainty                                                                                        | Other Comments |
|-----------------------|-------------|-----------------------------------------------------------------------------------------------------------------------------------------------------------------------------------------------------------------------------------------------------|---------------|---------------------------------------------------------------|---------------------------------------------------------------------------------------------------|------------------|-------------------------|----------------------------|--------------|--------------------------------------------------------------------------------------------------|----------------|
|                       |             | however in the original publication on design (1979) stated the use of an alpha=0.01 (99% confidence interval).                                                                                                                                     |               |                                                               |                                                                                                   |                  |                         |                            |              |                                                                                                  |                |
| <b>MI (Non-Fatal)</b> | 1           | Serious<br><br>Discrepancies exist in what is presented. The effect estimate presented in the paper used a 90% confidence interval, however in the original publication on design (1979) stated the use of an alpha=0.01 (99% confidence interval). | Not serious   | Serious<br><br>100% male population, majority European (96%). | Serious<br><br>Summary confidence intervals contains both important benefits and potential harms. | Undetected       | 3,806                   | RR 0.82 (95% CI 0.66-1.03) | N/A          | Very low<br><br>This outcome had three serious (-3) therefore <b>downgrade by 3 to very low.</b> |                |
| <b>Stroke (All)</b>   | 1           | Serious<br><br>Discrepancies exist in what is presented. The effect estimate presented in the paper used                                                                                                                                            | Not serious   | Serious<br><br>100% male population, majority European (96%). | Serious<br><br>Summary confidence intervals contains both important                               | Undetected       | 3,806                   | RR 1.21 (95% CI 0.60-2.45) | N/A          | Very low<br><br>This outcome had three serious (-3) therefore <b>downgrade</b>                   |                |

| Outcome                         | No. of RCTs | Risk of Bias                                                                                                                               | Inconsistency | Indirectness                                                                                                                                  | Imprecision                                                                                               | Publication Bias | No. of Patients (range) | Effect Estimate (range)    | Median (IQR) | Certainty                                                                                                                | Other Comments |
|---------------------------------|-------------|--------------------------------------------------------------------------------------------------------------------------------------------|---------------|-----------------------------------------------------------------------------------------------------------------------------------------------|-----------------------------------------------------------------------------------------------------------|------------------|-------------------------|----------------------------|--------------|--------------------------------------------------------------------------------------------------------------------------|----------------|
|                                 |             | a 90% confidence interval, however in the original publication on design (1979) stated the use of an alpha=0.01 (99% confidence interval). |               |                                                                                                                                               | benefits and potential harms.                                                                             |                  |                         |                            |              | by 3 to very low.                                                                                                        |                |
| <b>Secondary Prevention</b>     |             |                                                                                                                                            |               |                                                                                                                                               |                                                                                                           |                  |                         |                            |              |                                                                                                                          |                |
| <b>MACE</b>                     | 1           | Not serious                                                                                                                                | Not serious   | Serious<br><br>Primarily male population (19% female); MACE definition is not congruent with traditional 3-point and includes CAD progression | Very serious<br><br>The 95% CI contains both important benefits and harms; very small sample size (n=143) | Undetected       | 143                     | OR 0.60 (95% CI 0.30-1.21) | N/A          | Very low<br><br>This outcome had one serious (-1) and one very serious (-2) therefore <b>downgrade by 3 to very low.</b> |                |
| <b>Adverse Events (Overall)</b> |             |                                                                                                                                            |               |                                                                                                                                               |                                                                                                           |                  |                         |                            |              |                                                                                                                          |                |
| <b>Overall AEs</b>              | 1 SR        | Not serious                                                                                                                                | Not serious   | Very serious<br><br>Diabetic population (not CVD) looking at                                                                                  | Not serious                                                                                               | Undetected       | 2,714                   | RR 1.09 (95% CI 1.02-1.17) | N/A          | Low<br><br>This outcome had one very                                                                                     |                |

| Outcome                                  | No. of RCTs | Risk of Bias | Inconsistency | Indirectness                                                                                                                                         | Imprecision                                                                    | Publication Bias | No. of Patients (range) | Effect Estimate (range)    | Median (IQR) | Certainty                                                                                                                | Other Comments |
|------------------------------------------|-------------|--------------|---------------|------------------------------------------------------------------------------------------------------------------------------------------------------|--------------------------------------------------------------------------------|------------------|-------------------------|----------------------------|--------------|--------------------------------------------------------------------------------------------------------------------------|----------------|
|                                          |             |              |               | glycemic control. Only pulled harms data from this SR. Older RCTs did not report harms.                                                              |                                                                                |                  |                         |                            |              | serious (-2) therefore <b>downgrade by 2 to low.</b>                                                                     |                |
| <b>Serious AEs</b>                       | 1 SR        | Not serious  | Not serious   | Very serious<br><br>Diabetic population (not CVD) looking at glycemic control. Only pulled harms data from this SR. Older RCTs did not report harms. | Not serious                                                                    | Undetected       | 2,484                   | RR 1.56 (95% CI 1.01-2.40) | N/A          | Low<br><br>This outcome had one very serious (-2) therefore <b>downgrade by 2 to low.</b>                                |                |
| <b>Withdrawals due to Adverse Events</b> | 1 SR        | Not serious  | Not serious   | Very serious<br><br>Diabetic population (not CVD) looking at glycemic control. Only pulled harms data from this SR. Older RCTs did not report harms. | Serious<br><br>Confidence intervals contain both important benefits and harms. | Undetected       | 2,501                   | RR 1.48 (95% CI 0.91-2.42) | N/A          | Very low<br><br>This outcome had one serious (-1) and one very serious (-2) therefore <b>downgrade by 3 to very low.</b> |                |



Ezetimibe

| Outcome                    | No. of SRs | Risk of Bias | Inconsistency                                                                        | Indirectness                                                                                                                                                 | Imprecision                                                              | Publication Bias                                                                         | No. of Patients (range) | Effect Estimate (range) | Median (IQR)        | Certainty                                                                                  | Other Comments |
|----------------------------|------------|--------------|--------------------------------------------------------------------------------------|--------------------------------------------------------------------------------------------------------------------------------------------------------------|--------------------------------------------------------------------------|------------------------------------------------------------------------------------------|-------------------------|-------------------------|---------------------|--------------------------------------------------------------------------------------------|----------------|
| Overall                    |            |              |                                                                                      |                                                                                                                                                              |                                                                          |                                                                                          |                         |                         |                     |                                                                                            |                |
| <b>MACE</b>                | 3          | Not serious  | Not serious                                                                          | Serious<br>One study (N= 18,144) contributed ≥85% data and was in a post-MI population. Definition of MACE included revascularization, could be very serious | Not serious                                                              | Undetected<br>Only one (Cochrane) had more than 10 studies. No ne found publication bias | 18,921-21,727           | RR 0.93-0.94            | RR 0.93 (0.93-0.94) | Moderate<br>This outcome had one serious (-1) therefore <b>downgrade by 1 to moderate.</b> |                |
| <b>CV Mortality</b>        | 2          | Not serious  | Not serious                                                                          | Serious<br>One study (N= 18,144) contributed ≥85% data and was in a post-MI population.                                                                      | Not serious                                                              | Undetected                                                                               | 18,967-19,457           | RR 1.00-1.00            | RR 1.00             | Moderate<br>This outcome had one serious (-1) therefore <b>downgrade by 1 to moderate.</b> |                |
| <b>All-Cause Mortality</b> | 2          | Not serious  | Not serious<br>Noted some inconsistency in point estimate but borderline and already | Serious<br>One study (N= 18,144) contributed ≥85% data and was in a                                                                                          | Serious<br>CI broad and could include important risk of harm or benefit. | Undetected                                                                               | 19,968-21,222           | RR 0.89-0.98            | RR 0.94             | Low<br>This outcome had two serious (-2) therefore <b>downgrade by 2 to low.</b>           |                |

| Outcome                    | No. of SRs | Risk of Bias | Inconsistency             | Indirectness                                                                                         | Imprecision                                                  | Publication Bias | No. of Patients (range) | Effect Estimate (range)    | Median (IQR) | Certainty                                                                                           | Other Comments                                      |
|----------------------------|------------|--------------|---------------------------|------------------------------------------------------------------------------------------------------|--------------------------------------------------------------|------------------|-------------------------|----------------------------|--------------|-----------------------------------------------------------------------------------------------------|-----------------------------------------------------|
|                            |            |              | penalized in imprecision. | post-MI population.                                                                                  |                                                              |                  |                         |                            |              |                                                                                                     |                                                     |
| <b>MI (All)</b>            | 1          | Not serious  | Not serious               | Serious<br><br>One study (N= 18,144) contributed ≥85% data and was in a post-MI population.          | Not serious                                                  | Undetected       |                         | OR 0.86 (95% CI 0.79-0.95) | N/A          | Moderate<br><br>This outcome had one serious (-1) therefore <b>downgrade by 1 to moderate.</b>      | CIs do not overlap                                  |
| <b>Stroke (All)</b>        | 1          | Not serious  | Not serious               | Serious<br><br>One study (N= 18,144) contributed ≥85% data and was in a post-MI population.          | Not serious                                                  | Undetected       | 20,585                  | OR 0.86 (95% CI 0.74-1.00) | N/A          | Moderate<br><br>This outcome had one serious (-1) therefore <b>downgrade by 1 to moderate.</b>      | Toyota was only SR so reviewed the metagraphs of SR |
| <b>Primary Prevention</b>  |            |              |                           |                                                                                                      |                                                              |                  |                         |                            |              |                                                                                                     |                                                     |
| <b>MACE</b>                | 1 (1 RCT)  | Not serious  | Not serious               | Very serious<br><br>Trial in familial hypercholesterolemia and primary outcome was intimal thickness | Very serious<br><br>Very small trial with 17 outcomes        | Undetected       | 720                     | RR 1.45 (95% CI 0.56-3.77) | N/A          | Very low<br><br>This outcome had two very serious (-4) therefore <b>downgrade by 4 to very low.</b> |                                                     |
| <b>All-Cause Mortality</b> | 2 trials   | Not serious  | Not serious               | Very serious<br><br>Larger trial in familial hypercholesterolemia and primary outcome was            | Very serious<br><br>Very small event numbers (4) and high CI | Undetected       | 879                     | RR 0.78 (95% CI 0.16-3.89) | N/A          | Very low<br><br>This outcome had two very serious (-4) therefore <b>downgrade by 4 to very low.</b> |                                                     |

| Outcome                         | No. of SRs | Risk of Bias | Inconsistency | Indirectness                                                                                                                 | Imprecision | Publication Bias | No. of Patients (range) | Effect Estimate (range)    | Median (IQR) | Certainty | Other Comments                                                                        |
|---------------------------------|------------|--------------|---------------|------------------------------------------------------------------------------------------------------------------------------|-------------|------------------|-------------------------|----------------------------|--------------|-----------|---------------------------------------------------------------------------------------|
|                                 |            |              |               | intimal thickness. Other study compared fibrate not statin.                                                                  |             |                  |                         |                            |              |           |                                                                                       |
| <b>Secondary Prevention</b>     |            |              |               |                                                                                                                              |             |                  |                         |                            |              |           |                                                                                       |
| <b>MACE</b>                     | 1          | Not serious  | Not serious   | Serious<br>MACE outcome included revascularization                                                                           | Not serious | Undetected       | 20,745                  | RR 0.94 (95% CI 0.90-0.98) | N/A          | Moderate  | This outcome had one serious <b>(-1)</b> therefore <b>downgrade by 1 to moderate.</b> |
| <b>All-Cause Mortality</b>      | 1          | Not serious  | Not serious   | Not serious                                                                                                                  | Not serious | Undetected       | 20,343                  | RR 0.98 (95% CI 0.91-1.05) | N/A          | High      | This outcome has no downgrades.                                                       |
| <b>Patients with Diabetes</b>   |            |              |               |                                                                                                                              |             |                  |                         |                            |              |           |                                                                                       |
| <b>MACE</b>                     | 1          | Not serious  | Not serious   | Very serious<br>MACE definition includes revascularization<br>All from subgroups analysis and mostly in secondary prevention | Not serious | Undetected       | 5,195                   | RR 0.86 (95% CI 0.78-0.94) | N/A          | Low       | This outcome had one very serious <b>(-2)</b> therefore <b>downgrade by 2 to low.</b> |
| <b>Adverse Events (Overall)</b> |            |              |               |                                                                                                                              |             |                  |                         |                            |              |           |                                                                                       |
| <b>Withdrawals</b>              | 1          | Not serious  | Not serious   | Not serious                                                                                                                  | Not serious | Undetected       | 21,746                  | RR 0.91 (95% CI 0.75-1.09) | N/A          | High      | This outcome has no downgrades.                                                       |

Fibrates

| Outcome                    | No. of SRs | Risk of Bias                                                                                            | Inconsistency                                   | Indirectness                                                    | Imprecision | Publication Bias                                                               | No. of Patients (range) | Effect Estimate (range)    | Median (IQR)        | Certainty                                                                                             | Other Comments |
|----------------------------|------------|---------------------------------------------------------------------------------------------------------|-------------------------------------------------|-----------------------------------------------------------------|-------------|--------------------------------------------------------------------------------|-------------------------|----------------------------|---------------------|-------------------------------------------------------------------------------------------------------|----------------|
| <b>Overall Outcomes</b>    |            |                                                                                                         |                                                 |                                                                 |             |                                                                                |                         |                            |                     |                                                                                                       |                |
| <b>MACE</b>                | 2          | Not serious<br><br>However, 7/19 trials rated as high risk of bias in at least one domain by SR authors | Not serious<br><br>$I^2 = 0\%$ , 45.25%         | Not serious                                                     | Not serious | Strongly suspected<br><br>Multiple outcomes suggest publication bias in one SR | 16,064-16,135           | RR 0.84-0.88               | RR 0.86             | Moderate<br><br>This outcome had one serious <b>(-1)</b> therefore <b>downgrade by 1 to moderate.</b> |                |
| <b>CV Mortality</b>        | 1          | Not serious                                                                                             | Not serious<br><br>$I^2 = 11.34\%$              | Not serious                                                     | Not serious | Undetected                                                                     | 13,653                  | RR 0.95 (95% CI 0.86-1.05) | N/A                 | High<br><br>This outcome has no downgrades.                                                           |                |
| <b>All-Cause Mortality</b> | 3          | Not serious                                                                                             | Not serious<br><br>$I^2 = 0\%$ , 22.73% and 33% | Not serious                                                     | Not serious | Strongly suspected<br><br>Multiple outcomes suggest publication bias in one SR | 8,471-45,935            | RR 0.98-1.01               | RR 0.98 (0.98-1.01) | Moderate<br><br>This outcome had one serious <b>(-1)</b> therefore <b>downgrade by 1 to moderate.</b> |                |
| <b>MI (All)</b>            | 3          | Not serious                                                                                             | Not serious<br><br>All $I^2 < 25\%$             | Serious<br><br>One SR did not combine fatal and non-fatal MI's) | Not serious | Strongly suspected<br><br>Multiple outcomes suggest publication                | 13,942-45,445           | RR 0.79-0.86               | RR 0.80 (0.79-0.86) | Low<br><br>This outcome had two serious <b>(-2)</b> therefore <b>downgrade by 2 to low.</b>           |                |

| Outcome                    | No. of SRs | Risk of Bias                                                                                            | Inconsistency                           | Indirectness                                                                                    | Imprecision | Publication Bias                                                 | No. of Patients (range) | Effect Estimate (range)    | Median (IQR) | Certainty | Other Comments                                                                   |
|----------------------------|------------|---------------------------------------------------------------------------------------------------------|-----------------------------------------|-------------------------------------------------------------------------------------------------|-------------|------------------------------------------------------------------|-------------------------|----------------------------|--------------|-----------|----------------------------------------------------------------------------------|
|                            |            |                                                                                                         |                                         |                                                                                                 |             | bias in one SR                                                   |                         |                            |              |           |                                                                                  |
| <b>Stroke (All)</b>        | 2          | Not serious                                                                                             | Not serious<br>All I <sup>2</sup> < 25% | Not serious                                                                                     | Not serious | Undetected                                                       | 11,719-43,188           | RR 1.01-1.03               | RR 1.02      | High      | This outcome has no downgrades.                                                  |
| <b>Primary Prevention</b>  |            |                                                                                                         |                                         |                                                                                                 |             |                                                                  |                         |                            |              |           |                                                                                  |
| <b>MACE</b>                | 1          | Serious<br>3/6 included trials were rated as high risk of bias in at least one domain by the SR authors | Not serious<br>I <sup>2</sup> = 0%      | Serious<br>4/6 trials had only diabetic patients enrolled, 73.2% patients overall were diabetic | Not serious | Strongly suspected<br>Multiple outcomes suggest publication bias | 16,135                  | RR 0.84 (95% CI 0.74-0.96) | RR 0.84      | Very low  | This outcome had three serious (-3) therefore <b>downgrade by 3 to very low.</b> |
| <b>All-Cause Mortality</b> | 1          | Serious<br>3/6 included trials were rated as high risk of bias in at least one domain by the SR authors | Not serious<br>I <sup>2</sup> = 0%      | Serious<br>4/6 trials had only diabetic patients enrolled, 73.2% patients overall were diabetic | Not serious | Strongly suspected<br>Multiple outcomes suggest publication bias | 8,471                   | RR 1.01 (95% CI 0.81-1.26) | RR 1.01      | Very low  | This outcome had three serious (-3) therefore <b>downgrade by 3 to very low.</b> |
| <b>MI (All)</b>            | 1          | Serious<br>3/6 included                                                                                 | Not serious<br>I <sup>2</sup> = 0.24%   | Serious<br>4/6 trials had only                                                                  | Not serious | Strongly suspected                                               | 16,135                  | RR 0.79 (95% CI 0.68-0.92) | RR 0.79      | Very low  | This outcome had three serious (-3)                                              |

| Outcome                         | No. of SRs | Risk of Bias                                                                    | Inconsistency                  | Indirectness                                                     | Imprecision | Publication Bias                           | No. of Patients (range) | Effect Estimate (range)    | Median (IQR) | Certainty | Other Comments                               |
|---------------------------------|------------|---------------------------------------------------------------------------------|--------------------------------|------------------------------------------------------------------|-------------|--------------------------------------------|-------------------------|----------------------------|--------------|-----------|----------------------------------------------|
|                                 |            | trials were rated as high risk of bias in at least one domain by the SR authors |                                | diabetic patients enrolled, 73.2% patients overall were diabetic |             | Multiple outcomes suggest publication bias |                         |                            |              |           | therefore <b>downgrade by 3 to very low.</b> |
| <b>Secondary Prevention</b>     |            |                                                                                 |                                |                                                                  |             |                                            |                         |                            |              |           |                                              |
| <b>MACE</b>                     | 1          | Not serious                                                                     | Not serious<br>$I^2 = 45.25\%$ | Not serious                                                      | Not serious | Undetected                                 | 16,064                  | RR 0.88 (95% CI 0.81-0.97) | RR 0.88      | High      | This outcome has no downgrades.              |
| <b>CV Mortality</b>             | 1          | Not serious                                                                     | Not serious<br>$I^2 = 11.34\%$ | Not serious                                                      | Not serious | Undetected                                 | 13,653                  | RR 0.95 (95% CI 0.86-1.05) | RR 0.95      | High      | This outcome has no downgrades.              |
| <b>All-Cause Mortality</b>      | 1          | Not serious                                                                     | Not serious<br>$I^2 = 22.73\%$ | Not serious                                                      | Not serious | Undetected                                 | 13,653                  | RR 0.98 (95% CI 0.91-1.06) | RR 0.98      | High      | This outcome has no downgrades.              |
| <b>MI (All)</b>                 | 1          | Not serious                                                                     | Not serious<br>$I^2 = 23.62\%$ | Not serious                                                      | Not serious | Undetected                                 | 13,942                  | RR 0.86 (95% CI 0.80-0.93) | RR 0.86      | High      | This outcome has no downgrades.              |
| <b>Stroke (All)</b>             | 1          | Not serious                                                                     | Not serious<br>$I^2 = 11.44\%$ | Not serious                                                      | Not serious | Undetected                                 | 11,719                  | RR 1.03 (95% CI 0.91-1.16) | RR 1.03      | High      | This outcome has no downgrades.              |
| <b>Adverse Events (Overall)</b> |            |                                                                                 |                                |                                                                  |             |                                            |                         |                            |              |           |                                              |

| Outcome     | No. of SRs | Risk of Bias                                                                                                | Inconsistency                  | Indirectness                                                                                        | Imprecision | Publication Bias                                                     | No. of Patients (range) | Effect Estimate (range)    | Median (IQR) | Certainty                                                                                       | Other Comments |
|-------------|------------|-------------------------------------------------------------------------------------------------------------|--------------------------------|-----------------------------------------------------------------------------------------------------|-------------|----------------------------------------------------------------------|-------------------------|----------------------------|--------------|-------------------------------------------------------------------------------------------------|----------------|
| Withdrawals | 1          | Serious<br><br>3/6 included trials were rated as high risk of bias in at least one domain by the SR authors | Serious<br><br>$I^2 = 73.88\%$ | Serious<br><br>4/6 trials had only diabetic patients enrolled, 73.2% patients overall were diabetic | Not serious | Strongly suspected<br><br>Multiple outcomes suggest publication bias | 4,805                   | RR 1.38 (95% CI 0.71-2.68) | RR 1.38      | Very low<br><br>This outcome had four serious (-4) therefore <b>downgrade by 4 to very low.</b> |                |

### Niacin

| Outcome                 | No. of SRs | Risk of Bias | Inconsistency | Indirectness | Imprecision | Publication Bias | No. of Patients (range) | Effect estimate (range) | Median (IQR)        | Certainty                                   | Other Comments                                                                                                   |
|-------------------------|------------|--------------|---------------|--------------|-------------|------------------|-------------------------|-------------------------|---------------------|---------------------------------------------|------------------------------------------------------------------------------------------------------------------|
| <b>Overall Outcomes</b> |            |              |               |              |             |                  |                         |                         |                     |                                             |                                                                                                                  |
| MACE                    | 2          | Not serious  | Not serious   | Not serious  | Not serious | Undetected       | 10,295-29,254           | RR 0.88-0.97            | RR 0.93             | High<br><br>This outcome has no downgrades. | Lots of COI, no RoB analysis in one of 2 SRs (Jenkins), but results consistent with higher-quality SR (D'Andrea) |
| CV Mortality            | 5          | Not serious  | Not serious   | Not serious  | Not serious | Undetected       | 3,581-35,652            | RR 0.91-1.14            | RR 0.99 (0.95-1.08) | High<br><br>This outcome has no downgrades. | Multiple COIs with 2 SRs, though results consistent with others                                                  |
| All-Cause Mortality     | 4          | Not serious  | Not serious   | Not serious  | Not serious | Undetected       | 29,195-35,543           | RR 0.99-1.05            | RR 1.04 (1.00-1.05) | High<br><br>This outcome has no downgrades. | Multiple COIs with 2 SRs, though results consistent with others                                                  |

| Outcome      | No. of SRs | Risk of Bias | Inconsistency | Indirectness | Imprecision | Publication Bias | No. of Patients (range) | Effect estimate (range) | Median (IQR)        | Certainty                                   | Other Comments                                                  |
|--------------|------------|--------------|---------------|--------------|-------------|------------------|-------------------------|-------------------------|---------------------|---------------------------------------------|-----------------------------------------------------------------|
| MI (All)     | 4          | Not serious  | Not serious   | Not serious  | Not serious | Undetected       | 30,196-35,643           | RR 0.87-0.96            | RR 0.91 (0.88-0.95) | High<br><br>This outcome has no downgrades. | Multiple COIs with 2 SRs, though results consistent with others |
| Stroke (All) | 5          | Not serious  | Not serious   | Not serious  | Not serious | Undetected       | 30,196-34,875           | RR 0.89-1.01            | RR 0.95 (0.91-0.98) | High<br><br>This outcome has no downgrades. | Multiple COIs with 2 SRs, though results consistent with others |

### Omega-3 Fatty Acids

| Outcome                            | No. of SRs | Risk of Bias                                                               | Inconsistency | Indirectness                                                                       | Imprecision | Publication Bias | No. of Patients (range) | Effect Estimate (range) | Median (IQR)        | Certainty                                                                                      | Other Comments |
|------------------------------------|------------|----------------------------------------------------------------------------|---------------|------------------------------------------------------------------------------------|-------------|------------------|-------------------------|-------------------------|---------------------|------------------------------------------------------------------------------------------------|----------------|
| <b>Overall Outcomes: EPA + DHA</b> |            |                                                                            |               |                                                                                    |             |                  |                         |                         |                     |                                                                                                |                |
| MACE                               | 3          | Not serious                                                                | Not serious   | Serious<br><br>Aung included revascularization, the other 2 SRs didn't define MACE | Not serious | Not detected     | 337-25,871              | RR 0.97-0.99            | RR 0.98 (0.97-0.99) | Moderate<br><br>This outcome had one serious (-1) therefore <b>downgrade by 1 to moderate.</b> |                |
| CV Mortality                       | 5          | Serious<br><br>2 of the SRs have a low Amstar score (3/7), 2 others have a | Not serious   | Serious<br><br>Uncertain what outcomes were included – for example, OMEGA          | Not serious | Not detected     | 13-25,871               | RR 0.93-0.94            | RR 0.93 (0.93-0.94) | Low<br><br>This outcome had two serious (-2) therefore <b>downgrade by 2 to low.</b>           |                |



| Outcome                    | No. of SRs | Risk of Bias       | Inconsistency | Indirectness                                                                                                                        | Imprecision                                                                       | Publication Bias | No. of Patients (range) | Effect Estimate (range)    | Median (IQR) | Certainty | Other Comments                                                                                                                                                                              |
|----------------------------|------------|--------------------|---------------|-------------------------------------------------------------------------------------------------------------------------------------|-----------------------------------------------------------------------------------|------------------|-------------------------|----------------------------|--------------|-----------|---------------------------------------------------------------------------------------------------------------------------------------------------------------------------------------------|
|                            |            | medium score (5/7) |               | trial: 2/4 SR used sudden death; 2/4 used something else that was not defined but had more than double the events than sudden death |                                                                                   |                  |                         |                            |              |           |                                                                                                                                                                                             |
| <b>All-Cause Mortality</b> | 2          | Not serious        | Not serious   | Not serious                                                                                                                         | Not serious                                                                       | Not detected     | 13-25,871               | RR 0.97-0.98               | RR 0.98      | High      | This outcome has no downgrades.                                                                                                                                                             |
| <b>MI (Non-fatal)</b>      | 1          | Not serious        | Not serious   | Not serious                                                                                                                         | Serious<br><br>Lots of heterogeneity, effect size from RCTs ranged from 0.24-1.23 | Not detected     | 206-12,536              | OR 0.88 (95% CI 0.74-1.04) | N/A          | Moderate  | This outcome had one serious (-1) therefore <b>downgrade by 1 to moderate.</b>                                                                                                              |
| <b>Stroke (All)</b>        | 1          | Not serious        | Not serious   | Serious<br><br>Non-fatal strokes only                                                                                               | Serious<br><br>Wide CI 1.0-1.34; 5/6 RCTs on the harm side of 1, 1/6 RR 0.53      | Not detected     | 337-25,871              | RR 1.16 (95% CI 1.00-1.34) | N/A          | Low       | This outcome had two serious (-2) therefore <b>downgrade by 2 to low.</b><br><br>Non-fatal, ischemic and hemorrhagic strokes reported, not all strokes. Reported results here refer to non- |

| Outcome                           | No. of SRs | Risk of Bias | Inconsistency | Indirectness                       | Imprecision                                                         | Publication Bias | No. of Patients (range) | Effect Estimate (range)    | Median (IQR) | Certainty | Other Comments                                                                 |
|-----------------------------------|------------|--------------|---------------|------------------------------------|---------------------------------------------------------------------|------------------|-------------------------|----------------------------|--------------|-----------|--------------------------------------------------------------------------------|
|                                   |            |              |               |                                    |                                                                     |                  |                         |                            |              |           | fatal strokes as statistically significant                                     |
| <b>Atrial Fibrillation</b>        | 2          | Not serious  | Not serious   | Not serious                        | Serious<br><br>Wide CI: for 1 SR 0.88-1.46; for the other 1.02-1.49 | Not detected     | 182-15,480              | RR 1.14-1.23               | RR 1.19      | Moderate  | This outcome had one serious (-1) therefore <b>downgrade by 1 to moderate.</b> |
| <b>Overall Outcomes: EPA only</b> |            |              |               |                                    |                                                                     |                  |                         |                            |              |           |                                                                                |
| <b>MACE</b>                       | 1          | Not serious  | Not serious   | Serious<br><br>Did not define MACE | Not serious                                                         | Not detected     | 27,305                  | RR 0.78 (95% CI 0.71-0.85) | N/A          | Moderate  | This outcome had one serious (-1) therefore <b>downgrade by 1 to moderate.</b> |
| <b>CV Mortality</b>               | 2          | Not serious  | Not serious   | Not serious                        | Not serious                                                         | Not detected     | 8,159-27,062            | RR 0.82-0.82               | RR 0.82      | High      | This outcome has no downgrades.                                                |
| <b>All-Cause Mortality</b>        | 2          | Not serious  | Not serious   | Not serious                        | Not serious                                                         | Not detected     | 26,804-27,062           | RR 0.96-0.98               | RR 0.97      | High      | This outcome has no downgrades.                                                |
| <b>MI (Non-fatal)</b>             | 1          | Not serious  | Not serious   | Not serious                        | Not serious                                                         | Not detected     | 27,062                  | RR 0.72 (95% CI 0.62-0.84) | N/A          | High      | This outcome has no downgrades.                                                |
| <b>Stroke (All)</b>               | 1          | Not serious  | Not serious   | Serious                            | Not serious                                                         | Not detected     | 8,417                   | RR 0.71                    | N/A          | Moderate  |                                                                                |

| Outcome                    | No. of SRs | Risk of Bias | Inconsistency | Indirectness           | Imprecision | Publication Bias | No. of Patients (range) | Effect Estimate (range) | Median (IQR) | Certainty | Other Comments                                                                 |
|----------------------------|------------|--------------|---------------|------------------------|-------------|------------------|-------------------------|-------------------------|--------------|-----------|--------------------------------------------------------------------------------|
|                            |            |              |               | Non-fatal strokes only |             |                  |                         |                         |              |           | This outcome had one serious (-1) therefore <b>downgrade by 1 to moderate.</b> |
| <b>Atrial Fibrillation</b> | 1          | Not serious  | Not serious   | Not serious            | Not serious | Not detected     | 8,179                   | RR 1.35                 | N/A          | High      | This outcome has no downgrades.                                                |

PCSK9 Inhibitors

| Outcome                 | No. of SRs               | Risk of Bias | Inconsistency | Indirectness                                                                                                                                                                         | Imprecision | Publication Bias | No. of Patients (range) | Effect Estimate (Range) | Median (IQR)        | Certainty | Other Comments                                                                 |
|-------------------------|--------------------------|--------------|---------------|--------------------------------------------------------------------------------------------------------------------------------------------------------------------------------------|-------------|------------------|-------------------------|-------------------------|---------------------|-----------|--------------------------------------------------------------------------------|
| <b>Overall Outcomes</b> |                          |              |               |                                                                                                                                                                                      |             |                  |                         |                         |                     |           |                                                                                |
| <b>MACE</b>             | 16 (14 with usable data) | Not serious  | Not serious   | Serious<br>4/16 systematic reviews that report on MACE use the traditional 3-point composite; 2/16 do not report their definition and many provide a vague definition of "CV events" | Not serious | Undetected       | 24,803-92,736           | RR 0.80-0.89            | RR 0.84 (0.83-0.87) | Moderate  | This outcome had one serious (-1) therefore <b>downgrade by 1 to moderate.</b> |

| Outcome                    | No. of SRs               | Risk of Bias                                                                                                                                                           | Inconsistency                                                                                                                                                                           | Indirectness                                                                                                     | Imprecision                                                                        | Publication Bias | No. of Patients (range) | Effect Estimate (Range)    | Median (IQR)         | Certainty | Other Comments                                                                  |
|----------------------------|--------------------------|------------------------------------------------------------------------------------------------------------------------------------------------------------------------|-----------------------------------------------------------------------------------------------------------------------------------------------------------------------------------------|------------------------------------------------------------------------------------------------------------------|------------------------------------------------------------------------------------|------------------|-------------------------|----------------------------|----------------------|-----------|---------------------------------------------------------------------------------|
| <b>CV Mortality</b>        | 16 (14 with usable data) | Not serious                                                                                                                                                            | Not serious                                                                                                                                                                             | Not serious                                                                                                      | Not serious                                                                        | Undetected       | 20,570-96,709           | RR 0.87-1.01               | RR 0.95 (0.94-0.97)  | High      | This outcome has no downgrades.                                                 |
| <b>All-Cause Mortality</b> | 16 (14 with usable data) | Not serious                                                                                                                                                            | Not serious                                                                                                                                                                             | Not serious                                                                                                      | Not serious                                                                        | Undetected       | 1,234-96,427            | RR 0.43-1.01               | RR 0.93 (0.88, 0.95) | High      | This outcome has no downgrades.                                                 |
| <b>MI (All)</b>            | 15 (14 with usable data) | Not serious                                                                                                                                                            | Not serious                                                                                                                                                                             | Not serious                                                                                                      | Not serious                                                                        | Undetected       | 36,691-86,020           | RR 0.56-0.83               | RR 0.79 (0.77-0.80)  | High      | This outcome has no downgrades.                                                 |
| <b>Stroke (All)</b>        | 20 (19 with usable data) | Not serious                                                                                                                                                            | Not serious                                                                                                                                                                             | Not serious                                                                                                      | Not serious                                                                        | Undetected       | 34,793-94,408           | RR 0.74-0.81               | RR 0.77 (0.75-0.78)  | High      | This outcome has no downgrades.                                                 |
| <b>Primary Prevention</b>  |                          |                                                                                                                                                                        |                                                                                                                                                                                         |                                                                                                                  |                                                                                    |                  |                         |                            |                      |           |                                                                                 |
| <b>MACE</b>                | 1                        | Serious                                                                                                                                                                | Serious                                                                                                                                                                                 | Serious                                                                                                          | Serious                                                                            | Undetected       | 7,660                   | RR 0.65 (95% CI 0.35-1.21) | N/A                  | Very low  | This outcome had four serious (-4) therefore <b>downgrade by 4 to very low.</b> |
|                            |                          | Only one SR contributed data for primary prevention. While the AMSTAR was low risk of bias, 52% of the individual trials included in the SR were rated as high risk of | Only reported the overall results of their meta-analyses, however, did not include their forest plots, therefore unable to determine heterogeneity, confidence intervals or consistency | Criteria to be included as a primary prevention study was containing 60% or more of primary prevention patients. | Summary confidence intervals contains both important benefits and potential harms. |                  |                         |                            |                      |           |                                                                                 |

| Outcome                    | No. of SRs | Risk of Bias                                                                                                                                                                                                                   | Inconsistency                                                                                                                                                                                                                   | Indirectness                                                                                                                    | Imprecision                                                                                       | Publication Bias | No. of Patients (range) | Effect Estimate (Range)    | Median (IQR) | Certainty                                                                                       | Other Comments |
|----------------------------|------------|--------------------------------------------------------------------------------------------------------------------------------------------------------------------------------------------------------------------------------|---------------------------------------------------------------------------------------------------------------------------------------------------------------------------------------------------------------------------------|---------------------------------------------------------------------------------------------------------------------------------|---------------------------------------------------------------------------------------------------|------------------|-------------------------|----------------------------|--------------|-------------------------------------------------------------------------------------------------|----------------|
|                            |            | bias due to incomplete outcome reporting                                                                                                                                                                                       | between point estimates.                                                                                                                                                                                                        |                                                                                                                                 |                                                                                                   |                  |                         |                            |              |                                                                                                 |                |
| <b>CV Mortality</b>        | 1          | Serious<br><br>Only one SR contributed data for primary prevention. While the AMSTAR was low risk of bias, 52% of the individual trials included in the SR were rated as high risk of bias due to incomplete outcome reporting | Serious<br><br>Only reported the overall results of their meta-analyses, however, did not include their forest plots, therefore unable to determine heterogeneity, confidence intervals or consistency between point estimates. | Serious<br><br>Criteria to be included as a primary prevention study was containing 60% or more of primary prevention patients. | Serious<br><br>Summary confidence intervals contains both important benefits and potential harms. | Undetected       | 10,225                  | RR 0.63 (95% CI 0.21-1.87) | N/A          | Very low<br><br>This outcome had four serious (-4) therefore <b>downgrade by 4 to very low.</b> |                |
| <b>All-Cause Mortality</b> | 1          | Serious<br><br>Only one SR contributed data for primary prevention. While the AMSTAR was low risk of bias, 52% of the individual trials included in the SR                                                                     | Serious<br><br>Only reported the overall results of their meta-analyses, however, did not include their forest plots, therefore unable to determine heterogeneity, confidence intervals or                                      | Serious<br><br>Criteria to be included as a primary prevention study was containing 60% or more of primary prevention patients. | Serious<br><br>Summary confidence intervals contains both important benefits and potential harms. | Undetected       | 10,225                  | RR 0.42 (95 CI 0.16-1.12)  | N/A          | Very low<br><br>This outcome had two serious (-4) therefore <b>downgrade by 4 to very low.</b>  |                |

| Outcome                     | No. of SRs | Risk of Bias                                                                                                                                                                                                                   | Inconsistency                                                                                                                                                                                                                   | Indirectness                                                                                                                                 | Imprecision                                                                                       | Publication Bias | No. of Patients (range) | Effect Estimate (Range)    | Median (IQR)        | Certainty                                                                                       | Other Comments |
|-----------------------------|------------|--------------------------------------------------------------------------------------------------------------------------------------------------------------------------------------------------------------------------------|---------------------------------------------------------------------------------------------------------------------------------------------------------------------------------------------------------------------------------|----------------------------------------------------------------------------------------------------------------------------------------------|---------------------------------------------------------------------------------------------------|------------------|-------------------------|----------------------------|---------------------|-------------------------------------------------------------------------------------------------|----------------|
|                             |            | were rated as high risk of bias due to incomplete outcome reporting                                                                                                                                                            | consistency between point estimates.                                                                                                                                                                                            |                                                                                                                                              |                                                                                                   |                  |                         |                            |                     |                                                                                                 |                |
| <b>Stroke (All)</b>         | 1          | Serious<br><br>Only one SR contributed data for primary prevention. While the AMSTAR was low risk of bias, 52% of the individual trials included in the SR were rated as high risk of bias due to incomplete outcome reporting | Serious<br><br>Only reported the overall results of their meta-analyses, however, did not include their forest plots, therefore unable to determine heterogeneity, confidence intervals or consistency between point estimates. | Serious<br><br>Criteria to be included as a primary prevention study was containing 60% or more of primary prevention patients.              | Serious<br><br>Summary confidence intervals contains both important benefits and potential harms. | Undetected       | 8,064                   | RR 0.52 (95% CI 0.19-1.45) | N/A                 | Very low<br><br>This outcome had four serious (-4) therefore <b>downgrade by 4 to very low.</b> |                |
| <b>Secondary Prevention</b> |            |                                                                                                                                                                                                                                |                                                                                                                                                                                                                                 |                                                                                                                                              |                                                                                                   |                  |                         |                            |                     |                                                                                                 |                |
| <b>MACE</b>                 | 4          | Not serious                                                                                                                                                                                                                    | Not serious                                                                                                                                                                                                                     | Serious<br><br>All four of the included SRs that report on this outcome use a different definition (traditional 3-point MACE, traditional or | Not serious                                                                                       | Undetected       | 30,738-78,566           | RR 0.80-0.89               | RR 0.84 (0.81-0.88) | Moderate<br><br>This outcome had one serious (-1) therefore <b>downgrade by 1 to moderate.</b>  |                |

| Outcome                       | No. of SRs | Risk of Bias                   | Inconsistency                                                                                                                | Indirectness                                                                     | Imprecision | Publication Bias | No. of Patients (range) | Effect Estimate (Range)    | Median (IQR)        | Certainty | Other Comments                                                                 |
|-------------------------------|------------|--------------------------------|------------------------------------------------------------------------------------------------------------------------------|----------------------------------------------------------------------------------|-------------|------------------|-------------------------|----------------------------|---------------------|-----------|--------------------------------------------------------------------------------|
|                               |            |                                |                                                                                                                              | nearest equivalent, CV death, MI, stroke, or definitions from individual trials) |             |                  |                         |                            |                     |           |                                                                                |
| <b>CV Mortality</b>           | 4          | Not serious                    | Not serious                                                                                                                  | Not serious                                                                      | Not serious | Undetected       | 5,337-79,003            | RR 0.76-1.11               | RR 0.95 (0.81-1.07) | High      | This outcome had no downgrades.                                                |
| <b>All-Cause Mortality</b>    | 3          | Not serious                    | Not serious                                                                                                                  | Not serious                                                                      | Not serious | Undetected       | 52,504-78,033           | RR 0.86-0.94               | RR 0.94 (0.86-0.94) | High      | This outcome had no downgrades.                                                |
| <b>MI (All)</b>               | 3          | Not serious                    | Not serious                                                                                                                  | Not serious                                                                      | Not serious | Undetected       | 5,337-54,002            | RR 0.74-0.80               | RR 0.75 (0.74-0.80) | High      | This outcome had no downgrades.                                                |
| <b>Stroke (All)</b>           | 5          | Not serious                    | Serious<br>2/5 systematic reviews were not statistically significant, with one SR containing benefit but also potential harm | Not serious                                                                      | Not serious | Undetected       | 6,281-78,566            | RR 0.75-0.90               | RR 0.77 (0.76-0.85) | Moderate  | This outcome had one serious (-1) therefore <b>downgrade by 1 to moderate.</b> |
| <b>Patients with Diabetes</b> |            |                                |                                                                                                                              |                                                                                  |             |                  |                         |                            |                     |           |                                                                                |
| <b>MACE</b>                   | 1          | Serious<br>Only one systematic | Not serious                                                                                                                  | Not serious                                                                      | Not serious | Undetected       | 16,700                  | RR 0.84 (95% CI 0.76-0.92) | N/A                 | Moderate  | This outcome had one                                                           |

| Outcome                    | No. of SRs | Risk of Bias                                                                                                                                                                                                                           | Inconsistency | Indirectness | Imprecision                                                                                                                                                     | Publication Bias | No. of Patients (range) | Effect Estimate (Range)    | Median (IQR) | Certainty                                                                                                                | Other Comments |
|----------------------------|------------|----------------------------------------------------------------------------------------------------------------------------------------------------------------------------------------------------------------------------------------|---------------|--------------|-----------------------------------------------------------------------------------------------------------------------------------------------------------------|------------------|-------------------------|----------------------------|--------------|--------------------------------------------------------------------------------------------------------------------------|----------------|
|                            |            | review reported data on this population and only searched MEDLINE. It is also unclear if they utilized dual title and full text screening. The risk of bias of the included trials was overall low.                                    |               |              |                                                                                                                                                                 |                  |                         |                            |              | serious (-1) therefore <b>downgrade by 1 to moderate.</b>                                                                |                |
| <b>All-Cause Mortality</b> | 1          | Serious<br><br>Only one systematic review reported data on this population and only searched MEDLINE. It is also unclear if they utilized dual title and full text screening. The risk of bias of the included trials was overall low. | Not serious   | Not serious  | Very serious<br><br>For this outcome, <2000 participants contributed to the forest plot. The effect estimate was OR 0.53 95% CI 0.08-3.59, which is quite wide. | Undetected       | 739                     | RR 0.53 (95% CI 0.08-3.59) | N/A          | Very low<br><br>This outcome had one serious (-1) and one very serious (-2) therefore <b>downgrade by 3 to very low.</b> |                |
| Adverse Events (Overall)   |            |                                                                                                                                                                                                                                        |               |              |                                                                                                                                                                 |                  |                         |                            |              |                                                                                                                          |                |



| Outcome            | No. of SRs | Risk of Bias | Inconsistency | Indirectness | Imprecision | Publication Bias | No. of Patients (range) | Effect Estimate (Range) | Median (IQR)        | Certainty | Other Comments                  |
|--------------------|------------|--------------|---------------|--------------|-------------|------------------|-------------------------|-------------------------|---------------------|-----------|---------------------------------|
| <b>Overall AEs</b> | 5          | Not serious  | Not serious   | Not serious  | Not serious | Undetected       | 24,748-59,536           | RR 0.99-1.01            | RR 1.00 (0.99-1.01) | High      | This outcome had no downgrades. |
| <b>Serious AEs</b> | 8          | Not serious  | Not serious   | Not serious  | Not serious | Undetected       | 24,773-62,281           | RR 0.94-0.99            | RR 0.97 (0.96-0.99) | High      | This outcome had no downgrades. |
| <b>Withdrawals</b> | 4          | Not serious  | Not serious   | Not serious  | Not serious | Undetected       | 55,289-66,623           | RR 0.99-1.08            | RR 1.05 (1.00-1.08) | High      | This outcome had no downgrades. |

### Statins

| Outcome                    | No. of SRs                 | Risk of Bias | Inconsistency | Indirectness | Imprecision | Publication Bias | No. of Patients (range) | Effect Estimate (range) | Median (IQR)        | Certainty | Other Comments                                       |
|----------------------------|----------------------------|--------------|---------------|--------------|-------------|------------------|-------------------------|-------------------------|---------------------|-----------|------------------------------------------------------|
| <b>Overall Outcomes</b>    |                            |              |               |              |             |                  |                         |                         |                     |           |                                                      |
| <b>MACE</b>                | 7 (6 used in calculations) | Not serious  | Not serious   | Not serious  | Not serious | Undetected       | 23,805-88,876           | RR 0.71-0.78            | RR 0.74 (0.71-0.76) | High      | Definitions varied but did not affect point estimate |
| <b>CV Mortality</b>        | 8 (7 used in calculations) | Not serious  | Not serious   | Not serious  | Not serious | Undetected       | 34,012-134,059          | RR 0.80-0.90            | RR 0.85 (0.83-0.86) | High      | This outcome had no downgrades.                      |
| <b>All-Cause Mortality</b> | 9 (8 used in calculations) | Not serious  | Not serious   | Not serious  | Not serious | Undetected       | 47,083-143,995          | RR 0.87-0.93            | RR 0.91 (0.88-0.92) | High      | This outcome                                         |

| Outcome                   | No. of SRs | Risk of Bias | Inconsistency                                 | Indirectness | Imprecision                                               | Publication Bias | No. of Patients (range) | Effect Estimate (range) | Median (IQR)        | Certainty          | Other Comments                                                                 |
|---------------------------|------------|--------------|-----------------------------------------------|--------------|-----------------------------------------------------------|------------------|-------------------------|-------------------------|---------------------|--------------------|--------------------------------------------------------------------------------|
|                           |            |              |                                               |              |                                                           |                  |                         |                         |                     | had no downgrades. |                                                                                |
| <b>MI (All)</b>           | 4          | Not serious  | Not serious                                   | Not serious  | Not serious                                               | Undetected       | 17,856-121,190          | RR 0.56-0.73            | RR 0.69 (0.59-0.73) | High               | This outcome had no downgrades.                                                |
| <b>MI (Fatal)</b>         | 3          | Not serious  | Not serious                                   | Not serious  | Serious<br>Rationale:<br>Li 2019 has wider CI (0.24-0.98) | Undetected       | NR-10,975               | RR 0.49-0.73            | RR 0.72 (0.49-0.73) | Moderate           | This outcome had one serious (-1) therefore <b>downgrade by 1 to moderate.</b> |
| <b>MI (Non-fatal)</b>     | 2          | Not serious  | Not serious                                   | Not serious  | Not serious                                               | Undetected       | NR-41,191               | RR 0.60-0.62            | RR 0.61             | High               | This outcome had no downgrades.                                                |
| <b>Stroke (All)</b>       | 6          | Not serious  | Not serious                                   | Not serious  | Not serious                                               | Undetected       | 35,622-131,086          | RR 0.70-0.86            | RR 0.79 (0.76-0.82) | High               | This outcome had no downgrades.                                                |
| <b>Stroke (Fatal)</b>     | 3          | Not serious  | Serious<br>Variances in RR (0.63, 0.79, 1.11) | Not serious  | Serious<br>Wider CIs (e.g. 0.18-2.23)                     | Undetected       | NR-27,238               | RR 0.63-1.11            | RR 0.79 (0.63-1.11) | Low                | This outcome had two serious (-2) therefore <b>downgrade by 2 to low.</b>      |
| <b>Stroke (Non-fatal)</b> | 2          | Not serious  | Not serious                                   | Not serious  | Not serious                                               | Undetected       | NR-28,097               | RR 0.69-0.84            | RR 0.77             | High               |                                                                                |

| Outcome                    | No. of SRs | Risk of Bias | Inconsistency                                                                                                                                                                   | Indirectness                                    | Imprecision                                                       | Publication Bias | No. of Patients (range) | Effect Estimates (range) | Median (IQR)        | Certainty                                                                                      | Other Comments                                                                            |
|----------------------------|------------|--------------|---------------------------------------------------------------------------------------------------------------------------------------------------------------------------------|-------------------------------------------------|-------------------------------------------------------------------|------------------|-------------------------|--------------------------|---------------------|------------------------------------------------------------------------------------------------|-------------------------------------------------------------------------------------------|
|                            |            |              |                                                                                                                                                                                 |                                                 |                                                                   |                  |                         |                          |                     | This outcome had no downgrades.                                                                |                                                                                           |
| <b>Primary Prevention</b>  |            |              |                                                                                                                                                                                 |                                                 |                                                                   |                  |                         |                          |                     |                                                                                                |                                                                                           |
| <b>MACE</b>                | 6          | Not serious  | Not serious                                                                                                                                                                     | Serious<br><br>Variation in definitions of MACE | Not serious                                                       | Undetected       | 12,820-88,876           | RR 0.71-0.79             | RR 0.75 (0.73-0.78) | Moderate<br><br>This outcome had one serious (-1) therefore <b>downgrade by 1 to moderate.</b> | Definitions varied but did not affect point estimate                                      |
| <b>CV Mortality</b>        | 7          | Not serious  | Serious<br><br>4 out of 7 SRs statistically significant; 2 SRs have wider CIs (Kim 2020: 0.66-1.01; Ponce 2019: 0.83-1.24); one outlier for point estimate (Ponce 2019 RR 1.01) | Not serious                                     | Not serious<br><br>Wider CIs already downgraded for inconsistency | Undetected       | 15,076-95,959           | RR 0.80-1.01             | RR 0.83 (0.81-0.90) | Moderate<br><br>This outcome had one serious (-1) therefore <b>downgrade by 1 to moderate.</b> | If results of Ponce 2019 SR removed, the certainty in results would be higher.            |
| <b>All-Cause Mortality</b> | 8          | Not serious  | Not serious                                                                                                                                                                     | Not serious                                     | Not serious                                                       | Undetected       | 17,515-88,876           | RR 0.87-0.95             | RR 0.91 (0.87-0.93) | High<br><br>This outcome had no downgrades.                                                    | Although statistical significance varied (i.e. 4 out of 8 were statistically significant) |

| Outcome               | No. of SRs | Risk of Bias | Inconsistency                                                                                    | Indirectness | Imprecision                                                            | Publication Bias | No. of Patients (range) | Effect Estimate (range) | Median (IQR)        | Certainty | Other Comments                                                                 |
|-----------------------|------------|--------------|--------------------------------------------------------------------------------------------------|--------------|------------------------------------------------------------------------|------------------|-------------------------|-------------------------|---------------------|-----------|--------------------------------------------------------------------------------|
|                       |            |              |                                                                                                  |              |                                                                        |                  |                         |                         |                     |           | point estimates and CI all similar.                                            |
| <b>MI (All)</b>       | 4          | Not serious  | Not serious                                                                                      | Not serious  | Not serious                                                            | Undetected       | 8,240-95,148            | RR 0.45-0.73            | RR 0.59 (0.48-0.70) | High      | This outcome had no downgrades.                                                |
| <b>MI (Fatal)</b>     | 3          | Not serious  | Not serious                                                                                      | Not serious  | Serious<br>Wide CI (Li 2019: 0.24-0.98)                                | Undetected       | NR-10,975               | RR 0.49-0.72            | RR 0.61 (0.49-0.72) | Moderate  | This outcome had one serious (-1) therefore <b>downgrade by 1 to moderate.</b> |
| <b>MI (Non-fatal)</b> | 2          | Not serious  | Not serious                                                                                      | Not serious  | Not serious                                                            | Undetected       | NR-41,191               | RR 0.60-0.62            | RR 0.61             | High      | This outcome had no downgrades.                                                |
| <b>Stroke (All)</b>   | 5          | Not serious  | Not serious                                                                                      | Not serious  | Not serious                                                            | Undetected       | 18,515-78,473           | RR 0.76-0.80            | RR 0.78 (0.77-0.79) | High      | This outcome had no downgrades.                                                |
| <b>Stroke (Fatal)</b> | 3          | Not serious  | Serious<br>CIs are inconsistent and heterogeneity present (e.g., I <sup>2</sup> =0%, 68% or 77%) | Not serious  | Serious<br>Wide CIs (e.g. Kim 2020: 0.08-8.21; Taylor 2013: 0.18-2.23) | Undetected       | NR-27,238               | RR 0.63-0.81            | RR 0.79 (0.63-0.81) | Low       | This outcome had two serious (-2) therefore <b>downgrade by 2 to low.</b>      |

| Outcome                     | No. of SRs | Risk of Bias | Inconsistency                                                                                                                               | Indirectness                                                                                            | Imprecision                                                                                                                                                           | Publication Bias | No. of Patients (range) | Effect Estimate (range) | Median (IQR)        | Certainty | Other Comments                                                                   |
|-----------------------------|------------|--------------|---------------------------------------------------------------------------------------------------------------------------------------------|---------------------------------------------------------------------------------------------------------|-----------------------------------------------------------------------------------------------------------------------------------------------------------------------|------------------|-------------------------|-------------------------|---------------------|-----------|----------------------------------------------------------------------------------|
| <b>Stroke (Non-fatal)</b>   | 2          | Not serious  | Not serious                                                                                                                                 | Not serious                                                                                             | Not serious                                                                                                                                                           | Undetected       | NR-28,097               | RR 0.69-0.84            | RR 0.77             | High      | This outcome had no downgrades.                                                  |
| <b>Secondary Prevention</b> |            |              |                                                                                                                                             |                                                                                                         |                                                                                                                                                                       |                  |                         |                         |                     |           |                                                                                  |
| <b>MACE</b>                 | 5          | Not serious  | Not serious                                                                                                                                 | Not serious                                                                                             | Not serious                                                                                                                                                           | Undetected       | 2,080-52,874            | RR 0.68-0.81            | RR 0.80 (0.73-0.81) | High      |                                                                                  |
| <b>CV Mortality</b>         | 4          | Not serious  | Not serious                                                                                                                                 | Not serious                                                                                             | Serious<br><br>Wide CIs for 2 SRs:<br>Kim 2020: 0.20-1.45,<br>Vale 2014: 0.28-1.09                                                                                    | Undetected       | 1,954-47,115            | RR 0.55-0.78            | RR 0.62 (0.55-0.76) | Moderate  | This outcome had one serious (-1) therefore <b>downgrade by 1 to moderate.</b>   |
| <b>All-Cause Mortality</b>  | 10         | Not serious  | Serious<br><br>Wide variation in point estimates (0.68-1.47), CIs overlap but more variable; 3 out of 10 SRs are statistically significant. | Serious<br><br>Different populations studied in some SRs (e.g., post-stroke (5 SRs)) and ACS (one SR)). | Serious<br><br>Wide CIs indicating benefit and harm (eg. Fang 2017 0.60-2.35, Squizzato 2011 0.60-3.81, Vale 2014 0.39-1.20); 2 out of 10 SRs were under 500 patients | Undetected       | 239-57,354              | RR 0.68-1.47            | RR 0.92 (0.84-1.07) | Very low  | This outcome had three serious (-3) therefore <b>downgrade by 3 to very low.</b> |
| <b>All-Cause Mortality</b>  | 4          | Not serious  | Not serious                                                                                                                                 | Not serious                                                                                             | Not serious                                                                                                                                                           | Undetected       | 7,993-52,874            | RR 0.80-0.95            | RR 0.86             | High      | Post-hoc analysis;                                                               |

| Outcome             | No. of SRs | Risk of Bias | Inconsistency                                                            | Indirectness                                         | Imprecision                                               | Publication Bias | No. of Patients (range) | Effect Estimate (range)    | Median (IQR)        | Certainty                                                                                                                | Other Comments                    |
|---------------------|------------|--------------|--------------------------------------------------------------------------|------------------------------------------------------|-----------------------------------------------------------|------------------|-------------------------|----------------------------|---------------------|--------------------------------------------------------------------------------------------------------------------------|-----------------------------------|
|                     |            |              |                                                                          |                                                      |                                                           |                  |                         |                            | (0.81-0.93)         | This outcome had no downgrades.                                                                                          | Post-stroke and ACS SRs removed   |
| <b>MI (All)</b>     | 3          | Not serious  | Serious<br><br>Heterogeneity due to Vale (point estimate and CI and NSS) | Serious<br><br>Downgraded due to Vale (ACS patients) | Serious<br><br>Vale's CI was wide and included no benefit | Undetected       | 1,954-26,922            | RR 0.68-0.94               | RR 0.73 (0.68-0.94) | Very low<br><br>This outcome had three serious (-3) therefore <b>downgrade by 3 to very low.</b>                         |                                   |
| <b>MI (All)</b>     | 2          | Not serious  | Not serious                                                              | Not serious                                          | Not serious                                               | Undetected       | 7,051-26,922            | RR 0.68-0.73               | RR 0.71             | High<br><br>This outcome had no downgrades.                                                                              | Post-hoc analysis; ACS SR removed |
| <b>MI (Fatal)</b>   | 1          | Not serious  | Serious<br><br>High heterogeneity (I2=59% moderate-substantial)          | Not serious                                          | Very serious<br><br>Wide CI (0.08-7.18)                   | Undetected       | NR                      | RR 0.75 (95% CI 0.08-7.18) | N/A                 | Very low<br><br>This outcome had one serious (-1) and one very serious (-2) therefore <b>downgrade by 3 to very low.</b> |                                   |
| <b>Stroke (All)</b> | 7          | Not serious  | Serious<br><br>Variance in point estimate (e.g. 0.38-1.05); 1 out of 7   | Serious<br><br>4/7 are stroke population; 1/7 is ACS | Serious<br><br>Vale is outlier and wide CI                | Undetected       | 889-22,763              | RR 0.38-1.05               | RR 0.90 (0.88-0.93) | Very low<br><br>This outcome had three serious (-3) therefore <b>downgrade</b>                                           |                                   |

| Outcome                       | No. of SRs | Risk of Bias | Inconsistency              | Indirectness | Imprecision                                                                 | Publication Bias | No. of Patients (range) | Effect Estimate (range)    | Median (IQR) | Certainty                | Other Comments                                                                                                  |
|-------------------------------|------------|--------------|----------------------------|--------------|-----------------------------------------------------------------------------|------------------|-------------------------|----------------------------|--------------|--------------------------|-----------------------------------------------------------------------------------------------------------------|
|                               |            |              | statistically significance |              |                                                                             |                  |                         |                            |              | <b>by 3 to very low.</b> |                                                                                                                 |
| <b>Stroke (All)</b>           | 2          | Not serious  | Not serious                | Not serious  | Not serious                                                                 | Undetected       | 10,706-22,763           | RR 0.90-0.93               | RR 0.92      | High                     | Post-hoc analysis; Post-stroke, ACS SRs removed                                                                 |
| <b>Stroke (Fatal)</b>         | 1          | Not serious  | Not serious                | Not serious  | Serious<br>Wide CI (0.70-1.78)                                              | Undetected       | NR                      | RR 1.11 (95% CI 0.70-1.78) | N/A          | Moderate                 | This outcome had one serious (-1) therefore <b>downgrade by 1 to moderate.</b>                                  |
| <b>Patients with Diabetes</b> |            |              |                            |              |                                                                             |                  |                         |                            |              |                          |                                                                                                                 |
| <b>MACE</b>                   | 2          | Not serious  | Not serious                | Not serious  | Serious<br>CIs are wide (e.g. Singh 2020: 0.19-1.04; Ponce 2019: 0.42-1.06) | Undetected       | NR-1,129                | RR 0.45-0.67               | RR 0.56      | Moderate                 | Primary prevention population<br>This outcome had two serious (-1) therefore <b>downgrade by 1 to moderate.</b> |
| <b>CV Mortality</b>           | 2          | Not serious  | Not serious                | Not serious  | Serious<br>Wide CIs (Ponce 2019: 0.30-1.33; Singh 2020: 0.36-1.15)          | Undetected       | NR-1,129                | RR 0.63-0.65               | RR 0.64      | Moderate                 | Primary prevention population<br>This outcome had one serious (-1) therefore <b>downgrade by 1 to moderate.</b> |

| Outcome             | No. of SRs | Risk of Bias | Inconsistency | Indirectness | Imprecision                                                                                                                                                                             | Publication Bias | No. of Patients (range) | Effect Estimate (range) | Median (IQR) | Certainty                                                                                      | Other Comments                |
|---------------------|------------|--------------|---------------|--------------|-----------------------------------------------------------------------------------------------------------------------------------------------------------------------------------------|------------------|-------------------------|-------------------------|--------------|------------------------------------------------------------------------------------------------|-------------------------------|
| All-Cause Mortality | 2          | Not serious  | Not serious   | Not serious  | Serious<br><br>Wide CIs for Ponce 2019 (0.51-1.18)                                                                                                                                      | Undetected       | NR-1,129                | RR 0.70-0.78            | RR 0.74      | Moderate<br><br>This outcome had one serious (-1) therefore <b>downgrade by 1 to moderate</b>  | Primary prevention population |
| MI (All)            | 2          | Not serious  | Not serious   | Not serious  | Serious<br><br>CIs are wide (Ponce 2019: 0.22-0.77, Singh 2020: 0.35-0.81) – calculation for OIS was attempted but CARDS study did not report sample size needed for the outcome of MI. | Undetected       | NR-1,129                | RR 0.41-0.53            | RR 0.47      | Moderate<br><br>This outcome had one serious (-1) therefore <b>downgrade by 1 to moderate.</b> | Primary prevention population |
| Stroke (All)        | 2          | Not serious  | Not serious   | Not serious  | Serious<br><br>Wide CIs (Ponce 2019: 0.27-1.03, Singh 2020: 0.39-0.89)                                                                                                                  | Undetected       | NR-1,129                | RR 0.53-0.59            | RR 0.56      | Moderate<br><br>This outcome had one serious (-1) therefore <b>downgrade by 1 to moderate.</b> | Primary prevention population |

Patients with Chronic Kidney Disease



| Outcome                         | No. of SRs | Risk of Bias | Inconsistency                                                            | Indirectness | Imprecision                    | Publication Bias | No. of Patients (range) | Effect Estimate (range)    | Median (IQR) | Certainty | Other Comments                                                            |
|---------------------------------|------------|--------------|--------------------------------------------------------------------------|--------------|--------------------------------|------------------|-------------------------|----------------------------|--------------|-----------|---------------------------------------------------------------------------|
| <b>MACE</b>                     | 1          | Not serious  | Not serious                                                              | Not serious  | Not serious                    | Undetected       | 36,033                  | RR 0.72 (95% CI 0.67-0.79) | N/A          | High      | This outcome had no downgrades.                                           |
| <b>CV Mortality</b>             | 1          | Not serious  | Not serious                                                              | Not serious  | Not serious                    | Undetected       | 19,059                  | RR 0.77 (95% CI 0.69-0.87) | N/A          | High      | This outcome had no downgrades.                                           |
| <b>All-Cause Mortality</b>      | 1          | Not serious  | Not serious                                                              | Not serious  | Not serious                    | Undetected       | 28,276                  | RR 0.79 (95% CI 0.69-0.91) | N/A          | High      | This outcome had no downgrades.                                           |
| <b>MI (All)</b>                 | 1          | Not serious  | Not serious                                                              | Not serious  | Not serious                    | Undetected       | 9,018                   | RR 0.55 (95% CI 0.42-0.72) | N/A          | High      | This outcome had no downgrades.                                           |
| <b>Stroke (All)</b>             | 1          | Not serious  | Serious<br>High heterogeneity (I <sup>2</sup> =53% moderate-substantial) | Not serious  | Serious<br>Wide CI (0.35-1.12) | Undetected       | 8,658                   | RR 0.63 (95% CI 0.35-1.12) | N/A          | Low       | This outcome had two serious (-2) therefore <b>downgrade by 2 to low.</b> |
| <b>Adverse Events (Overall)</b> |            |              |                                                                          |              |                                |                  |                         |                            |              |           |                                                                           |
| <b>Overall AEs</b>              | 2          | Not serious  | Not serious                                                              | Not serious  | Not serious                    | Undetected       | 3,254-40,716            | RR 0.99-1.00               | RR 1.00      | High      | This outcome had no downgrades.                                           |
| <b>Serious AEs</b>              | 2          | Not serious  | Not serious                                                              | Not serious  | Not serious                    | Undetected       | 15,947-42,952           | RR 0.99-1.01               | RR 1.00      | High      | This outcome                                                              |

| Outcome                    | No. of SRs                 | Risk of Bias | Inconsistency                      | Indirectness | Imprecision                                                                                                        | Publication Bias | No. of Patients (range) | Effect Estimate (range) | Median (IQR)        | Certainty          | Other Comments                                                                                                                                                                                                                         |
|----------------------------|----------------------------|--------------|------------------------------------|--------------|--------------------------------------------------------------------------------------------------------------------|------------------|-------------------------|-------------------------|---------------------|--------------------|----------------------------------------------------------------------------------------------------------------------------------------------------------------------------------------------------------------------------------------|
|                            |                            |              |                                    |              |                                                                                                                    |                  |                         |                         |                     | had no downgrades. |                                                                                                                                                                                                                                        |
| <b>Withdrawals</b>         | 6                          | Not serious  | Not serious                        | Not serious  | Not serious                                                                                                        | Undetected       | 4,219-129,680           | RR 0.87-1.16            | RR 1.00 (0.90-1.08) | High               | This outcome had no downgrades.                                                                                                                                                                                                        |
| <b>Any muscle symptoms</b> | 5                          | Not serious  | Not serious                        | Not serious  | Not serious                                                                                                        | Undetected       | 16,633-94,635           | RR 1.01-1.05            | RR 1.03 (1.01-1.05) | High               | Wide spectrum of symptoms included in SR definitions: pain, weakness, cramps, tenderness, etc.                                                                                                                                         |
| <b>Myalgia</b>             | 5                          | Not serious  | Not serious                        | Not serious  | Not serious                                                                                                        | Undetected       | 22,533-62,214           | RR 1.02-1.13            | RR 1.03 (1.02-1.11) | High               | This outcome had no downgrades.                                                                                                                                                                                                        |
| <b>Myopathy</b>            | 7 (6 used in calculations) | Not serious  | Serious<br>Varying point estimates | Not Serious  | Serious<br>Wide CIs that include potential benefit to largely increased relative harm, Vale outlier (ACS patients) | Undetected       | 4,677-85,740            | RR 0.88-4.69            | RR 1.09 (1.02-2.16) | Low                | This outcome had two serious (-2) therefore <b>downgrade by 2 to low.</b><br>Two SRs defined as muscle symptoms with CK>10 times ULN (Singh 2020, Vale 2014), two used trial definitions (Yebyo 2019, Cai 2021); Cai may have included |

| Outcome                           | No. of SRs                 | Risk of Bias | Inconsistency                                                                            | Indirectness                                                        | Imprecision                                                                                | Publication Bias | No. of Patients (range) | Effect Estimate (range) | Median (IQR)        | Certainty                                                                                        | Other Comments                                                                                                                                      |
|-----------------------------------|----------------------------|--------------|------------------------------------------------------------------------------------------|---------------------------------------------------------------------|--------------------------------------------------------------------------------------------|------------------|-------------------------|-------------------------|---------------------|--------------------------------------------------------------------------------------------------|-----------------------------------------------------------------------------------------------------------------------------------------------------|
|                                   |                            |              |                                                                                          |                                                                     |                                                                                            |                  |                         |                         |                     |                                                                                                  | rhabdomyolysis cases); 3 SRs did not provide definition (Li 2019, Zhou 2020, Riaz 2017)                                                             |
| <b>Liver dysfunction</b>          | 4 (3 used in calculations) | Not serious  | Not serious                                                                              | Serious<br><br>Various definitions used in SRs                      | Not serious                                                                                | Undetected       | 18,071-74,078           | RR 1.15-1.33            | RR 1.17 (1.15-1.33) | Moderate<br><br>This outcome had one serious (-1) therefore <b>downgrade by 1 to moderate.</b>   | Varied definitions: liver enzyme changes & liver disorders (Cai 2021); original trial definitions (Yebyo 2019); no definition (Li 2019, Liang 2018) |
| <b>Elevated liver enzymes</b>     | 6                          | Not serious  | Serious<br><br>Varying point estimates, I2 is moderate-substantial for some SRs (0%-73%) | Serious<br><br>4 SRs did not define; 2 defined as AST/ALT >2-3x ULN | Serious<br><br>Wide CIs (Palmer 2014: 0.39-1.50; Li 2019: 1.00-5.60; Vale 2014: 1.16-5.32) | Undetected       | 7,991-123,051           | RR 0.76-2.49            | RR 1.32 (1.06-2.39) | Very low<br><br>This outcome had three serious (-3) therefore <b>downgrade by 3 to very low.</b> | Varied definitions: degree of elevation not defined (Li 2019, Palmer 2014, Taylor 2013, Villani 2019); >2-3X ULN (Singh 2020, Vale 2014)            |
| <b>Incident diabetes mellitus</b> | 9                          | Not serious  | Not serious                                                                              | Serious                                                             | Not serious                                                                                | Undetected       | 24,407-95,102           | RR 1.01-1.21            | RR 1.10 (1.07-1.14) | Moderate<br><br>This outcome had one                                                             | Varied definitions: One SR defined                                                                                                                  |

| Outcome | No. of SRs | Risk of Bias | Inconsistency | Indirectness                    | Imprecision | Publication Bias | No. of Patients (range) | Effect Estimates (range) | Median (IQR) | Certainty                                                 | Other Comments                                                                                                                                                                                                                                                                                                                                                                                                                       |
|---------|------------|--------------|---------------|---------------------------------|-------------|------------------|-------------------------|--------------------------|--------------|-----------------------------------------------------------|--------------------------------------------------------------------------------------------------------------------------------------------------------------------------------------------------------------------------------------------------------------------------------------------------------------------------------------------------------------------------------------------------------------------------------------|
|         |            |              |               | Various definitions used in SRs |             |                  |                         |                          |              | serious (-1) therefore <b>downgrade by 1 to moderate.</b> | inclusion as a clear report of newly diagnosed diabetes mellitus as adverse effect in RCT, or initiation of diabetic medications during trial, or two consecutive readings of fast blood glucose $\geq$ 7mmol/L during study (Khan 2019). The remaining SRs used trial definitions of diabetes (Cai 2021, Yebo 2019) or did not describe diagnostic criteria (Li 2019, Domecq 2019, Engeda 2019, Wang 2017, Singh 2020, Taylor 2013) |

| Outcome               | No. of SRs | Risk of Bias | Inconsistency                          | Indirectness                                                                                                                                        | Imprecision                                                            | Publication Bias | No. of Patients (range) | Effect Estimate (range) | Median (IQR)        | Certainty                                                                                                                | Other Comments                                                                                                                                               |
|-----------------------|------------|--------------|----------------------------------------|-----------------------------------------------------------------------------------------------------------------------------------------------------|------------------------------------------------------------------------|------------------|-------------------------|-------------------------|---------------------|--------------------------------------------------------------------------------------------------------------------------|--------------------------------------------------------------------------------------------------------------------------------------------------------------|
| <b>Renal disorder</b> | 4          | Not serious  | Not serious                            | Serious<br><br>3 SRs did not define renal disorders beyond “renal dysfunction/disorder”; one defined as proteinuria & non-specified renal disorders | Not serious                                                            | Undetected       | 27,804-32,001           | RR 1.11-1.13            | RR 1.12 (1.11-1.13) | Moderate<br><br>This outcome had one serious (-1) therefore <b>downgrade by 1 to moderate.</b>                           | Variably described: “renal dysfunction” (Yebo 2019, Taylor 2013), “renal disorder” (Li 2019), proteinuria & non-specified disorders (Cai 2021)               |
| <b>Rhabdomyolysis</b> | 8          | Not serious  | Serious<br><br>Varying point estimates | Not serious                                                                                                                                         | Very Serious<br><br>Wide CIs for all SRs (e.g. Vale 2014: 0.36-133.47) | Undetected       | 4,497-76,507            | RR 0.84-6.90            | RR 1.15 (0.95-2.58) | Very low<br><br>This outcome had one serious (-1) and one very serious (-2) therefore <b>downgrade by 3 to very low.</b> | Six SRs did not define rhabdomyolysis criteria (Li 2019, Singh 2020, Taylor 2013, Vale 2014, Zhou 2020, Palmer 2014) while Davis 2021 used trial definition. |
| <b>CK elevation</b>   | 4          | Not serious  | Serious<br><br>Varying point estimates | Not serious                                                                                                                                         | Very serious<br><br>Wide CIs for all SRs (e.g. Davis 2021: 0.25-30.11; | Undetected       | 5,000-61,396            | RR 0.88-2.73            | RR 1.24 (0.95-2.38) | Very low<br><br>This outcome had one serious (-1) and one very serious (-2)                                              | Defined in 2 SRs as CK >10XULN (Davis 2021, Singh 2020); one SR did not define beyond “CK                                                                    |

| Outcome | No. of SRs | Risk of Bias | Inconsistency | Indirectness | Imprecision             | Publication Bias | No. of Patients (range) | Effect Estimate (range) | Median (IQR) | Certainty                                    | Other Comments       |
|---------|------------|--------------|---------------|--------------|-------------------------|------------------|-------------------------|-------------------------|--------------|----------------------------------------------|----------------------|
|         |            |              |               |              | Li 2019:<br>0.14-12.22) |                  |                         |                         |              | therefore <b>downgrade by 3 to very low.</b> | elevation" (Li 2019) |

ACS= Acute Coronary Syndrome; CIs=Confidence Intervals; SR=Systematic Review; ULN= upper limit of normal; CK=creatinine kinase
