# Supplementary material
Source: PubMed Central journal article supplement (PMC10575662)
Supplement: Appendix_8_Table_In_Secondary_Prevention.pdf [file Appendix_8_Table_In_Secondary_Prevention.pdf]

Appendix 8. Efficacy of Lipid Lowering Treatments for Secondary Cardiovascular Disease Prevention

| Intervention                | MACE             | Cardiovascular mortality | All-cause mortality |
|-----------------------------|------------------|--------------------------|---------------------|
|                             | Median RR* (n/N) | Median RR* (n/N SR)      | Median RR* (n/N SR) |
| <b>BAS<sup>‡</sup></b>      | NR               | NR                       | NR                  |
| <b>Ezetimibe</b>            | 0.94 (1/1)       | NR                       | 0.98 (0/1)          |
| <b>Fibrates</b>             | 0.88 (1/1)       | 0.95 (0/1)               | 0.98 (0/1)          |
| <b>Niacin</b>               | NR               | NR                       | NR                  |
| <b>Omega-3s (EPA+DHA)</b>   | NR               | NR                       | NR                  |
| <b>EPA only<sup>‡</sup></b> | NR               | NR                       | NR                  |
| <b>PCSK9 Inhibitors</b>     | 0.84 (3/4)       | 0.95 (0/4)               | 0.94 (0/3)          |
| <b>Statins</b>              | 0.80 (4/5)       | 0.62 (2/4)               | 0.99 (3/10)         |

Green cells represent significant results (results from at least half of the SRs were statistically significant);

\*RR < 1.0 indicates that the outcome trended in favor of the intervention; mean RR used if 2 SRs;

<sup>‡</sup>Evidence comprised of randomized controlled trials;

n/N: number of statistically significant systematic reviews/total number of systematic reviews;

MACE: major adverse cardiovascular events; RR: risk ratio; BAS: bile acid sequestrants;; EPA: eicosapentaenoic acid; NR: not reported; PCSK9: proprotein convertase subtilisin/kexin type 9
