# Supplementary material
Source: PubMed Central journal article supplement (PMC10575662)
Supplement: Appendix_10_Evidence_Team_Table_COI.pdf [file Appendix_10_Evidence_Team_Table_COI.pdf]

Systematic Review Author COI

| Name                                  | Affiliation                                                                       | Direct financial relationships                                                                                                                                                                                                                                                            | Advisory board or speaker's bureau | Funded grants, research, or clinical trials    | Patents for a drug or device | Other investments or relationships | Written related articles                                                                                                                     | Presented on related topics                                               | Apps, software, tools, etc.        |
|---------------------------------------|-----------------------------------------------------------------------------------|-------------------------------------------------------------------------------------------------------------------------------------------------------------------------------------------------------------------------------------------------------------------------------------------|------------------------------------|------------------------------------------------|------------------------------|------------------------------------|----------------------------------------------------------------------------------------------------------------------------------------------|---------------------------------------------------------------------------|------------------------------------|
| <b>EVIDENCE TEAM</b>                  |                                                                                   |                                                                                                                                                                                                                                                                                           |                                    |                                                |                              |                                    |                                                                                                                                              |                                                                           |                                    |
| <b>G Michael Allen MD CCFP</b>        | Director of Programs and Practice Support, College of Family Physicians of Canada | Yes<br>Speaking (with travel and/or honorarium) for Diabetes Society Edmonton, ACFP family medicine summit and PEIP, SRPC, BS Medicine, NBCFP, OCFP, Peterborough Hosp Society, UBC CPD dept, Sharp HMO, WCB AB, worksafe BC, RxFiles, MEME conference, NLCFP. Nothing from drug industry | No                                 | Yes<br>BedMed (public funding: CIHR and PRIHS) | No                           | No                                 | Yes<br>Tools for Practice on CVD; hypertension systematic review; publications including risk assessment papers; simplified lipid guidelines | Yes<br>Multiple talks on CVD, multiple times per year for last 10+ years. | Yes<br>BS medicine risk calculator |
| <b>Émélie Braschi MD CCFP PhD</b>     | Lecturer, Department of Family Medicine, University of Ottawa                     | Yes<br>CFPC salary                                                                                                                                                                                                                                                                        | No                                 | No                                             | No                           | No                                 | No                                                                                                                                           | No                                                                        | Yes<br>CFPC Learn in the Clinic    |
| <b>Nicolas Dugré PharmD MSc BCACP</b> | Pharmacist, CIUSSS du Nord-de-l'Île-de-                                           | Yes<br>Honoraria for articles and presentations:                                                                                                                                                                                                                                          | No                                 | Yes<br>Research funded by non-industry         | No                           | No                                 | No                                                                                                                                           | Yes<br>Presentation on hypolipemiants                                     | No                                 |

| Name                                         | Affiliation                                                                                     | Direct financial relationships                                                                                                                                                                                                                                                                                    | Advisory board or speaker's bureau | Funded grants, research, or clinical trials                                                                              | Patents for a drug or device | Other investments or relationships | Written related articles | Presented on related topics                                                                                                           | Apps, software, tools, etc. |
|----------------------------------------------|-------------------------------------------------------------------------------------------------|-------------------------------------------------------------------------------------------------------------------------------------------------------------------------------------------------------------------------------------------------------------------------------------------------------------------|------------------------------------|--------------------------------------------------------------------------------------------------------------------------|------------------------------|------------------------------------|--------------------------|---------------------------------------------------------------------------------------------------------------------------------------|-----------------------------|
|                                              | Montréal; Associate Professor, Faculty of Pharmacy, Université de Montréal                      | Fédération des médecins omnipraticiens du Québec, Ordre des pharmaciens du Québec, Uniprix, Familiprix, Jean-Coutu, College of Family Physicians of Canada, Association des pharmaciens du Saguenay-Lac-St-Jean, Société québécoise de la douleur, Fédération des pharmaciens du Québec, Pharmascope, EnsembleIQ. |                                    | related grants (Réseau-1 Québec and Fondation du Cercle du Doyen de la faculté de pharmacie de l'Université de Montréal) |                              |                                    |                          | for the Federation des médecins omnipraticiens du Québec                                                                              |                             |
| <b>Jamie Falk<br/>BSc (Pharm)<br/>PharmD</b> | Associate Professor, College of Pharmacy/ Department of Family Medicine, University of Manitoba | Yes<br>Board member, conference organizer, speaker for Health Education Collaboration                                                                                                                                                                                                                             | No                                 | Yes<br>Ongoing grant to track and document opioid use and misuse in Manitoba, College of Pharmacists of Manitoba         | No                           | No                                 | No                       | Yes<br>All of these are topics I am asked to speak on at conferences for pharmacists, physicians, and other health care professionals | No                          |

| Name                                    | Affiliation                                                               | Direct financial relationships                                                     | Advisory board or speaker's bureau | Funded grants, research, or clinical trials                                                                                                     | Patents for a drug or device | Other investments or relationships                                    | Written related articles                                            | Presented on related topics                                                                                                                       | Apps, software, tools, etc. |
|-----------------------------------------|---------------------------------------------------------------------------|------------------------------------------------------------------------------------|------------------------------------|-------------------------------------------------------------------------------------------------------------------------------------------------|------------------------------|-----------------------------------------------------------------------|---------------------------------------------------------------------|---------------------------------------------------------------------------------------------------------------------------------------------------|-----------------------------|
| <b>Liesbeth S Froentjes MSc</b>         | Research Assistant, Department of Family Medicine, University of Alberta  | Yes<br><br>Independent contractor for CFPC                                         | No                                 | No                                                                                                                                              | No                           | No                                                                    | No                                                                  | No                                                                                                                                                | No                          |
| <b>Scott Garrison MD CCFP PhD</b>       | Professor, Dept of Family Medicine, University of Alberta                 | No                                                                                 | No                                 | Yes<br>CIHR, Alberta Innovates; principal investigator for the publicly funded BedMed trial. I receive no funding from these grants personally. | No                           | No                                                                    | Yes<br>Evidence reviewer for the first Simplified Lipid Guideline   | Yes<br>CV risk reduction is often part of any talk on EBM or prevention, which I give periodically to learners or family physicians at CME events | No                          |
| <b>Jessica EM Kirkwood MD CCFP (AM)</b> | Assistant Professor, Department of Family Medicine, University of Alberta | Yes<br><br>Speaker's honoraria from CFPC, ACFP and CPSS                            | No                                 | No                                                                                                                                              | No                           | No                                                                    | No                                                                  | No                                                                                                                                                | No                          |
| <b>Michael R Kolber MD CCFP MSc</b>     | Professor, Department of Family Medicine, University of Alberta           | Yes<br>Expense reimbursement and honoraria from not for profits for presentations: | No                                 | Yes<br><br>CIHR, PRUIS (collaborator), participant in publicly funded trials                                                                    | No                           | Yes<br>Founder of EMPRSS (University of Alberta spin off company that | Yes<br>2015 PEER lipid guideline author, various Tools for Practice | Yes<br>Presented on CVD for primary care                                                                                                          | No                          |

| Name                                       | Affiliation                                                                                                                                          | Direct financial relationships                                                                                                                                                                    | Advisory board or speaker's bureau | Funded grants, research, or clinical trials         | Patents for a drug or device | Other investments or relationships              | Written related articles                                                                                                                        | Presented on related topics                                     | Apps, software, tools, etc. |
|--------------------------------------------|------------------------------------------------------------------------------------------------------------------------------------------------------|---------------------------------------------------------------------------------------------------------------------------------------------------------------------------------------------------|------------------------------------|-----------------------------------------------------|------------------------------|-------------------------------------------------|-------------------------------------------------------------------------------------------------------------------------------------------------|-----------------------------------------------------------------|-----------------------------|
|                                            |                                                                                                                                                      | CFPC, ACFP, SRPC, MEME<br>Peterborough Health                                                                                                                                                     |                                    | under Pragmatic Trials Collaboration (BedMed Trial) |                              | evaluates the quality of endoscopies performed) |                                                                                                                                                 |                                                                 |                             |
| <b>Christina Korownyk MD CCFP</b>          | Professor, Department of Family Medicine, University of Alberta                                                                                      | Yes<br><br>Speaker at various conferences:                                                                                                                                                        | No                                 | Yes<br><br>BedMed Trial funded by CIHR, PRIHS       | No                           | No                                              | Yes<br><br>Author on related Tools for Practice and Clinical practice guidelines have big problems: The fix is simple.                          | Yes<br><br>Presented on primary and secondary prevention of CVD | No                          |
| <b>Adrienne J Lindblad BSP ACPR PharmD</b> | Clinical Evidence Expert Lead, College of Family Physicians of Canada; Associate Clinical Professor, Dept. of Family Medicine, University of Alberta | Yes<br><br>CFPC; ACFP; SCFP; PEER; MEME; Alberta Pharmacists Association (RxA); North of 44 Primary Care Symposium; Paid employee (CFPC 2020-present, ACFP 2013-2020); Speaker's honoraria (ACFP, | No                                 | No                                                  | No                           | No                                              | Yes<br><br>Author of PEER's 2015 Simplified Lipid Guideline; Various Tools for Practice articles. Author: Clinical practice guidelines have big | Yes<br><br>Various talks related to the 2015 lipid guideline    | No                          |

| Name                                        | Affiliation                                                                   | Direct financial relationships                                                                  | Advisory board or speaker's bureau | Funded grants, research, or clinical trials | Patents for a drug or device | Other investments or relationships                                                                                       | Written related articles                                                                 | Presented on related topics                                                                                                               | Apps, software, tools, etc. |
|---------------------------------------------|-------------------------------------------------------------------------------|-------------------------------------------------------------------------------------------------|------------------------------------|---------------------------------------------|------------------------------|--------------------------------------------------------------------------------------------------------------------------|------------------------------------------------------------------------------------------|-------------------------------------------------------------------------------------------------------------------------------------------|-----------------------------|
|                                             |                                                                               | SCFP, PEER, MEME, RxA, North of 44)                                                             |                                    |                                             |                              |                                                                                                                          | problems:<br>The fix is simple.                                                          |                                                                                                                                           |                             |
| <b>James P McCormack BSc (Pharm) PharmD</b> | Professor, Faculty of Pharmaceutical Sciences, University of British Columbia | Yes<br><br>Speaker at various conferences, BS Medicine Podcast, book: The Nutrition Proposition | No                                 | No                                          | No                           | No                                                                                                                       | Yes<br><br>Author: Clinical practice guidelines have big problems:<br>The fix is simple. | Yes<br><br>I have given a number of talks on guidelines and lipids specifically over the last 2-3 years, all for non-profit organizations | No                          |
| <b>Samantha S Moe PharmD ACPR</b>           | Clinical Evidence Expert, College of Family Physicians of Canada              | Yes<br>ACFP, PEIP conference                                                                    | No                                 | No                                          | No                           | No                                                                                                                       | No                                                                                       | Yes<br>General CV topics that come up in New True Poo, Jeopardy, etc.                                                                     | No                          |
| <b>Allison Paige MD CCFP</b>                | Assistant Professor, Department of Family Medicine, University of Manitoba    | Yes<br>ACFP, speaker at the Family Medicine Summit 2022 - received an honorarium;               | No                                 | No                                          | No                           | Yes<br>Employee at the University of Manitoba Department of Family Medicine; Independent contractor at Winnipeg Regional | Yes                                                                                      | No                                                                                                                                        | No                          |

| Name                            | Affiliation                                                                                                       | Direct financial relationships                                                                                                                                          | Advisory board or speaker's bureau | Funded grants, research, or clinical trials | Patents for a drug or device | Other investments or relationships | Written related articles | Presented on related topics                                                                                                                   | Apps, software, tools, etc. |
|---------------------------------|-------------------------------------------------------------------------------------------------------------------|-------------------------------------------------------------------------------------------------------------------------------------------------------------------------|------------------------------------|---------------------------------------------|------------------------------|------------------------------------|--------------------------|-----------------------------------------------------------------------------------------------------------------------------------------------|-----------------------------|
|                                 |                                                                                                                   |                                                                                                                                                                         |                                    |                                             |                              | Health Authority                   |                          |                                                                                                                                               |                             |
| <b>Danielle Perry RN MSc</b>    | Clinical Evidence Expert, College of Family Physicians of Canada                                                  | Yes<br>CFPC (employee), Correctional Services of Canada (employee), ACFP, PEER (PEIP + PEER North), Dalhousie CPD, Centre for Effective Practice (receipt of honoraria) | No                                 | No                                          | No                           | No                                 | No                       | No                                                                                                                                            | No                          |
| <b>Jen Potter MD CCFP</b>       | Assistant Professor, Department of Family Medicine, University of Manitoba                                        | Yes                                                                                                                                                                     | No                                 | No                                          | No                           | No                                 | No                       | Yes<br>Academic half-day sessions to family medicine residents                                                                                | No                          |
| <b>Betsy S Thomas BSc Pharm</b> | Clinical Evidence Expert for the CFPC and Assistant Adjunct Professor in the Department of Family Medicine at the | Yes<br>Honoraria received for talk at Family Medicine Summit, ACFP                                                                                                      | No                                 | No                                          | No                           | No                                 | Yes                      | Yes<br>I have presented on various CV studies to family physicians and/or primary care providers as part of the Best Practice Support Program | No                          |

| Name                               | Affiliation                                                                                       | Direct financial relationships                                   | Advisory board or speaker's bureau | Funded grants, research, or clinical trials | Patents for a drug or device | Other investments or relationships | Written related articles                                            | Presented on related topics                                                                              | Apps, software, tools, etc. |
|------------------------------------|---------------------------------------------------------------------------------------------------|------------------------------------------------------------------|------------------------------------|---------------------------------------------|------------------------------|------------------------------------|---------------------------------------------------------------------|----------------------------------------------------------------------------------------------------------|-----------------------------|
|                                    | University of Alberta                                                                             |                                                                  |                                    |                                             |                              |                                    |                                                                     |                                                                                                          |                             |
| <b>Joey Ton PharmD</b>             | Program Manager, Programs and Practice Support Department, College of Family Physicians of Canada | No                                                               | No                                 | No                                          | No                           | No                                 | Yes<br><br>I have written "Tools for Practice" on PCSK-9 inhibitors | Yes<br>I have presented on the evidence written about PCSK-9 inhibitors                                  | No                          |
| <b>Justin Weresch MD CCFP</b>      | Assistant Professor, Department of Family Medicine, McMaster University                           | No                                                               | No                                 | No                                          | No                           | No                                 | No                                                                  | No                                                                                                       | No                          |
| <b>Jennifer Young MD CCFP (EM)</b> | Associate Clinical Professor, Department of Family Medicine, McMaster University                  | Yes<br>Speaker for OCFP; working for PEER team on pain guideline | No                                 | No                                          | No                           | No                                 | No                                                                  | Yes<br>I have presented the Risk Calculator in a course "Practicing Wisely" and in a case of CFPC Clinic | No                          |
